# Supplementary material for: CeCILE - An Artificial Intelligence Based Cell-Detection for the Evaluation of Radiation Effects in Eucaryotic Cells
Source: Front Oncol. 2021 Jun 30;11:688333. doi: 10.3389/fonc.2021.688333 (PMC8278143; doi:10.3389/fonc.2021.688333)
Supplement: Supplementary file 2 [file Table_5.xlsx]

## Sheet: l
FrameID	Start X	Start Y	End X	End Y	Classlabel	Confidence
0	450	250	542	336	liv	1.0
0	366	941	457	995	liv	1.0
0	492	563	550	631	liv	1.0
0	378	890	462	954	liv	1.0
0	394	233	452	283	liv	1.0
0	484	896	534	974	liv	1.0
0	430	500	484	573	liv	1.0
0	569	499	618	550	liv	0.9999999
0	455	175	511	249	liv	0.9999999
0	390	691	454	758	liv	0.9999999
0	408	599	448	698	liv	0.9999999
0	563	311	617	369	liv	0.99999964
0	496	191	547	266	liv	0.9999995
0	330	910	384	985	liv	0.9999995
0	1277	669	1319	707	round	0.9999995
0	174	561	208	594	round	0.99999905
0	1323	277	1377	372	liv	0.9999987
0	518	528	568	581	liv	0.99999833
0	905	49	958	94	liv	0.999998
0	304	98	361	141	liv	0.99999726
0	509	999	546	1032	round	0.99999714
0	996	319	1042	378	liv	0.99999654
0	418	202	474	253	liv	0.9999964
0	856	204	897	246	round	0.9999807
0	966	261	1035	298	liv	0.99997675
0	374	249	417	299	liv	0.9999715
0	366	302	413	349	liv	0.99995697
0	418	56	466	115	liv	0.99994326
0	529	862	567	901	round	0.9999336
0	481	500	523	546	liv	0.99976116
0	1300	290	1340	356	liv	0.99967706
0	1338	548	1388	592	liv	0.9995189
0	794	500	851	546	liv	0.99910337
0	803	541	851	577	liv	0.9990256
0	650	0	678	19	round	0.99892837
0	539	307	587	361	liv	0.99884856
0	438	987	470	1031	liv	0.9985411
0	530	460	580	497	round	0.9961253
0	1317	687	1361	726	round	0.99363834
0	458	967	501	996	round	0.9810523
0	608	0	639	11	liv	0.9238142
0	605	0	634	17	liv	0.8096472
0	372	992	454	1035	liv	0.7823792
0	1304	284	1343	361	liv	0.6812316
0	1364	715	1388	758	liv	0.5712198
1	374	890	467	955	liv	1.0
1	372	939	452	997	liv	1.0
1	400	692	458	753	liv	1.0
1	482	895	533	978	liv	1.0
1	498	561	551	634	liv	0.9999999
1	447	270	532	337	liv	0.9999999
1	410	601	449	697	liv	0.9999999
1	396	233	452	286	liv	0.9999999
1	563	310	621	370	liv	0.99999976
1	536	305	593	356	liv	0.99999976
1	435	514	485	571	liv	0.99999964
1	536	459	577	493	round	0.9999995
1	493	185	553	262	liv	0.9999994
1	1324	280	1376	375	liv	0.9999993
1	518	527	571	583	liv	0.9999993
1	1277	670	1317	711	round	0.9999993
1	372	992	460	1037	liv	0.99999917
1	1299	294	1341	356	liv	0.99999905
1	329	917	386	975	liv	0.9999988
1	795	499	854	545	liv	0.9999982
1	458	178	509	246	liv	0.9999982
1	965	260	1033	303	liv	0.999998
1	175	559	206	591	round	0.99999666
1	425	202	476	251	liv	0.9999963
1	508	1000	548	1032	round	0.9999927
1	1002	321	1040	367	round	0.9999926
1	568	499	621	546	liv	0.9999871
1	376	251	418	302	liv	0.9999827
1	418	51	469	120	liv	0.99997973
1	1321	684	1361	725	round	0.99997485
1	1346	553	1386	589	round	0.99997246
1	648	0	677	23	round	0.9999323
1	365	303	406	351	liv	0.99992657
1	479	502	523	545	liv	0.9998117
1	603	0	631	18	round	0.99958163
1	802	541	851	578	liv	0.999549
1	854	202	902	250	round	0.9992797
1	444	998	476	1032	liv	0.9963128
1	442	997	480	1031	liv	0.98978126
1	305	99	357	142	liv	0.9712304
1	460	965	506	998	round	0.8507815
1	458	961	507	998	liv	0.8257991
1	444	991	478	1030	liv	0.78667164
1	911	55	956	94	round	0.76366013
1	531	858	571	905	round	0.60946405
2	374	892	462	954	liv	1.0
2	399	691	454	754	liv	1.0
2	410	604	451	696	liv	0.9999999
2	382	943	448	986	liv	0.9999999
2	797	538	861	579	liv	0.99999976
2	901	48	958	97	liv	0.99999976
2	516	526	569	584	liv	0.99999964
2	394	230	451	277	liv	0.99999964
2	558	310	619	370	liv	0.9999994
2	371	992	464	1037	liv	0.9999994
2	473	499	525	550	liv	0.9999993
2	448	275	534	341	liv	0.9999993
2	1278	670	1318	711	round	0.9999993
2	1325	280	1376	376	liv	0.99999917
2	494	185	552	261	liv	0.99999917
2	437	506	483	582	liv	0.9999988
2	962	262	1031	302	liv	0.9999988
2	474	893	538	968	liv	0.99999857
2	539	458	578	494	round	0.99999845
2	459	179	509	247	liv	0.99999833
2	510	1000	547	1031	round	0.9999976
2	175	564	207	594	round	0.9999975
2	372	254	422	306	liv	0.9999957
2	499	566	551	628	liv	0.999995
2	1348	553	1387	589	round	0.99999344
2	306	99	361	141	liv	0.99999213
2	419	48	466	119	liv	0.99999094
2	797	499	854	542	liv	0.99998915
2	569	500	616	541	liv	0.9999862
2	854	203	898	246	round	0.99997294
2	448	998	480	1035	liv	0.99996245
2	531	858	571	904	round	0.99994504
2	367	307	405	344	round	0.99993134
2	648	0	677	21	round	0.99945253
2	1001	320	1040	372	round	0.99901295
2	455	964	506	993	liv	0.99853694
2	1297	294	1338	340	liv	0.99805117
2	453	961	504	996	liv	0.9975624
2	603	0	632	18	round	0.993725
2	428	204	469	249	round	0.9928901
2	539	308	591	363	liv	0.9876203
2	1364	739	1388	785	round	0.9106253
2	339	920	381	964	round	0.8056417
2	1319	687	1362	727	round	0.8051028
3	371	890	462	958	liv	1.0
3	486	905	534	984	liv	1.0
3	398	691	456	758	liv	1.0
3	897	45	958	96	liv	1.0
3	411	605	451	692	liv	0.9999999
3	449	274	532	340	liv	0.9999999
3	397	232	451	285	liv	0.9999999
3	998	315	1046	383	liv	0.9999999
3	371	990	453	1039	liv	0.99999976
3	516	523	572	582	liv	0.99999964
3	434	501	485	582	liv	0.9999995
3	458	176	508	245	liv	0.9999995
3	562	312	622	368	liv	0.9999994
3	494	185	553	261	liv	0.9999993
3	799	534	859	577	liv	0.9999989
3	1326	273	1379	376	liv	0.9999989
3	795	497	857	542	liv	0.99999857
3	176	558	206	591	round	0.99999857
3	1276	667	1320	713	round	0.99999845
3	373	941	449	984	liv	0.9999982
3	475	498	524	547	liv	0.999998
3	538	308	592	357	liv	0.9999976
3	498	568	553	632	liv	0.9999975
3	1350	550	1386	586	round	0.99999726
3	542	456	580	493	round	0.99999
3	527	857	571	903	round	0.9999889
3	507	998	549	1031	round	0.999985
3	366	301	404	343	round	0.99997985
3	854	204	898	246	round	0.99997866
3	454	993	481	1032	round	0.99996936
3	420	54	467	114	liv	0.9999654
3	375	252	418	301	liv	0.9999584
3	428	205	467	248	round	0.99995446
3	1320	683	1362	724	round	0.9999473
3	602	0	632	18	round	0.9999082
3	571	497	619	543	liv	0.9998994
3	338	919	379	961	round	0.999884
3	1296	292	1341	336	liv	0.99976844
3	969	264	1027	299	liv	0.9992118
3	303	97	363	136	liv	0.99918336
3	648	0	677	20	round	0.9988796
3	1361	734	1388	788	liv	0.99381506
3	463	967	502	998	liv	0.79734445
4	454	269	535	337	liv	1.0
4	482	899	532	977	liv	1.0
4	896	47	956	100	liv	1.0
4	367	892	466	961	liv	1.0
4	395	231	452	284	liv	1.0
4	564	314	618	366	liv	0.9999999
4	401	692	457	752	liv	0.9999999
4	412	606	452	690	liv	0.99999964
4	1325	278	1377	367	liv	0.9999995
4	367	989	462	1036	liv	0.9999994
4	439	507	483	579	liv	0.9999993
4	174	554	208	590	round	0.9999993
4	456	180	510	244	liv	0.99999917
4	517	527	570	581	liv	0.99999905
4	497	186	548	262	liv	0.9999988
4	569	497	618	547	liv	0.9999987
4	535	306	592	353	liv	0.99999845
4	473	496	524	548	liv	0.9999982
4	367	942	449	980	liv	0.99999726
4	537	454	579	488	round	0.9999968
4	1352	551	1386	586	round	0.99999654
4	799	535	857	576	liv	0.9999945
4	368	301	404	341	round	0.9999924
4	855	201	898	246	round	0.99998724
4	962	263	1029	298	liv	0.9999789
4	419	52	469	112	liv	0.9999752
4	501	571	556	629	liv	0.9999752
4	377	253	417	301	liv	0.99996865
4	529	857	571	902	round	0.9999492
4	426	206	467	249	round	0.999941
4	797	497	860	543	liv	0.9999261
4	304	96	365	133	liv	0.99991965
4	993	319	1042	377	liv	0.9997602
4	603	0	633	18	round	0.9996674
4	1363	731	1388	791	liv	0.99916506
4	461	961	506	997	liv	0.9990013
4	647	0	674	18	round	0.99822
4	454	991	493	1030	liv	0.9964186
4	458	991	492	1033	liv	0.9949728
4	1282	666	1320	709	round	0.9942814
4	330	915	378	959	round	0.9874418
4	1301	295	1337	331	round	0.95867956
4	1320	685	1362	725	round	0.95573115
4	511	997	549	1031	round	0.9370006
4	1366	710	1388	756	liv	0.7780558
4	456	987	496	1029	liv	0.5409446
5	367	893	464	961	liv	1.0
5	485	894	533	984	liv	1.0
5	450	265	535	339	liv	1.0
5	896	47	954	99	liv	1.0
5	514	522	569	584	liv	1.0
5	406	593	454	686	liv	1.0
5	367	938	450	982	liv	0.9999999
5	567	501	613	546	liv	0.9999999
5	563	311	618	368	liv	0.9999999
5	399	691	456	754	liv	0.99999976
5	397	231	450	288	liv	0.99999976
5	496	568	555	634	liv	0.99999976
5	796	497	859	546	liv	0.99999964
5	537	307	592	353	liv	0.9999995
5	995	321	1050	377	liv	0.9999994
5	173	554	207	589	round	0.99999905
5	1324	278	1377	369	liv	0.9999989
5	459	177	505	243	liv	0.9999988
5	498	186	549	264	liv	0.99999845
5	474	497	524	549	liv	0.99999833
5	365	985	465	1035	liv	0.9999982
5	797	536	861	576	liv	0.9999982
5	964	264	1034	299	liv	0.9999981
5	1285	666	1322	705	round	0.99999774
5	299	97	366	134	liv	0.9999949
5	1347	552	1386	588	round	0.99999475
5	531	452	577	489	round	0.9999933
5	367	300	403	340	round	0.9999926
5	375	252	419	301	liv	0.999992
5	510	998	550	1032	round	0.99998593
5	855	202	899	246	round	0.99998236
5	427	209	467	250	round	0.99995255
5	1299	295	1335	332	round	0.99974984
5	419	51	465	110	liv	0.9997147
5	528	858	572	902	round	0.9994741
5	332	918	379	956	round	0.9994597
5	461	964	502	993	round	0.9992392
5	438	494	485	581	liv	0.9988324
5	647	0	676	19	round	0.99798656
5	452	989	493	1032	liv	0.9975937
5	1367	707	1388	755	liv	0.9966808
5	450	991	489	1030	liv	0.9861709
5	1364	738	1388	791	liv	0.980839
5	1319	684	1367	724	liv	0.9772348
5	603	0	633	17	liv	0.9621511
5	604	0	634	13	liv	0.81437004
6	368	891	465	955	liv	1.0
6	367	936	453	981	liv	1.0
6	996	318	1043	380	liv	1.0
6	478	893	533	990	liv	1.0
6	892	49	955	98	liv	0.9999999
6	401	691	456	755	liv	0.9999999
6	563	311	619	367	liv	0.9999999
6	398	229	453	290	liv	0.9999999
6	453	269	537	337	liv	0.9999999
6	405	598	451	685	liv	0.9999999
6	514	522	577	585	liv	0.99999976
6	535	307	594	353	liv	0.99999976
6	494	191	545	260	liv	0.99999964
6	468	182	512	235	liv	0.9999995
6	964	265	1033	299	liv	0.9999995
6	176	557	208	591	round	0.9999994
6	1324	279	1379	369	liv	0.9999989
6	474	497	524	555	liv	0.9999982
6	304	95	365	134	liv	0.9999981
6	798	533	860	577	liv	0.99999774
6	799	496	856	542	liv	0.999997
6	374	252	419	302	liv	0.9999943
6	367	985	476	1035	liv	0.99999356
6	531	855	567	900	round	0.99999213
6	1347	554	1386	589	round	0.99999166
6	326	909	374	958	liv	0.9999914
6	1286	664	1323	706	round	0.9999906
6	418	50	463	110	liv	0.99998987
6	856	205	899	246	round	0.9999887
6	425	207	469	251	round	0.9999808
6	501	570	554	630	liv	0.9999608
6	1300	296	1334	332	round	0.9999312
6	564	501	613	543	liv	0.99990284
6	433	478	484	581	liv	0.9998822
6	529	449	573	490	round	0.9997496
6	649	0	676	18	round	0.99949646
6	368	302	401	341	round	0.99881077
6	1366	708	1387	751	liv	0.9987379
6	510	998	548	1031	round	0.99845743
6	1363	740	1387	789	liv	0.9959009
6	456	992	492	1035	liv	0.98679113
6	451	990	489	1036	liv	0.98125
6	462	965	501	997	round	0.9708791
6	1323	682	1365	725	liv	0.73320794
6	603	0	629	15	round	0.67747307
7	450	265	539	339	liv	1.0
7	893	50	952	101	liv	1.0
7	370	894	468	958	liv	1.0
7	559	312	619	366	liv	1.0
7	997	320	1048	380	liv	1.0
7	395	694	454	755	liv	1.0
7	532	310	595	354	liv	0.9999999
7	397	234	450	291	liv	0.9999999
7	486	900	533	982	liv	0.9999999
7	492	188	543	263	liv	0.99999976
7	406	595	456	681	liv	0.99999976
7	369	940	451	982	liv	0.9999995
7	515	526	576	587	liv	0.9999995
7	467	177	512	232	liv	0.9999993
7	965	264	1030	300	liv	0.9999993
7	1324	278	1378	368	liv	0.9999982
7	173	558	203	588	round	0.99999785
7	302	95	365	132	liv	0.99999774
7	527	856	569	901	round	0.9999962
7	855	205	897	245	round	0.9999962
7	1346	554	1387	590	round	0.9999937
7	418	45	461	112	liv	0.9999895
7	368	983	457	1036	liv	0.99998844
7	426	206	467	251	round	0.99998844
7	368	301	402	339	round	0.99998736
7	511	999	550	1032	round	0.99998677
7	472	497	522	554	liv	0.99998593
7	376	252	421	301	liv	0.9999858
7	454	986	487	1036	liv	0.9999677
7	504	571	556	628	liv	0.99996734
7	801	535	857	576	liv	0.9999602
7	799	499	857	542	liv	0.99994016
7	1289	663	1325	710	round	0.99986434
7	1366	713	1388	760	liv	0.9998312
7	1299	296	1333	333	round	0.9997675
7	529	455	576	490	round	0.9996904
7	452	991	491	1034	liv	0.9994242
7	439	478	482	583	liv	0.9976337
7	326	911	375	956	liv	0.9939294
7	650	0	678	17	round	0.9924508
7	1366	756	1388	792	liv	0.98813385
7	464	963	503	996	round	0.9873826
7	1366	751	1388	790	liv	0.98300284
7	1319	686	1368	724	round	0.9474448
7	603	0	633	15	liv	0.84218776
7	567	504	613	543	liv	0.7520646
7	604	0	637	11	liv	0.6104871
7	570	505	612	543	round	0.50624007
8	368	892	464	958	liv	1.0
8	362	943	462	980	liv	1.0
8	534	309	592	353	liv	1.0
8	557	312	618	365	liv	1.0
8	893	48	955	110	liv	1.0
8	493	187	545	263	liv	0.9999999
8	396	232	451	292	liv	0.9999999
8	995	315	1042	381	liv	0.9999999
8	401	694	455	755	liv	0.9999999
8	485	895	537	991	liv	0.9999999
8	452	261	538	339	liv	0.9999999
8	513	523	574	584	liv	0.99999976
8	420	37	461	109	liv	0.99999976
8	406	594	453	679	liv	0.99999964
8	467	182	514	232	liv	0.9999989
8	570	501	618	542	liv	0.9999989
8	364	985	462	1037	liv	0.9999989
8	169	557	204	588	round	0.9999989
8	1325	280	1377	364	liv	0.9999987
8	529	856	568	898	round	0.9999982
8	962	263	1032	298	liv	0.99999774
8	474	496	525	562	liv	0.9999976
8	800	533	858	576	liv	0.9999938
8	454	981	492	1039	liv	0.9999933
8	1287	666	1323	707	round	0.99999213
8	799	499	855	541	liv	0.9999918
8	426	206	468	251	round	0.9999908
8	856	205	898	246	round	0.99999034
8	1345	554	1386	591	round	0.9999894
8	375	254	422	301	liv	0.9999893
8	502	573	555	629	liv	0.99998224
8	369	301	402	341	round	0.99995875
8	1298	297	1330	334	round	0.99981433
8	1365	743	1387	795	liv	0.9997352
8	1367	712	1388	757	liv	0.99960035
8	511	1000	548	1033	round	0.99924755
8	1318	682	1369	724	liv	0.99669576
8	435	478	480	580	liv	0.99647254
8	303	93	365	130	liv	0.9934556
8	606	0	637	14	round	0.9898949
8	329	915	373	955	round	0.90640396
8	604	0	635	17	round	0.89154553
8	648	0	676	16	round	0.8681179
8	529	450	572	489	round	0.8180616
8	460	963	501	995	round	0.71524763
9	369	890	464	954	liv	1.0
9	453	263	538	337	liv	1.0
9	994	317	1050	382	liv	1.0
9	892	49	955	113	liv	1.0
9	476	894	531	985	liv	1.0
9	421	34	461	109	liv	0.9999999
9	493	185	545	270	liv	0.9999999
9	363	940	457	979	liv	0.9999999
9	558	314	622	366	liv	0.9999999
9	513	517	576	586	liv	0.99999964
9	396	236	453	294	liv	0.99999964
9	499	568	553	632	liv	0.9999995
9	464	176	513	234	liv	0.9999994
9	963	266	1026	301	liv	0.9999994
9	799	536	859	577	liv	0.9999993
9	171	554	205	587	round	0.9999988
9	535	311	592	355	liv	0.99999857
9	1324	281	1377	365	liv	0.99999857
9	453	983	490	1033	liv	0.9999982
9	407	598	452	676	liv	0.99999785
9	798	501	855	542	liv	0.99999726
9	569	501	616	543	liv	0.9999964
9	512	999	550	1033	round	0.99999595
9	1343	552	1387	588	round	0.99999475
9	367	984	458	1035	liv	0.9999927
9	529	852	568	902	round	0.999992
9	856	205	899	246	round	0.999987
9	375	254	423	300	liv	0.9999778
9	368	302	402	339	round	0.9999701
9	473	495	521	555	liv	0.99996173
9	1365	709	1387	752	liv	0.9999517
9	1287	656	1326	712	liv	0.99992716
9	532	453	572	488	round	0.9999242
9	401	693	457	753	liv	0.99992335
9	427	207	467	250	round	0.9999229
9	1298	298	1331	335	round	0.9999162
9	436	476	480	580	liv	0.9998196
9	605	0	630	17	round	0.99949014
9	649	0	677	19	round	0.99881494
9	462	963	504	995	round	0.9953602
9	305	94	364	132	liv	0.994232
9	646	0	681	20	round	0.9878163
9	1363	754	1388	798	liv	0.98738134
9	1317	684	1365	726	liv	0.94774985
9	325	906	372	954	liv	0.74869937
9	1363	750	1386	796	liv	0.59885406
10	370	892	469	953	liv	1.0
10	449	264	536	339	liv	1.0
10	482	893	531	983	liv	1.0
10	889	46	958	111	liv	1.0
10	996	317	1045	379	liv	1.0
10	494	190	542	267	liv	0.9999999
10	467	178	514	231	liv	0.99999976
10	558	312	618	367	liv	0.99999976
10	403	690	456	754	liv	0.99999976
10	422	35	462	108	liv	0.99999964
10	515	526	576	581	liv	0.99999964
10	1323	280	1376	363	liv	0.9999994
10	455	986	489	1035	liv	0.9999993
10	393	228	450	290	liv	0.99999917
10	363	943	458	978	liv	0.99999845
10	796	497	857	543	liv	0.99999833
10	409	599	451	679	liv	0.99999833
10	966	259	1030	299	liv	0.9999982
10	800	535	856	575	liv	0.9999982
10	529	852	566	902	round	0.9999981
10	538	453	575	487	round	0.999998
10	173	558	203	588	round	0.99999774
10	478	497	526	556	liv	0.9999962
10	367	301	404	340	round	0.99999297
10	499	573	551	628	liv	0.99999213
10	856	205	898	246	round	0.99998987
10	364	985	462	1036	liv	0.99998844
10	464	965	503	994	round	0.9999882
10	1344	554	1387	589	round	0.99998546
10	510	999	550	1032	round	0.99998534
10	424	207	468	252	round	0.99998295
10	378	247	421	300	liv	0.9999801
10	1368	711	1388	755	liv	0.99997723
10	301	94	365	132	liv	0.999941
10	537	308	591	356	liv	0.9998913
10	1301	296	1331	333	round	0.9998229
10	434	476	482	580	liv	0.9998135
10	1319	683	1367	724	liv	0.9979881
10	602	0	632	16	liv	0.9969252
10	384	240	433	296	liv	0.9967566
10	1364	751	1388	802	liv	0.9953101
10	1289	662	1325	710	round	0.9948726
10	324	907	371	953	round	0.98722535
10	569	495	616	541	liv	0.9666316
10	603	0	634	11	liv	0.9297048
10	646	0	678	20	round	0.68000567
11	452	268	534	339	liv	1.0
11	888	47	954	111	liv	1.0
11	997	316	1048	380	liv	1.0
11	365	891	466	955	liv	1.0
11	477	896	531	985	liv	1.0
11	556	311	621	365	liv	0.9999999
11	400	233	455	294	liv	0.9999999
11	407	605	454	682	liv	0.9999999
11	467	178	517	233	liv	0.99999976
11	363	941	457	979	liv	0.99999976
11	514	527	576	580	liv	0.99999964
11	421	32	464	107	liv	0.99999964
11	493	189	542	261	liv	0.9999994
11	799	536	855	577	liv	0.9999994
11	457	988	488	1038	liv	0.9999994
11	1325	282	1376	362	liv	0.9999989
11	965	265	1029	299	liv	0.99999714
11	475	496	522	554	liv	0.9999968
11	171	556	202	587	round	0.9999962
11	500	577	552	627	liv	0.9999957
11	1367	712	1387	756	liv	0.9999944
11	534	307	597	353	liv	0.99999416
11	798	498	855	543	liv	0.99999356
11	376	254	419	303	liv	0.9999924
11	857	206	900	246	round	0.99998784
11	543	445	580	485	round	0.9999851
11	369	984	460	1037	liv	0.9999844
11	1344	551	1386	586	round	0.999982
11	1317	684	1367	723	liv	0.99998164
11	463	962	504	995	round	0.9999814
11	512	999	550	1031	round	0.99997926
11	437	476	480	581	liv	0.99997735
11	366	302	402	339	round	0.99997485
11	527	852	567	902	round	0.9999602
11	425	206	469	253	round	0.9999509
11	1300	296	1330	333	round	0.9994294
11	403	694	456	753	liv	0.9990989
11	324	905	371	949	round	0.98840606
11	300	95	368	133	liv	0.9865181
11	569	495	616	541	liv	0.9811078
11	1293	661	1331	703	round	0.9749196
11	1365	752	1388	802	liv	0.96217024
11	1363	760	1388	802	liv	0.94954306
11	604	0	636	18	liv	0.9232231
11	1362	753	1388	800	liv	0.85140884
11	646	0	678	17	liv	0.8383901
11	603	0	638	15	liv	0.7207663
11	1322	685	1362	725	liv	0.6012866
12	366	893	463	958	liv	1.0
12	995	316	1043	380	liv	1.0
12	469	177	521	232	liv	1.0
12	445	265	536	341	liv	1.0
12	558	312	622	367	liv	1.0
12	889	47	957	113	liv	1.0
12	481	900	532	986	liv	1.0
12	399	233	461	293	liv	1.0
12	533	310	595	353	liv	0.99999976
12	490	192	542	259	liv	0.99999976
12	797	533	858	578	liv	0.99999976
12	514	522	573	584	liv	0.99999964
12	399	692	455	755	liv	0.99999964
12	366	939	450	980	liv	0.9999995
12	409	605	455	678	liv	0.9999995
12	568	495	614	543	liv	0.9999994
12	499	575	551	628	liv	0.9999993
12	1327	281	1375	361	liv	0.9999993
12	456	985	487	1037	liv	0.9999993
12	967	263	1029	299	liv	0.999998
12	173	560	203	590	round	0.999998
12	422	31	463	112	liv	0.9999974
12	511	998	549	1032	round	0.999997
12	798	499	856	543	liv	0.99999666
12	475	497	523	556	liv	0.9999963
12	366	301	403	339	round	0.9999956
12	526	855	566	900	round	0.9999945
12	856	208	899	246	round	0.99999344
12	376	254	419	302	liv	0.9999895
12	1368	711	1387	756	liv	0.99997985
12	1318	686	1369	725	liv	0.9999745
12	376	977	458	1038	liv	0.9999651
12	434	477	480	583	liv	0.99994767
12	323	904	369	951	liv	0.9999379
12	426	206	470	252	round	0.99993384
12	1339	552	1386	588	round	0.9999038
12	544	449	581	489	round	0.9998684
12	304	91	368	132	liv	0.99984896
12	1297	299	1329	334	round	0.9997284
12	605	0	634	19	round	0.99956805
12	1364	747	1388	803	liv	0.99852633
12	463	962	500	994	round	0.9983215
12	647	0	676	19	round	0.9966007
12	1292	659	1336	706	liv	0.9960224
12	454	981	489	1040	liv	0.9936718
13	451	270	537	338	liv	1.0
13	477	892	532	988	liv	1.0
13	534	310	593	353	liv	1.0
13	466	174	522	233	liv	1.0
13	397	235	452	291	liv	1.0
13	371	892	463	955	liv	1.0
13	998	315	1043	380	liv	1.0
13	557	312	619	366	liv	1.0
13	883	46	956	116	liv	0.9999999
13	495	577	553	629	liv	0.9999999
13	513	524	575	583	liv	0.99999976
13	414	608	458	684	liv	0.99999964
13	402	693	451	757	liv	0.9999995
13	967	262	1028	298	liv	0.99999917
13	1287	660	1337	707	liv	0.9999988
13	491	192	542	261	liv	0.99999857
13	1327	280	1375	359	liv	0.99999833
13	799	533	859	578	liv	0.99999785
13	421	33	462	110	liv	0.9999975
13	171	557	202	588	round	0.99999726
13	798	500	856	541	liv	0.99999714
13	366	943	451	978	liv	0.99999666
13	456	986	484	1037	liv	0.99999607
13	562	493	611	540	liv	0.999995
13	856	208	898	246	round	0.9999945
13	376	254	419	301	liv	0.99999344
13	365	300	403	340	round	0.99999285
13	475	498	522	553	liv	0.99999034
13	545	452	580	485	round	0.99999
13	428	207	471	253	round	0.99998546
13	527	854	568	899	round	0.9999845
13	436	476	481	581	liv	0.9999807
13	464	963	502	995	round	0.99997187
13	1339	555	1386	594	round	0.9999647
13	1316	685	1369	725	liv	0.99995756
13	1297	300	1327	334	round	0.99995613
13	1369	712	1388	763	liv	0.99987113
13	511	998	548	1030	round	0.9997837
13	323	904	366	949	round	0.9996062
13	307	86	370	130	liv	0.99959975
13	378	984	455	1037	liv	0.9993487
13	648	0	676	20	round	0.9987197
13	374	911	393	929	dead	0.9969229
13	607	0	638	15	round	0.9967874
13	606	0	636	17	round	0.9917996
13	1362	739	1388	801	liv	0.96624047
14	449	267	538	339	liv	1.0
14	467	171	522	234	liv	1.0
14	395	236	455	296	liv	1.0
14	472	895	532	983	liv	1.0
14	558	315	617	368	liv	0.9999999
14	366	889	466	958	liv	0.9999999
14	491	190	541	262	liv	0.9999999
14	997	317	1044	381	liv	0.9999999
14	515	523	576	582	liv	0.99999976
14	365	940	450	980	liv	0.99999976
14	497	574	552	630	liv	0.99999964
14	413	607	458	685	liv	0.99999964
14	401	696	453	751	liv	0.99999905
14	465	963	501	994	round	0.9999988
14	883	48	950	118	liv	0.9999987
14	524	856	564	894	round	0.99999857
14	478	494	526	565	liv	0.999997
14	1289	661	1337	708	liv	0.9999968
14	968	266	1027	298	liv	0.9999968
14	173	559	202	589	round	0.9999964
14	1319	685	1365	724	liv	0.9999963
14	1327	278	1375	358	liv	0.9999962
14	420	33	460	112	liv	0.99999595
14	564	494	612	542	liv	0.99999595
14	368	983	462	1037	liv	0.999995
14	538	311	590	351	liv	0.9999926
14	364	301	400	340	round	0.9999926
14	856	206	899	248	round	0.99998796
14	438	479	480	580	liv	0.9999875
14	800	535	860	578	liv	0.9999875
14	458	986	490	1038	liv	0.9999856
14	375	251	419	299	liv	0.9999733
14	510	1000	548	1032	round	0.9999702
14	799	499	851	542	liv	0.9999511
14	308	86	366	129	round	0.99994624
14	605	0	632	17	round	0.99981743
14	1341	554	1385	594	round	0.9997658
14	324	905	365	945	round	0.999747
14	549	451	583	482	round	0.9996525
14	428	207	469	253	round	0.99958295
14	647	0	676	20	round	0.99956053
14	1369	716	1388	769	liv	0.9945537
14	1299	298	1329	334	round	0.9629391
14	1359	745	1387	810	liv	0.89569604
14	480	184	532	252	liv	0.85571367
14	1325	686	1361	726	liv	0.5472802
15	453	269	536	337	liv	1.0
15	364	942	454	980	liv	1.0
15	470	171	519	234	liv	1.0
15	392	228	458	286	liv	1.0
15	366	892	464	956	liv	1.0
15	996	318	1045	380	liv	1.0
15	569	498	613	547	liv	0.9999999
15	412	609	463	683	liv	0.9999999
15	558	313	619	366	liv	0.9999999
15	516	525	570	582	liv	0.9999999
15	402	695	458	753	liv	0.9999999
15	885	48	954	126	liv	0.9999999
15	470	896	532	988	liv	0.9999999
15	534	310	594	350	liv	0.9999999
15	494	578	549	629	liv	0.99999976
15	1294	661	1338	711	liv	0.99999976
15	497	187	545	260	liv	0.99999964
15	799	536	857	578	liv	0.99999964
15	475	495	525	568	liv	0.99999917
15	423	34	461	110	liv	0.99999917
15	966	265	1027	300	liv	0.9999989
15	1327	277	1375	358	liv	0.9999987
15	799	500	856	544	liv	0.99999857
15	172	557	204	589	round	0.99999833
15	322	907	366	942	round	0.99999774
15	377	252	420	303	liv	0.99999726
15	364	302	402	341	round	0.9999902
15	555	454	588	484	round	0.99998415
15	857	209	900	252	round	0.9999819
15	1317	685	1366	725	liv	0.9999802
15	1341	553	1385	595	round	0.99997807
15	1369	712	1387	760	liv	0.99997616
15	312	88	363	127	round	0.9999685
15	1360	759	1388	807	liv	0.9999633
15	528	856	570	896	round	0.99995816
15	511	999	547	1032	round	0.9999523
15	428	206	469	251	round	0.9998983
15	439	478	479	580	liv	0.9998355
15	456	995	484	1038	liv	0.99975103
15	464	962	503	995	round	0.99871254
15	372	982	459	1037	liv	0.9975298
15	604	0	640	13	round	0.99074674
15	606	0	637	17	round	0.97913545
15	648	0	677	19	round	0.9764156
15	1300	299	1328	334	round	0.9234821
15	369	914	389	930	dead	0.8643511
15	1324	685	1362	726	liv	0.8468838
15	455	991	486	1040	liv	0.6697861
16	447	270	536	338	liv	1.0
16	477	895	531	988	liv	1.0
16	554	315	619	367	liv	1.0
16	996	319	1045	381	liv	1.0
16	365	891	464	955	liv	1.0
16	470	174	517	234	liv	1.0
16	399	237	458	293	liv	1.0
16	798	533	858	577	liv	0.9999999
16	401	692	459	754	liv	0.9999999
16	365	941	452	981	liv	0.99999976
16	535	314	597	353	liv	0.9999994
16	484	580	549	628	liv	0.9999994
16	884	50	950	120	liv	0.9999994
16	323	905	363	942	round	0.9999994
16	527	857	565	896	round	0.9999994
16	517	524	573	581	liv	0.9999993
16	796	499	854	541	liv	0.9999993
16	961	264	1030	299	liv	0.99999917
16	1317	687	1369	727	liv	0.9999989
16	411	606	459	683	liv	0.9999988
16	419	33	461	110	liv	0.99999857
16	496	188	542	262	liv	0.99999845
16	1327	278	1373	358	liv	0.99999833
16	173	558	202	589	round	0.9999975
16	1359	760	1388	808	liv	0.9999963
16	857	210	898	250	round	0.9999939
16	475	491	527	579	liv	0.9999933
16	373	253	419	302	liv	0.9999919
16	465	963	503	995	round	0.9999888
16	361	987	460	1036	liv	0.99998605
16	1344	552	1385	592	round	0.99998116
16	365	304	403	342	round	0.999979
16	438	478	480	581	liv	0.9999552
16	1291	663	1335	708	liv	0.99994254
16	429	207	468	254	round	0.9999167
16	1367	710	1388	766	liv	0.9999163
16	312	85	366	127	round	0.99989855
16	559	451	596	489	round	0.9998795
16	510	999	547	1033	round	0.9998202
16	568	499	611	542	liv	0.99953854
16	647	0	676	20	round	0.99829024
16	373	914	392	931	dead	0.99827063
16	1301	299	1328	334	round	0.9982425
16	459	993	486	1035	liv	0.99608046
16	606	0	638	16	round	0.8569023
16	606	0	635	19	round	0.6280565
17	448	267	539	339	liv	1.0
17	469	894	530	987	liv	1.0
17	997	320	1048	381	liv	1.0
17	411	608	461	682	liv	1.0
17	398	234	459	291	liv	1.0
17	535	312	593	352	liv	1.0
17	365	942	453	982	liv	0.9999999
17	559	313	619	365	liv	0.9999999
17	366	893	464	956	liv	0.9999999
17	964	265	1031	301	liv	0.99999976
17	518	524	572	582	liv	0.99999976
17	440	479	484	581	liv	0.99999976
17	495	189	541	265	liv	0.99999976
17	322	907	362	944	round	0.99999964
17	401	686	466	750	liv	0.9999994
17	480	495	526	566	liv	0.9999994
17	882	50	952	123	liv	0.9999993
17	364	987	464	1038	liv	0.9999993
17	799	532	855	576	liv	0.99999917
17	468	175	515	237	liv	0.99999917
17	1318	685	1366	726	liv	0.9999989
17	798	498	854	542	liv	0.9999989
17	174	561	205	591	round	0.99999857
17	418	34	460	108	liv	0.99999833
17	1345	555	1386	593	round	0.99999714
17	527	856	567	896	round	0.9999963
17	1291	666	1336	711	liv	0.999995
17	857	210	898	250	round	0.9999949
17	567	498	611	544	liv	0.9999944
17	375	255	420	301	liv	0.99999
17	364	302	402	339	round	0.9999876
17	1368	714	1388	764	liv	0.99998605
17	1328	275	1377	358	liv	0.9999832
17	510	998	548	1032	round	0.999979
17	453	993	484	1037	liv	0.9999682
17	429	209	468	253	round	0.9999652
17	1361	763	1388	810	liv	0.9999188
17	558	451	598	491	round	0.99989104
17	467	964	503	993	round	0.9998871
17	373	913	392	930	dead	0.99974614
17	1300	299	1328	334	round	0.99936396
17	646	0	675	18	round	0.99906594
17	497	576	548	629	liv	0.99690956
17	311	81	363	126	round	0.99276817
17	606	0	637	15	round	0.9543962
17	606	0	635	18	round	0.8433218
17	1323	687	1361	728	liv	0.51028407
18	451	264	540	340	liv	1.0
18	476	893	530	986	liv	1.0
18	996	316	1043	382	liv	1.0
18	398	234	455	290	liv	0.9999999
18	517	523	573	581	liv	0.9999999
18	367	892	463	952	liv	0.9999999
18	557	313	617	366	liv	0.9999999
18	420	34	463	109	liv	0.9999999
18	536	312	595	350	liv	0.99999976
18	363	943	451	983	liv	0.99999976
18	414	610	465	683	liv	0.99999976
18	496	191	542	265	liv	0.99999976
18	469	178	515	235	liv	0.99999964
18	401	683	479	755	liv	0.99999964
18	879	51	952	121	liv	0.9999995
18	1292	664	1337	711	liv	0.9999994
18	963	264	1029	300	liv	0.9999994
18	479	491	527	570	liv	0.9999994
18	1358	757	1388	811	liv	0.9999994
18	456	991	486	1038	liv	0.9999994
18	358	984	455	1035	liv	0.99999917
18	568	499	613	550	liv	0.99999785
18	511	999	548	1032	round	0.99999654
18	857	210	898	250	round	0.9999964
18	362	301	401	341	round	0.99999607
18	527	856	566	897	round	0.9999958
18	316	83	361	124	round	0.99999523
18	172	561	201	591	round	0.99999404
18	463	962	502	994	round	0.9999925
18	1344	553	1386	590	round	0.9999924
18	1325	275	1375	358	liv	0.99998987
18	802	533	857	578	liv	0.99998474
18	797	498	853	543	liv	0.9999846
18	438	479	483	582	liv	0.9999807
18	1318	686	1364	728	liv	0.9999795
18	493	580	547	626	liv	0.99997807
18	323	905	363	942	round	0.9999769
18	1300	298	1328	333	round	0.99997103
18	375	254	417	301	liv	0.99996006
18	428	208	468	254	round	0.9999511
18	1365	716	1388	761	liv	0.99994946
18	562	453	598	492	round	0.9999378
18	371	912	391	930	dead	0.9975473
18	605	0	634	18	round	0.99725634
18	457	986	488	1040	liv	0.67561007
18	645	0	675	20	liv	0.5775962
19	451	263	542	338	liv	1.0
19	880	54	952	129	liv	1.0
19	997	316	1044	382	liv	1.0
19	365	893	466	954	liv	1.0
19	399	692	458	757	liv	1.0
19	401	235	454	293	liv	1.0
19	470	894	528	988	liv	0.9999999
19	533	313	597	350	liv	0.9999999
19	555	311	618	364	liv	0.9999999
19	419	31	460	111	liv	0.9999999
19	413	611	460	676	liv	0.9999999
19	480	490	533	574	liv	0.99999976
19	494	575	546	631	liv	0.99999976
19	520	523	572	581	liv	0.99999976
19	457	985	488	1039	liv	0.99999964
19	495	190	542	264	liv	0.9999994
19	963	265	1029	299	liv	0.9999993
19	355	986	454	1034	liv	0.99999905
19	469	180	514	237	liv	0.9999989
19	440	479	486	582	liv	0.9999989
19	527	857	564	895	round	0.9999989
19	798	498	853	544	liv	0.99999857
19	374	254	420	301	liv	0.99999845
19	1317	685	1366	726	liv	0.99999833
19	319	907	362	946	round	0.99999833
19	801	532	858	577	liv	0.99999785
19	174	560	204	590	round	0.99999785
19	362	942	453	981	liv	0.9999975
19	1358	761	1388	812	liv	0.99999714
19	1290	665	1336	710	liv	0.99999714
19	858	211	900	251	round	0.99999654
19	1345	555	1387	592	round	0.9999962
19	511	1001	549	1032	round	0.99999464
19	1325	277	1374	358	liv	0.9999939
19	363	303	400	342	round	0.99999106
19	564	452	600	490	round	0.9999895
19	315	84	359	124	round	0.9999888
19	1366	710	1387	760	liv	0.99998796
19	567	503	608	546	liv	0.99998665
19	428	209	468	254	round	0.99998116
19	466	963	502	994	round	0.99997246
19	1298	301	1328	334	round	0.999954
19	375	913	393	929	dead	0.99975115
19	647	0	676	20	round	0.9970276
19	607	0	635	18	round	0.99326926
20	450	260	542	338	liv	1.0
20	399	238	456	288	liv	1.0
20	888	54	953	129	liv	1.0
20	403	695	460	757	liv	1.0
20	417	37	461	109	liv	1.0
20	367	942	452	982	liv	0.9999999
20	475	894	532	992	liv	0.9999999
20	533	311	598	353	liv	0.9999999
20	517	521	572	583	liv	0.9999999
20	366	893	467	959	liv	0.9999999
20	998	317	1047	381	liv	0.9999999
20	554	310	618	365	liv	0.9999999
20	413	610	465	682	liv	0.99999976
20	478	492	533	573	liv	0.99999964
20	1321	685	1364	724	liv	0.9999995
20	966	265	1029	301	liv	0.9999994
20	496	190	542	267	liv	0.9999994
20	351	987	459	1034	liv	0.99999917
20	860	211	902	254	round	0.9999989
20	175	559	204	589	round	0.9999981
20	369	256	417	302	liv	0.99999785
20	468	178	512	237	liv	0.9999964
20	1324	277	1374	359	liv	0.9999956
20	439	479	482	583	liv	0.9999938
20	525	857	564	898	round	0.9999927
20	800	536	859	578	liv	0.99999046
20	1356	757	1387	811	liv	0.99998844
20	428	210	468	254	round	0.9999784
20	511	1000	548	1033	round	0.99997556
20	458	987	492	1035	liv	0.99995446
20	362	303	399	339	round	0.9999527
20	1298	300	1327	334	round	0.9999262
20	322	905	364	944	round	0.9999168
20	466	965	503	999	round	0.99983203
20	1344	556	1387	595	round	0.999808
20	566	499	607	542	liv	0.9997446
20	1297	670	1334	708	round	0.9994591
20	647	0	677	21	round	0.99945
20	795	500	851	545	liv	0.9993679
20	373	913	393	930	dead	0.9990526
20	606	0	637	16	round	0.998346
20	563	451	596	490	round	0.99815184
20	495	578	545	631	liv	0.99797255
20	1366	708	1386	762	liv	0.99680007
20	1326	685	1359	725	liv	0.96201754
20	312	83	363	134	round	0.8847153
21	450	266	542	339	liv	1.0
21	890	56	951	130	liv	1.0
21	470	897	529	988	liv	1.0
21	996	319	1046	380	liv	1.0
21	530	309	599	353	liv	1.0
21	395	229	454	290	liv	1.0
21	404	695	461	758	liv	1.0
21	365	943	454	981	liv	0.9999999
21	519	525	572	582	liv	0.9999999
21	479	489	533	569	liv	0.9999999
21	364	894	463	957	liv	0.9999999
21	468	171	514	239	liv	0.9999999
21	556	310	619	367	liv	0.9999999
21	416	612	466	689	liv	0.99999976
21	495	191	540	263	liv	0.99999976
21	565	495	608	540	liv	0.99999976
21	1354	758	1388	818	liv	0.9999994
21	859	212	904	253	round	0.9999994
21	457	990	489	1037	liv	0.99999917
21	962	265	1031	300	liv	0.99999905
21	419	43	461	110	liv	0.99999905
21	524	857	563	898	round	0.99999833
21	356	985	458	1036	liv	0.999998
21	800	534	858	578	liv	0.9999976
21	171	563	202	593	round	0.9999976
21	538	308	609	358	liv	0.99999714
21	324	907	364	942	round	0.99999607
21	441	481	481	579	liv	0.99999475
21	1346	556	1386	597	round	0.99999166
21	1325	276	1376	359	liv	0.9999895
21	797	498	855	544	liv	0.99998844
21	1319	689	1363	727	liv	0.99998033
21	510	1001	548	1033	round	0.9999802
21	362	302	398	339	round	0.99997973
21	468	965	503	1000	round	0.99997497
21	372	257	419	303	liv	0.99996734
21	1298	301	1327	336	round	0.99996316
21	566	447	596	486	dead	0.9999455
21	1366	711	1387	758	liv	0.9996871
21	1293	669	1336	711	liv	0.9996151
21	427	211	467	253	round	0.9995995
21	647	0	675	20	round	0.9991259
21	606	0	637	15	round	0.9983103
21	606	0	635	17	round	0.9961809
21	371	912	389	928	dead	0.9931096
21	492	578	543	633	liv	0.961253
21	312	83	361	131	round	0.8670201
22	363	896	464	952	liv	1.0
22	885	54	951	130	liv	1.0
22	552	310	618	365	liv	1.0
22	448	267	544	339	liv	1.0
22	398	695	459	759	liv	1.0
22	474	895	532	988	liv	1.0
22	529	310	595	351	liv	1.0
22	479	484	536	573	liv	0.9999999
22	415	610	463	681	liv	0.9999999
22	519	524	571	584	liv	0.9999999
22	997	317	1042	381	liv	0.9999999
22	368	251	420	302	liv	0.99999976
22	355	985	457	1035	liv	0.99999976
22	394	230	451	287	liv	0.99999964
22	468	175	513	240	liv	0.99999964
22	495	191	541	262	liv	0.9999994
22	965	266	1032	300	liv	0.9999993
22	859	210	903	254	round	0.99999917
22	800	532	857	577	liv	0.99999845
22	325	908	364	944	round	0.99999785
22	418	42	463	107	liv	0.99999774
22	442	483	485	585	liv	0.9999975
22	525	858	563	898	round	0.99999714
22	1349	752	1388	821	liv	0.999997
22	172	561	202	590	round	0.99999464
22	311	85	361	127	round	0.9999943
22	1347	557	1387	600	round	0.9999937
22	1325	273	1377	358	liv	0.9999907
22	1316	685	1363	724	liv	0.9999857
22	365	944	458	981	liv	0.9999796
22	468	966	501	998	round	0.9999696
22	490	581	541	633	liv	0.9999689
22	428	212	466	254	round	0.9999634
22	1299	301	1329	336	round	0.99996066
22	359	301	397	340	round	0.9999497
22	512	1001	548	1032	round	0.9999255
22	800	499	855	541	liv	0.9998437
22	1364	713	1388	760	liv	0.99965525
22	457	987	495	1034	liv	0.99932873
22	1365	710	1387	757	liv	0.99753064
22	370	910	389	926	dead	0.99624
22	1300	671	1335	707	round	0.98634154
22	607	0	637	16	round	0.96990865
22	606	0	634	17	round	0.9405523
22	565	504	610	543	liv	0.92437315
22	566	451	606	488	round	0.6912298
22	645	0	675	21	round	0.52826786
23	451	263	543	338	liv	1.0
23	531	312	596	353	liv	1.0
23	551	311	618	365	liv	1.0
23	886	53	949	125	liv	1.0
23	474	895	529	989	liv	1.0
23	414	611	465	686	liv	1.0
23	997	317	1043	381	liv	1.0
23	392	703	453	760	liv	1.0
23	387	225	446	278	liv	1.0
23	520	525	572	581	liv	0.9999999
23	480	481	535	576	liv	0.9999999
23	366	895	465	955	liv	0.99999976
23	467	175	514	237	liv	0.99999964
23	799	532	863	577	liv	0.99999964
23	356	984	462	1035	liv	0.99999964
23	497	192	543	263	liv	0.9999995
23	324	907	363	945	round	0.9999995
23	365	944	454	982	liv	0.9999989
23	442	482	489	585	liv	0.9999989
23	962	264	1030	300	liv	0.9999989
23	859	212	902	254	round	0.99999845
23	421	41	460	110	liv	0.99999785
23	797	499	854	542	liv	0.9999976
23	1354	758	1388	816	liv	0.9999968
23	527	857	564	897	round	0.9999968
23	172	560	202	589	round	0.9999931
23	315	88	359	126	round	0.9999914
23	1326	274	1377	358	liv	0.99999034
23	1346	557	1386	601	round	0.99998724
23	369	257	418	309	liv	0.99998355
23	1320	685	1364	726	liv	0.9999815
23	429	212	467	252	round	0.999979
23	488	582	541	634	liv	0.9999732
23	467	964	503	996	round	0.9998914
23	361	300	399	338	round	0.99989116
23	513	1002	548	1033	round	0.9998753
23	1299	299	1329	334	round	0.99986887
23	456	986	499	1037	liv	0.99967456
23	1365	714	1388	761	liv	0.9992779
23	646	0	675	20	round	0.9991198
23	373	914	390	929	dead	0.9968966
23	564	503	610	543	liv	0.99247897
23	1299	671	1334	709	round	0.9920284
23	570	452	601	486	round	0.94761145
23	606	0	637	18	round	0.84239763
24	473	895	532	990	liv	1.0
24	547	309	619	362	liv	1.0
24	366	896	462	958	liv	1.0
24	451	267	544	337	liv	0.9999999
24	405	693	458	754	liv	0.9999999
24	895	54	954	128	liv	0.9999999
24	416	610	466	684	liv	0.9999999
24	525	308	601	352	liv	0.9999999
24	384	221	448	278	liv	0.99999976
24	520	527	570	584	liv	0.99999976
24	477	479	540	575	liv	0.99999976
24	466	174	513	234	liv	0.99999964
24	323	908	362	944	round	0.99999964
24	496	191	542	264	liv	0.9999995
24	999	320	1047	381	liv	0.9999995
24	799	533	859	578	liv	0.9999995
24	442	481	488	584	liv	0.99999917
24	965	266	1029	298	liv	0.9999989
24	860	213	900	253	round	0.9999989
24	366	942	451	983	liv	0.99999857
24	357	984	462	1035	liv	0.99999833
24	1348	557	1386	603	round	0.9999958
24	368	257	422	309	liv	0.9999957
24	172	560	202	588	round	0.9999925
24	316	86	359	126	round	0.99999225
24	420	48	465	110	liv	0.99999034
24	1352	761	1387	820	liv	0.9999896
24	797	498	857	543	liv	0.9999888
24	526	853	565	898	round	0.99998784
24	431	211	467	252	round	0.9999851
24	1325	272	1381	358	liv	0.9999839
24	1320	688	1363	724	liv	0.9999839
24	571	453	603	483	round	0.99997914
24	361	300	398	338	round	0.99997723
24	468	965	504	998	round	0.99994504
24	514	1000	548	1032	round	0.99989974
24	457	987	500	1036	liv	0.99981886
24	1299	300	1329	336	round	0.99969244
24	1299	671	1335	710	round	0.99955946
24	374	912	392	927	dead	0.9994216
24	647	0	678	21	round	0.9993173
24	1367	711	1388	761	liv	0.99521905
24	604	0	639	20	liv	0.9735711
24	603	0	641	16	liv	0.96144605
24	566	505	610	547	round	0.92248476
24	490	582	541	639	liv	0.7692252
24	491	583	539	639	round	0.5974175
24	1326	688	1358	726	liv	0.53317136
25	363	896	463	955	liv	1.0
25	891	60	951	135	liv	1.0
25	393	699	457	759	liv	1.0
25	449	266	543	340	liv	1.0
25	480	895	535	990	liv	1.0
25	541	308	620	362	liv	1.0
25	415	611	465	684	liv	1.0
25	368	258	422	308	liv	1.0
25	488	588	542	649	liv	0.9999999
25	463	174	514	239	liv	0.9999999
25	383	223	440	282	liv	0.9999999
25	478	481	537	575	liv	0.9999999
25	795	532	856	578	liv	0.99999976
25	495	197	544	263	liv	0.99999964
25	997	320	1045	382	liv	0.9999994
25	358	985	460	1036	liv	0.9999993
25	322	908	364	945	round	0.9999993
25	365	944	454	981	liv	0.99999917
25	958	266	1032	301	liv	0.9999988
25	518	527	568	582	liv	0.9999987
25	800	493	857	543	liv	0.99999845
25	1352	757	1388	822	liv	0.99999833
25	862	211	902	252	round	0.99999833
25	440	482	488	582	liv	0.999998
25	526	854	563	899	round	0.99999535
25	1320	686	1366	725	liv	0.99999154
25	1344	557	1385	605	round	0.9999913
25	171	560	201	589	round	0.9999887
25	363	304	399	339	round	0.99998295
25	312	91	357	132	round	0.9999782
25	1324	272	1382	359	liv	0.99997735
25	512	999	548	1032	round	0.99997485
25	459	988	498	1035	liv	0.9999721
25	1298	302	1328	338	round	0.9999721
25	527	309	604	351	liv	0.9999671
25	429	211	469	254	round	0.999967
25	1366	713	1387	758	liv	0.99996555
25	465	963	501	995	round	0.9998677
25	571	450	599	483	round	0.9997049
25	604	0	639	20	liv	0.9992513
25	602	0	637	23	liv	0.9979709
25	374	912	390	927	dead	0.9965239
25	1299	672	1334	710	round	0.9959591
25	421	47	461	106	liv	0.9902445
25	1325	687	1360	725	liv	0.9759424
25	643	0	677	21	round	0.91427696
25	567	502	610	544	round	0.86677045
26	443	264	542	345	liv	1.0
26	894	59	953	135	liv	1.0
26	475	898	534	987	liv	1.0
26	404	699	464	754	liv	1.0
26	997	318	1046	380	liv	1.0
26	465	172	513	242	liv	1.0
26	415	613	462	685	liv	1.0
26	549	308	621	365	liv	0.9999999
26	360	896	463	952	liv	0.9999999
26	495	196	540	264	liv	0.9999999
26	519	528	567	583	liv	0.9999999
26	479	480	542	562	liv	0.9999999
26	384	225	443	289	liv	0.99999976
26	488	586	545	650	liv	0.99999964
26	438	478	487	582	liv	0.9999995
26	797	534	858	578	liv	0.99999917
26	531	308	598	350	liv	0.99999917
26	526	854	565	896	round	0.99999905
26	324	909	362	946	round	0.9999982
26	1353	759	1387	820	liv	0.9999981
26	862	211	903	252	round	0.99999774
26	362	984	458	1036	liv	0.9999976
26	174	559	203	589	round	0.99999666
26	513	998	549	1032	round	0.99999607
26	966	267	1031	300	liv	0.9999943
26	800	495	859	547	liv	0.999992
26	363	303	399	339	round	0.99999154
26	422	47	462	109	liv	0.9999912
26	1299	302	1328	337	round	0.9999839
26	373	255	421	301	liv	0.99998367
26	314	88	358	128	round	0.99998236
26	1316	688	1365	725	liv	0.9999808
26	1322	273	1383	357	liv	0.9999509
26	428	211	467	253	round	0.9999336
26	1300	671	1335	710	round	0.99986434
26	569	449	602	480	round	0.9997671
26	466	965	501	996	round	0.99955374
26	1366	712	1387	757	liv	0.99951863
26	1342	556	1385	606	round	0.9994941
26	601	0	644	32	liv	0.9993907
26	366	944	452	980	liv	0.99918145
26	373	910	394	930	dead	0.99586594
26	457	988	501	1035	liv	0.99576086
26	1365	713	1388	761	liv	0.99118525
26	569	503	609	544	round	0.9546171
26	638	0	674	19	round	0.53393424
27	441	262	541	345	liv	1.0
27	894	65	952	140	liv	1.0
27	362	895	462	952	liv	1.0
27	483	473	541	562	liv	1.0
27	998	318	1043	379	liv	1.0
27	467	175	514	238	liv	0.9999999
27	487	583	548	647	liv	0.9999999
27	517	530	567	582	liv	0.9999999
27	477	897	537	989	liv	0.9999999
27	367	260	421	307	liv	0.99999976
27	438	481	489	580	liv	0.99999964
27	418	614	464	684	liv	0.99999964
27	492	192	541	262	liv	0.99999964
27	1353	757	1387	822	liv	0.99999917
27	325	911	362	946	round	0.99999905
27	377	224	439	278	liv	0.9999989
27	362	983	459	1036	liv	0.9999988
27	402	703	459	755	liv	0.9999987
27	173	558	204	589	round	0.99999845
27	542	300	629	368	liv	0.99999833
27	527	856	563	895	round	0.9999982
27	964	266	1032	300	liv	0.999998
27	798	534	858	577	liv	0.99999666
27	1345	559	1386	604	round	0.99999523
27	422	47	463	106	liv	0.99998593
27	866	211	907	252	round	0.99997973
27	430	211	468	255	round	0.99996626
27	1301	671	1333	708	round	0.9999641
27	529	307	597	348	liv	0.9999548
27	313	90	357	126	round	0.99994695
27	362	302	400	339	round	0.9999434
27	1301	302	1331	336	round	0.99990356
27	459	986	504	1034	liv	0.9998442
27	366	945	454	979	liv	0.9998404
27	573	450	603	482	round	0.99975294
27	1324	272	1382	354	liv	0.9995552
27	603	0	645	30	liv	0.999474
27	1367	716	1388	759	liv	0.99942565
27	1322	688	1366	725	liv	0.99940467
27	569	502	609	542	round	0.99939644
27	801	499	856	542	liv	0.9992487
27	464	964	502	995	round	0.99912876
27	511	995	552	1033	round	0.9983912
27	370	913	387	928	dead	0.9592397
27	644	0	679	22	liv	0.6868189
28	443	263	540	344	liv	1.0
28	360	894	462	957	liv	1.0
28	475	897	532	987	liv	1.0
28	480	479	542	565	liv	1.0
28	416	613	464	685	liv	1.0
28	889	66	956	137	liv	1.0
28	377	222	451	286	liv	1.0
28	468	172	514	239	liv	0.9999999
28	492	194	541	263	liv	0.9999995
28	551	304	628	366	liv	0.9999995
28	516	531	568	580	liv	0.9999994
28	798	534	859	578	liv	0.9999993
28	368	255	421	307	liv	0.99999917
28	439	483	485	579	liv	0.9999989
28	866	212	911	252	round	0.9999989
28	407	702	462	752	liv	0.9999988
28	367	946	449	980	liv	0.99999857
28	368	983	461	1038	liv	0.99999857
28	322	913	359	950	round	0.99999857
28	526	856	563	895	round	0.99999857
28	531	307	601	350	liv	0.99999845
28	174	562	206	592	round	0.99999833
28	1354	753	1388	820	liv	0.9999981
28	998	319	1043	380	liv	0.9999964
28	1344	557	1386	601	round	0.999992
28	363	302	400	339	round	0.99999094
28	430	211	469	253	round	0.9999883
28	1300	673	1332	710	round	0.9999864
28	1324	272	1381	357	liv	0.9999794
28	420	47	462	107	liv	0.9999777
28	964	266	1028	300	liv	0.9999777
28	491	588	549	646	liv	0.99997187
28	312	91	358	131	round	0.99996006
28	1300	302	1329	337	round	0.9999473
28	1367	716	1386	755	liv	0.99974126
28	469	966	503	995	round	0.99928135
28	572	449	600	483	round	0.9990097
28	607	0	648	33	liv	0.9988403
28	1365	721	1388	758	liv	0.9974632
28	1323	687	1366	726	liv	0.9951245
28	457	987	514	1038	liv	0.9857524
28	511	1000	547	1034	round	0.9364046
28	640	0	677	22	liv	0.87908894
28	568	501	607	542	round	0.7943867
28	368	912	386	926	dead	0.77991694
28	801	499	854	543	liv	0.69939774
28	802	499	853	542	round	0.58230174
29	448	267	541	341	liv	1.0
29	498	589	549	662	liv	1.0
29	365	225	446	280	liv	1.0
29	362	894	462	956	liv	1.0
29	891	68	955	133	liv	1.0
29	481	477	543	562	liv	1.0
29	369	259	425	309	liv	1.0
29	467	176	515	237	liv	0.9999999
29	465	895	536	985	liv	0.9999999
29	999	319	1046	380	liv	0.9999999
29	416	613	470	690	liv	0.99999976
29	439	482	487	578	liv	0.99999964
29	495	194	541	262	liv	0.99999964
29	321	911	358	951	round	0.99999857
29	363	985	464	1036	liv	0.9999982
29	174	562	204	590	round	0.9999969
29	1354	758	1387	827	liv	0.9999968
29	798	536	857	577	liv	0.9999957
29	869	211	914	251	round	0.99999535
29	363	302	400	341	round	0.9999938
29	525	855	566	899	round	0.99999356
29	428	213	468	255	round	0.99999285
29	546	297	632	367	liv	0.9999882
29	419	48	463	108	liv	0.9999845
29	313	90	356	127	round	0.9999844
29	965	267	1027	301	liv	0.99998105
29	368	946	452	979	liv	0.99997365
29	517	531	568	581	liv	0.9999715
29	1299	301	1329	335	round	0.9999645
29	1366	716	1386	755	liv	0.9999552
29	1324	273	1380	355	liv	0.9999503
29	530	307	597	348	liv	0.999941
29	1341	555	1383	602	round	0.99991477
29	1302	672	1336	710	round	0.99985695
29	1364	718	1388	759	liv	0.99973804
29	461	987	501	1035	liv	0.9994764
29	607	0	645	33	liv	0.9992988
29	800	497	857	545	liv	0.9990963
29	469	965	503	997	round	0.99808407
29	566	502	609	543	round	0.9972161
29	370	913	388	929	dead	0.99632275
29	1322	685	1367	725	liv	0.9943111
29	571	450	600	481	dead	0.9914977
29	409	706	456	752	round	0.989134
29	512	1000	548	1033	round	0.92513645
29	458	994	500	1031	liv	0.8521309
29	645	0	679	24	liv	0.525685
30	448	267	543	341	liv	1.0
30	896	63	954	139	liv	1.0
30	470	895	532	986	liv	1.0
30	479	476	541	571	liv	1.0
30	372	260	429	313	liv	1.0
30	367	896	462	956	liv	0.9999999
30	499	590	547	655	liv	0.99999976
30	468	173	513	240	liv	0.99999976
30	367	983	463	1038	liv	0.99999976
30	797	536	857	576	liv	0.9999993
30	365	945	453	981	liv	0.99999905
30	440	482	485	580	liv	0.99999905
30	418	613	466	686	liv	0.9999989
30	321	909	360	949	round	0.9999987
30	363	232	446	279	liv	0.99999857
30	177	559	205	588	round	0.99999845
30	517	531	569	582	liv	0.9999981
30	523	856	566	896	round	0.99999714
30	995	324	1046	380	liv	0.9999969
30	869	212	915	251	round	0.9999964
30	490	195	541	262	liv	0.9999957
30	428	211	467	254	round	0.9999925
30	797	497	855	543	liv	0.99999106
30	1300	672	1334	711	round	0.999987
30	1300	302	1329	337	round	0.9999807
30	968	266	1029	303	liv	0.99998033
30	535	300	634	364	liv	0.9999802
30	458	986	502	1033	liv	0.9999784
30	1352	761	1387	826	liv	0.99997425
30	1323	273	1380	355	liv	0.99997354
30	421	45	461	108	liv	0.99992824
30	1324	685	1366	724	round	0.9999056
30	522	304	609	353	liv	0.9998171
30	1366	715	1387	756	liv	0.99972755
30	564	503	614	542	liv	0.99971956
30	1340	555	1383	601	round	0.9996443
30	362	303	400	338	round	0.99956447
30	609	0	651	29	liv	0.998662
30	468	966	502	997	round	0.9976683
30	572	450	602	481	round	0.9964097
30	457	992	500	1031	liv	0.98914635
30	642	0	680	23	liv	0.9857064
30	510	1001	548	1032	round	0.96544003
30	405	701	459	752	liv	0.83539224
30	313	92	361	133	round	0.79129386
30	370	914	388	927	dead	0.5951154
31	440	264	541	346	liv	1.0
31	367	896	461	956	liv	1.0
31	478	479	544	572	liv	1.0
31	471	899	537	987	liv	1.0
31	895	64	953	137	liv	1.0
31	493	594	551	663	liv	1.0
31	465	176	513	240	liv	1.0
31	360	985	458	1037	liv	1.0
31	998	319	1044	380	liv	0.99999976
31	372	231	439	278	liv	0.99999976
31	402	706	458	762	liv	0.99999976
31	417	616	472	688	liv	0.9999994
31	374	268	433	312	liv	0.9999993
31	798	536	853	577	liv	0.9999993
31	490	194	543	263	liv	0.9999989
31	368	945	451	981	liv	0.9999989
31	871	214	920	251	round	0.99999833
31	173	556	203	587	round	0.9999981
31	967	266	1033	302	liv	0.9999975
31	440	485	487	579	liv	0.99999714
31	521	857	564	896	round	0.99999714
31	527	307	598	350	liv	0.99999666
31	1353	761	1387	828	liv	0.99999595
31	322	914	357	948	round	0.9999957
31	467	966	501	998	round	0.99999344
31	1299	303	1329	338	round	0.99999285
31	427	212	468	255	round	0.9999912
31	545	300	634	365	liv	0.99998546
31	1300	670	1334	711	round	0.999966
31	312	90	359	129	round	0.99993527
31	1323	273	1380	355	liv	0.9999279
31	801	498	857	547	liv	0.99992526
31	364	301	400	338	round	0.9998934
31	540	305	627	360	liv	0.99986756
31	1319	685	1367	725	liv	0.99975413
31	458	988	500	1034	liv	0.9997291
31	512	1001	547	1032	round	0.9994611
31	421	49	461	106	liv	0.99925274
31	520	532	567	582	liv	0.996222
31	1365	718	1388	761	liv	0.992274
31	1341	555	1381	599	round	0.98775804
31	1366	717	1387	756	liv	0.98634446
31	563	505	604	541	round	0.9793714
31	370	913	388	927	dead	0.97024125
31	574	451	602	486	round	0.9642745
31	606	0	648	31	liv	0.8603464
31	641	0	678	23	liv	0.6717229
32	450	266	543	339	liv	1.0
32	464	168	514	241	liv	1.0
32	479	477	542	570	liv	1.0
32	496	586	551	657	liv	1.0
32	473	898	535	990	liv	1.0
32	894	65	954	134	liv	1.0
32	367	895	460	956	liv	0.9999999
32	367	946	453	981	liv	0.99999964
32	996	321	1043	380	liv	0.99999964
32	492	195	542	263	liv	0.99999917
32	418	618	470	688	liv	0.99999857
32	546	299	628	366	liv	0.99999857
32	797	535	852	577	liv	0.9999982
32	176	560	204	590	round	0.9999982
32	324	913	360	949	round	0.99999774
32	440	482	486	579	liv	0.9999974
32	873	214	921	251	round	0.9999974
32	361	984	458	1038	liv	0.99999726
32	969	267	1033	301	liv	0.9999969
32	370	259	433	309	liv	0.9999949
32	519	856	563	898	round	0.9999927
32	1300	672	1333	710	round	0.99999
32	1355	764	1386	827	liv	0.9999883
32	518	528	567	582	liv	0.9999871
32	466	965	501	997	round	0.9999871
32	428	212	467	253	round	0.9999856
32	420	48	463	107	liv	0.99998283
32	362	299	401	336	round	0.99996555
32	1301	301	1330	336	round	0.9999596
32	312	92	362	130	round	0.9999523
32	567	503	603	541	round	0.99993455
32	363	220	442	279	liv	0.9999242
32	801	498	856	545	liv	0.9999114
32	1325	272	1382	355	liv	0.9999002
32	521	306	597	350	liv	0.99989855
32	512	1000	547	1034	round	0.99967253
32	1338	552	1385	597	liv	0.99935836
32	539	304	627	362	liv	0.9992305
32	1366	718	1387	759	liv	0.9991868
32	460	986	503	1034	liv	0.99886155
32	373	267	431	310	liv	0.9987363
32	571	448	605	484	round	0.9985569
32	1323	684	1363	725	round	0.9974874
32	1364	720	1388	763	liv	0.996394
32	455	994	505	1029	liv	0.9946467
32	372	912	389	926	dead	0.9913148
32	610	0	648	28	round	0.97669685
32	404	702	459	754	liv	0.9679194
32	640	0	678	23	liv	0.938545
32	458	988	507	1032	liv	0.82046723
32	459	990	499	1029	liv	0.72284627
32	1325	680	1355	725	round	0.5305582
33	449	266	541	340	liv	1.0
33	895	68	952	136	liv	1.0
33	479	484	547	567	liv	1.0
33	365	892	461	960	liv	1.0
33	371	218	440	276	liv	1.0
33	494	587	553	662	liv	0.9999999
33	468	895	536	989	liv	0.9999999
33	465	174	512	240	liv	0.9999999
33	370	947	451	981	liv	0.99999976
33	374	267	435	310	liv	0.99999964
33	322	910	360	947	round	0.99999964
33	363	985	460	1038	liv	0.9999994
33	492	196	542	264	liv	0.99999917
33	418	618	471	691	liv	0.9999987
33	873	217	923	254	round	0.9999987
33	998	319	1044	381	liv	0.99999857
33	404	704	458	756	liv	0.99999845
33	549	300	629	369	liv	0.99999833
33	175	561	204	589	round	0.999997
33	430	213	466	255	round	0.9999962
33	418	47	462	108	liv	0.9999943
33	518	858	561	896	round	0.99999106
33	1300	302	1330	337	round	0.9999908
33	514	1000	547	1033	round	0.9999889
33	516	529	567	583	liv	0.9999888
33	1342	555	1385	597	round	0.99998784
33	466	964	503	998	round	0.9999871
33	1323	271	1382	357	liv	0.9999858
33	525	307	594	353	liv	0.99998546
33	1356	765	1386	830	liv	0.999982
33	314	92	363	130	round	0.9999808
33	438	485	481	575	liv	0.9998481
33	1301	672	1332	706	round	0.9998344
33	569	449	613	485	round	0.99977344
33	363	298	401	336	round	0.99973506
33	1320	686	1367	728	liv	0.9992194
33	460	987	502	1035	liv	0.99873847
33	800	498	856	545	liv	0.9982603
33	645	0	679	23	round	0.9981477
33	798	538	851	575	liv	0.99742377
33	567	505	606	545	round	0.9968309
33	971	268	1022	307	round	0.993288
33	1324	685	1360	728	liv	0.97998023
33	1366	721	1386	758	liv	0.9774979
33	369	912	387	926	dead	0.96876836
33	456	993	502	1032	liv	0.8615697
33	372	273	425	313	liv	0.81472546
33	608	0	646	30	round	0.77465606
34	447	264	543	341	liv	1.0
34	367	947	451	984	liv	1.0
34	492	591	560	662	liv	1.0
34	894	66	953	137	liv	1.0
34	482	479	547	556	liv	1.0
34	466	174	513	239	liv	1.0
34	357	985	460	1036	liv	1.0
34	997	319	1042	380	liv	1.0
34	369	892	458	956	liv	0.9999999
34	360	222	443	271	liv	0.9999999
34	474	899	536	990	liv	0.9999999
34	321	909	360	946	round	0.9999993
34	492	197	541	263	liv	0.99999917
34	418	618	474	692	liv	0.99999917
34	1355	761	1387	827	liv	0.99999905
34	517	860	558	896	round	0.999998
34	876	215	922	252	round	0.99999666
34	175	561	205	590	round	0.9999964
34	366	253	437	311	liv	0.99999595
34	1343	554	1384	594	round	0.9999956
34	464	965	502	996	round	0.99999356
34	427	214	467	254	round	0.9999931
34	551	298	628	366	liv	0.99999285
34	313	93	360	130	round	0.99999034
34	1301	303	1332	339	round	0.9999893
34	363	299	403	337	round	0.99998796
34	439	517	478	562	round	0.9999832
34	514	1000	548	1033	round	0.99998164
34	419	52	463	106	liv	0.99997807
34	1325	275	1381	357	liv	0.99996257
34	521	304	602	352	liv	0.9999616
34	1318	685	1364	725	liv	0.9999304
34	517	532	569	584	liv	0.9998294
34	801	496	854	546	liv	0.9998103
34	570	505	604	545	round	0.99944884
34	454	984	507	1033	liv	0.9992029
34	799	535	850	576	liv	0.99915135
34	1306	673	1339	706	round	0.9979366
34	407	701	456	752	round	0.9976676
34	1367	717	1387	755	liv	0.99766624
34	531	303	614	360	liv	0.99386567
34	451	993	507	1029	liv	0.9795014
34	571	442	621	482	dead	0.97646296
34	459	987	503	1028	liv	0.9553715
34	611	0	651	19	liv	0.93712366
34	971	267	1024	308	liv	0.9295883
34	1321	684	1357	725	liv	0.9286862
34	363	241	438	300	liv	0.84425277
34	642	0	680	22	round	0.73622066
34	370	262	434	310	liv	0.67898333
35	443	262	542	344	liv	1.0
35	365	947	452	985	liv	1.0
35	483	476	545	560	liv	1.0
35	895	70	954	138	liv	1.0
35	475	895	534	990	liv	0.9999999
35	494	592	552	660	liv	0.9999999
35	367	892	458	954	liv	0.9999999
35	463	177	512	239	liv	0.99999976
35	373	256	447	311	liv	0.99999976
35	351	982	457	1033	liv	0.9999994
35	324	909	360	946	round	0.9999994
35	492	197	548	264	liv	0.9999993
35	418	619	474	692	liv	0.9999988
35	1354	758	1387	826	liv	0.9999987
35	875	214	923	253	round	0.99999833
35	519	859	558	897	round	0.9999981
35	427	214	468	255	round	0.999998
35	177	563	206	592	round	0.9999975
35	552	299	630	368	liv	0.9999964
35	1344	554	1385	594	round	0.99999475
35	440	516	479	560	round	0.99999166
35	365	296	404	335	round	0.9999912
35	361	219	435	267	liv	0.9999901
35	512	1001	548	1033	round	0.9999776
35	465	964	501	997	round	0.99997675
35	1302	302	1332	337	round	0.9999739
35	313	92	360	128	round	0.9999591
35	523	306	596	351	liv	0.99993896
35	417	50	461	105	liv	0.9999008
35	574	443	607	481	dead	0.9998889
35	1319	271	1382	355	liv	0.9995882
35	518	532	567	584	liv	0.99815136
35	407	706	456	753	round	0.9976872
35	460	989	499	1026	liv	0.9895419
35	968	268	1023	305	round	0.9893345
35	1366	718	1388	754	round	0.9868885
35	460	984	502	1033	liv	0.9740007
35	1309	672	1361	722	round	0.95120525
35	633	1	681	23	liv	0.9506478
35	569	505	610	551	round	0.908723
35	800	535	848	575	liv	0.8995132
35	999	321	1047	379	round	0.80415875
35	800	499	852	543	liv	0.7728987
35	455	994	504	1028	liv	0.5738726
35	459	986	506	1028	liv	0.5657155
36	442	266	545	343	liv	1.0
36	889	64	953	137	liv	1.0
36	458	168	514	241	liv	1.0
36	367	896	457	952	liv	1.0
36	482	479	541	559	liv	1.0
36	496	593	556	664	liv	0.9999999
36	478	899	537	987	liv	0.99999976
36	322	910	362	947	round	0.99999976
36	372	254	444	305	liv	0.9999995
36	368	948	453	983	liv	0.9999993
36	494	198	543	266	liv	0.9999993
36	800	497	859	547	liv	0.99999917
36	362	222	433	267	liv	0.99999917
36	418	622	470	690	liv	0.9999988
36	553	300	627	369	liv	0.99999833
36	464	963	498	997	round	0.99999833
36	874	214	924	252	round	0.99999774
36	176	562	205	591	round	0.999997
36	996	319	1050	381	liv	0.9999956
36	1343	555	1385	598	round	0.99999344
36	429	214	468	257	round	0.9999906
36	366	296	404	334	round	0.9999887
36	520	308	599	352	liv	0.9999876
36	355	980	458	1034	liv	0.9999845
36	441	516	479	560	round	0.99998283
36	1301	303	1332	338	round	0.9999802
36	1352	758	1386	835	liv	0.99996877
36	403	706	459	755	liv	0.99996746
36	313	93	360	130	round	0.99996734
36	519	859	560	898	round	0.999954
36	1367	714	1388	758	liv	0.99995387
36	513	1001	547	1032	round	0.99992776
36	567	503	605	541	round	0.9998951
36	968	266	1025	303	liv	0.9997327
36	1320	273	1380	356	liv	0.99961567
36	796	537	846	576	liv	0.9988689
36	414	51	462	107	liv	0.9988417
36	1308	669	1359	712	round	0.9967704
36	462	988	495	1033	liv	0.9962871
36	519	533	569	586	liv	0.9957628
36	460	992	496	1029	liv	0.99542624
36	458	995	498	1028	liv	0.993796
36	537	305	614	362	liv	0.98892015
36	571	439	612	482	dead	0.98851204
36	627	0	679	23	liv	0.96314824
36	613	0	666	25	liv	0.9373893
36	367	913	387	927	dead	0.861815
36	1318	689	1362	722	round	0.7509131
37	442	265	542	342	liv	1.0
37	368	894	456	953	liv	1.0
37	359	984	454	1035	liv	1.0
37	464	171	514	241	liv	1.0
37	474	896	539	986	liv	1.0
37	370	947	451	985	liv	1.0
37	893	67	953	140	liv	1.0
37	363	220	432	269	liv	1.0
37	495	595	556	666	liv	0.9999999
37	479	482	541	558	liv	0.9999999
37	408	706	464	753	liv	0.99999976
37	369	256	435	304	liv	0.99999976
37	489	197	545	264	liv	0.9999994
37	321	911	358	950	round	0.99999917
37	548	301	628	369	liv	0.99999833
37	872	213	921	252	round	0.99999726
37	175	563	205	593	round	0.9999969
37	420	625	475	696	liv	0.9999968
37	518	860	560	898	round	0.9999945
37	428	213	468	253	round	0.9999938
37	442	516	480	559	round	0.99999225
37	1301	304	1332	339	round	0.99999106
37	1353	760	1387	834	liv	0.99999094
37	513	1000	548	1034	round	0.9999908
37	465	965	500	996	round	0.9999887
37	799	497	854	545	liv	0.9999845
37	999	319	1049	381	liv	0.9999815
37	1343	554	1384	597	round	0.9999802
37	313	93	362	132	round	0.9999801
37	971	267	1022	305	round	0.99997115
37	524	308	602	353	liv	0.99996305
37	1324	273	1381	355	liv	0.9999608
37	567	505	603	541	round	0.99991214
37	368	298	405	335	round	0.9998872
37	414	50	460	108	liv	0.9997322
37	461	987	501	1036	liv	0.99784994
37	519	534	570	583	liv	0.9961433
37	1305	670	1350	711	round	0.987377
37	573	446	608	480	round	0.98608357
37	1367	717	1388	757	liv	0.96584743
37	800	540	842	575	round	0.929892
37	616	1	680	22	liv	0.8936332
37	1312	674	1363	721	liv	0.868936
37	458	993	504	1032	liv	0.83862174
37	1320	671	1355	723	liv	0.8337791
37	1306	674	1361	717	round	0.7306124
37	1306	669	1343	710	round	0.65149844
37	799	537	843	575	liv	0.511854
38	441	262	542	344	liv	1.0
38	891	65	953	140	liv	1.0
38	485	484	541	551	liv	1.0
38	363	893	457	957	liv	1.0
38	496	596	555	664	liv	1.0
38	478	900	542	988	liv	1.0
38	359	984	459	1037	liv	1.0
38	463	175	514	240	liv	1.0
38	363	256	449	311	liv	0.99999976
38	366	951	448	985	liv	0.99999976
38	997	319	1050	380	liv	0.99999976
38	489	198	548	264	liv	0.9999995
38	517	537	568	584	liv	0.9999994
38	418	622	474	694	liv	0.9999994
38	321	910	358	949	round	0.9999993
38	548	301	627	367	liv	0.9999981
38	873	212	921	251	round	0.9999975
38	174	563	205	593	round	0.9999974
38	1355	758	1386	831	liv	0.9999964
38	314	94	361	133	round	0.9999958
38	366	300	403	338	round	0.99999344
38	515	862	556	902	round	0.9999925
38	1325	275	1380	357	liv	0.9999893
38	1301	304	1331	341	round	0.99998903
38	409	703	459	753	liv	0.99998
38	1344	556	1384	600	round	0.9999671
38	468	963	499	996	round	0.9999578
38	362	224	442	266	liv	0.99993086
38	514	999	548	1032	round	0.9999281
38	799	543	841	575	round	0.99991524
38	1306	672	1348	710	round	0.9999118
38	428	214	468	256	round	0.99984896
38	570	507	603	541	round	0.9997867
38	523	308	595	353	liv	0.9997813
38	459	993	497	1032	liv	0.99976
38	420	51	462	107	liv	0.9997328
38	799	498	858	546	liv	0.99970585
38	461	988	496	1035	liv	0.9995547
38	1367	717	1388	757	liv	0.9991541
38	436	515	470	547	round	0.9983228
38	970	267	1021	305	round	0.9974718
38	453	527	486	561	round	0.99490345
38	573	447	608	481	round	0.8365948
38	608	1	680	21	liv	0.809999
38	1326	680	1364	724	liv	0.7623809
38	1305	674	1359	714	round	0.7563303
38	1328	676	1358	719	round	0.62828463
39	438	261	541	354	liv	1.0
39	485	481	542	551	liv	1.0
39	488	589	561	661	liv	1.0
39	892	70	952	138	liv	1.0
39	367	222	431	263	liv	1.0
39	365	952	448	985	liv	1.0
39	489	197	543	261	liv	0.9999999
39	464	177	512	238	liv	0.9999999
39	366	898	459	961	liv	0.9999999
39	475	904	542	989	liv	0.99999976
39	355	984	454	1034	liv	0.9999994
39	546	304	624	369	liv	0.99999905
39	322	913	357	948	round	0.99999905
39	467	963	502	997	round	0.99999857
39	1301	304	1332	340	round	0.99999785
39	873	211	920	252	round	0.99999666
39	514	536	567	585	liv	0.999995
39	1344	556	1386	596	round	0.9999943
39	516	864	555	900	round	0.99999416
39	174	561	203	588	round	0.99999285
39	419	620	471	695	liv	0.9999926
39	425	213	468	253	round	0.99999166
39	1353	758	1386	832	liv	0.99998975
39	999	320	1043	379	liv	0.99998474
39	314	95	360	132	round	0.9999846
39	513	1000	547	1032	round	0.9999844
39	368	298	403	336	round	0.99997985
39	374	253	444	311	liv	0.9999783
39	1322	273	1382	355	liv	0.9999777
39	568	509	602	544	round	0.99992836
39	526	311	593	353	liv	0.99992585
39	435	512	470	546	round	0.99985564
39	800	542	840	575	round	0.99984014
39	801	497	856	545	liv	0.9995491
39	1301	674	1343	711	round	0.9988267
39	464	990	496	1035	liv	0.99794775
39	574	440	608	482	dead	0.9975815
39	448	529	483	565	round	0.99734855
39	409	708	456	755	round	0.99708194
39	461	994	497	1030	liv	0.99470454
39	1366	713	1388	761	liv	0.9946173
39	1314	684	1363	724	liv	0.93581843
39	1323	684	1361	723	liv	0.8617155
39	965	266	1029	304	liv	0.7027517
39	1325	679	1357	722	liv	0.6669944
39	418	54	461	106	round	0.64102954
39	968	267	1027	305	round	0.57954735
39	617	1	684	21	liv	0.574561
40	438	263	541	357	liv	1.0
40	481	913	543	990	liv	1.0
40	487	481	544	548	liv	1.0
40	893	63	954	141	liv	1.0
40	364	946	451	986	liv	1.0
40	493	596	556	662	liv	1.0
40	365	895	459	962	liv	0.9999999
40	359	221	436	261	liv	0.9999999
40	463	174	511	239	liv	0.9999999
40	368	250	449	303	liv	0.9999999
40	491	196	547	265	liv	0.99999976
40	350	983	453	1034	liv	0.9999994
40	547	304	627	368	liv	0.9999989
40	998	321	1045	379	liv	0.9999989
40	320	910	357	950	round	0.9999988
40	417	626	472	693	liv	0.9999976
40	1354	760	1386	831	liv	0.999997
40	1301	305	1331	340	round	0.999997
40	175	563	206	592	round	0.9999968
40	873	208	919	250	round	0.9999963
40	517	864	556	901	round	0.99999475
40	314	93	360	134	round	0.9999945
40	1344	554	1384	595	round	0.9999939
40	426	214	466	254	round	0.99999297
40	515	535	567	583	liv	0.9999924
40	513	1000	546	1033	round	0.9999893
40	367	298	404	338	round	0.9999858
40	965	266	1031	307	liv	0.99998176
40	1322	273	1381	357	liv	0.99998033
40	467	965	498	998	round	0.99996066
40	799	500	855	545	liv	0.9999267
40	436	511	472	546	round	0.9999255
40	799	541	839	575	round	0.9999032
40	435	507	473	548	round	0.9998134
40	444	531	483	568	round	0.9998036
40	462	989	497	1035	liv	0.9995834
40	525	311	591	352	liv	0.99825996
40	460	993	498	1031	liv	0.99685776
40	1366	717	1388	756	round	0.995802
40	565	503	601	543	round	0.96914613
40	1306	668	1357	722	round	0.9614428
40	621	1	680	20	round	0.9531597
40	408	710	456	752	round	0.93394864
40	619	0	674	23	round	0.90651494
40	418	54	462	107	round	0.87318826
40	656	0	694	18	liv	0.7145781
40	569	429	614	478	round	0.6050404
41	442	264	540	349	liv	1.0
41	894	62	954	140	liv	1.0
41	368	949	448	988	liv	1.0
41	463	175	512	240	liv	1.0
41	487	478	543	551	liv	1.0
41	367	216	430	260	liv	1.0
41	365	897	461	960	liv	0.9999999
41	528	302	637	370	liv	0.9999999
41	470	904	540	989	liv	0.9999999
41	409	703	460	752	liv	0.99999976
41	489	198	545	264	liv	0.99999976
41	497	592	558	664	liv	0.99999976
41	321	910	359	947	round	0.9999993
41	367	989	449	1033	liv	0.99999905
41	368	252	434	306	liv	0.9999988
41	997	323	1050	381	liv	0.99999845
41	178	561	206	591	round	0.9999982
41	875	211	918	252	round	0.9999974
41	420	626	471	695	liv	0.99999714
41	515	534	567	584	liv	0.99999654
41	424	214	466	253	round	0.99999595
41	1351	759	1387	833	liv	0.9999937
41	469	964	501	1000	round	0.99999344
41	520	863	556	899	round	0.999992
41	311	95	360	132	round	0.99999094
41	1300	304	1334	341	round	0.9999852
41	365	300	402	337	round	0.9999821
41	569	507	603	543	round	0.99993634
41	442	530	479	570	round	0.9999342
41	1324	273	1382	357	liv	0.9999201
41	799	543	839	576	round	0.99991524
41	435	508	473	551	round	0.99983096
41	798	499	856	546	liv	0.99953854
41	1310	666	1350	705	round	0.9982079
41	573	436	605	477	dead	0.99576
41	1348	552	1386	596	round	0.9955627
41	623	0	685	21	round	0.98953027
41	1367	716	1387	756	round	0.97543234
41	417	58	461	108	round	0.96403927
41	1365	717	1388	758	round	0.9550385
41	465	996	490	1038	liv	0.95320845
41	968	267	1028	304	liv	0.91445553
41	1321	689	1361	725	round	0.69799757
42	440	260	545	352	liv	1.0
42	493	594	559	658	liv	1.0
42	371	217	438	263	liv	1.0
42	374	248	429	305	liv	1.0
42	889	66	954	137	liv	1.0
42	484	475	546	555	liv	1.0
42	368	988	452	1036	liv	0.9999999
42	472	897	539	988	liv	0.9999999
42	367	896	459	961	liv	0.9999999
42	459	175	513	241	liv	0.99999976
42	491	197	545	264	liv	0.99999964
42	528	317	590	360	liv	0.99999964
42	371	950	449	985	liv	0.9999995
42	319	906	357	949	round	0.9999995
42	397	709	457	752	liv	0.9999993
42	876	212	918	252	round	0.9999989
42	422	631	472	691	liv	0.99999857
42	313	94	361	136	round	0.9999975
42	1301	306	1332	342	round	0.9999974
42	176	563	205	592	round	0.99999654
42	967	267	1033	308	liv	0.99999464
42	565	301	637	370	liv	0.99999344
42	516	534	569	583	liv	0.99999094
42	470	963	502	998	round	0.9999896
42	1347	552	1386	592	round	0.9999889
42	803	497	853	545	liv	0.99998367
42	519	865	558	905	round	0.9999808
42	997	323	1047	379	liv	0.9999784
42	1325	273	1381	356	liv	0.9999776
42	368	299	402	338	round	0.9999764
42	513	1000	548	1032	round	0.9999467
42	424	215	467	258	round	0.99993277
42	572	439	610	478	round	0.99988794
42	1307	664	1353	700	round	0.9998534
42	1348	763	1387	836	liv	0.9998448
42	569	505	602	540	round	0.99984264
42	799	541	840	575	round	0.9998374
42	1367	718	1388	757	round	0.99904376
42	375	257	426	305	liv	0.9988142
42	467	1002	491	1034	liv	0.9978237
42	439	510	478	561	round	0.9977314
42	468	997	492	1040	liv	0.99497294
42	418	58	462	109	round	0.9933896
42	1365	721	1388	760	round	0.9933657
42	444	527	477	569	round	0.97145826
42	621	0	677	23	round	0.93963724
42	1313	691	1368	725	liv	0.9315202
42	466	997	492	1034	liv	0.77032197
43	434	263	544	354	liv	1.0
[truncated: 63,842 more rows]
