# Supplementary material for: CeCILE - An Artificial Intelligence Based Cell-Detection for the Evaluation of Radiation Effects in Eucaryotic Cells
Source: Front Oncol. 2021 Jun 30;11:688333. doi: 10.3389/fonc.2021.688333 (PMC8278143; doi:10.3389/fonc.2021.688333)
Supplement: Supplementary file 3 [file Table_6.xlsx]

## Sheet: sham
FrameID	Start X	Start Y	End X	End Y	Classlabel	Confidence
0	652	551	764	617	liv	1.0
0	1177	76	1249	135	liv	1.0
0	1104	721	1153	780	liv	1.0
0	214	663	282	726	liv	1.0
0	1166	240	1209	285	liv	1.0
0	850	171	927	229	liv	1.0
0	861	869	910	949	liv	1.0
0	264	667	315	720	liv	0.9999999
0	926	736	990	792	liv	0.9999999
0	824	810	895	851	liv	0.9999999
0	375	134	445	209	liv	0.9999999
0	1150	101	1192	153	liv	0.9999999
0	1089	685	1153	739	liv	0.9999999
0	886	151	942	204	liv	0.99999976
0	872	828	940	878	liv	0.99999976
0	159	545	216	598	liv	0.99999964
0	159	651	218	699	liv	0.9999995
0	100	555	169	604	liv	0.9999995
0	44	573	95	632	liv	0.9999994
0	262	513	320	571	liv	0.9999994
0	202	218	263	280	liv	0.9999993
0	1162	673	1215	720	liv	0.9999993
0	836	847	871	907	liv	0.9999989
0	225	307	267	350	round	0.9999989
0	247	557	294	601	liv	0.99999833
0	801	379	837	413	round	0.9999982
0	160	752	207	798	liv	0.99999785
0	704	878	768	927	liv	0.99999774
0	80	736	139	787	liv	0.99999726
0	110	753	148	799	liv	0.9999962
0	256	331	293	373	round	0.99999607
0	408	554	512	599	liv	0.99999535
0	251	724	306	763	liv	0.9999951
0	831	279	863	321	round	0.99999404
0	211	377	251	414	round	0.9999919
0	580	574	614	605	round	0.9999901
0	804	439	835	471	round	0.99998784
0	1160	717	1194	744	round	0.99998593
0	544	537	586	581	round	0.9999856
0	810	254	860	307	round	0.99998474
0	766	568	810	606	round	0.9999845
0	1156	779	1190	813	round	0.9999763
0	566	480	597	513	round	0.9999747
0	186	522	230	561	liv	0.99997115
0	1127	117	1157	157	liv	0.9999641
0	150	722	185	759	dead	0.99995184
0	45	519	82	558	round	0.99994874
0	564	508	608	545	round	0.9999294
0	570	432	615	471	round	0.9998165
0	880	0	925	27	liv	0.9998078
0	1154	215	1205	245	liv	0.9997999
0	1163	184	1198	219	liv	0.9995776
0	327	517	364	548	round	0.999458
0	1000	1026	1042	1037	round	0.9992092
0	1097	674	1153	715	liv	0.9991873
1	220	667	277	726	liv	1.0
1	372	133	447	206	liv	1.0
1	1166	236	1209	287	liv	0.9999999
1	820	809	899	855	liv	0.9999999
1	646	554	760	614	liv	0.9999999
1	197	212	262	277	liv	0.9999999
1	1181	79	1248	132	liv	0.9999999
1	266	518	324	573	liv	0.9999999
1	1152	99	1189	149	liv	0.99999976
1	165	540	216	598	liv	0.99999976
1	875	828	951	877	liv	0.99999976
1	885	152	938	203	liv	0.99999976
1	250	723	306	766	liv	0.99999964
1	98	555	163	606	liv	0.99999964
1	861	870	911	951	liv	0.99999964
1	829	283	860	317	round	0.99999905
1	241	557	295	602	liv	0.9999988
1	216	378	252	414	round	0.9999988
1	1098	678	1156	732	liv	0.99999833
1	46	573	90	627	liv	0.9999982
1	272	668	313	716	liv	0.999998
1	815	261	859	298	round	0.999998
1	49	517	81	557	round	0.99999785
1	410	553	510	596	liv	0.9999976
1	99	744	151	797	liv	0.9999974
1	837	848	871	907	liv	0.999997
1	226	311	261	345	round	0.99999654
1	857	177	926	227	liv	0.9999963
1	187	523	230	564	liv	0.9999962
1	156	662	217	694	liv	0.99999356
1	1160	187	1199	227	liv	0.99999285
1	803	381	835	413	round	0.9999888
1	329	517	363	548	round	0.99998844
1	568	480	597	513	round	0.99998224
1	764	569	805	605	round	0.99997735
1	1155	717	1190	746	round	0.9999747
1	254	329	292	371	round	0.99997294
1	151	721	183	756	dead	0.9999715
1	566	508	602	542	round	0.9999695
1	1156	779	1188	813	round	0.9999658
1	545	542	586	581	round	0.9998971
1	583	575	612	604	round	0.999884
1	46	521	83	557	round	0.999814
1	571	433	607	470	round	0.9996911
1	942	751	979	785	round	0.9996363
1	1160	678	1209	720	round	0.99675375
1	90	739	147	792	liv	0.9962429
1	1158	211	1206	247	liv	0.99536973
1	884	0	923	23	liv	0.99444556
1	1112	730	1152	771	round	0.9940813
1	803	444	832	473	round	0.9888054
1	240	363	268	390	round	0.9618814
1	1092	691	1154	736	liv	0.94811064
1	710	884	758	923	round	0.93218017
1	162	752	206	795	liv	0.91041267
1	1126	119	1159	164	round	0.8177919
2	1181	77	1250	134	liv	1.0
2	818	807	898	853	liv	0.9999999
2	651	554	762	613	liv	0.9999999
2	214	662	284	725	liv	0.9999999
2	865	872	912	955	liv	0.9999999
2	1150	99	1189	153	liv	0.99999976
2	238	558	292	603	liv	0.99999964
2	377	133	450	206	liv	0.99999964
2	880	829	948	876	liv	0.9999995
2	202	218	267	275	liv	0.9999995
2	45	577	90	631	liv	0.9999994
2	884	149	936	201	liv	0.9999994
2	97	554	169	606	liv	0.9999993
2	254	722	307	766	liv	0.99999917
2	839	850	871	907	liv	0.99999917
2	1081	701	1144	735	liv	0.9999989
2	215	378	251	415	round	0.9999989
2	410	554	506	596	liv	0.9999987
2	164	546	215	600	liv	0.9999981
2	818	261	857	297	round	0.999997
2	831	284	862	319	round	0.9999969
2	223	306	257	341	round	0.9999962
2	802	381	836	413	round	0.9999957
2	185	525	229	563	liv	0.99999464
2	279	521	326	577	liv	0.9999931
2	1167	220	1207	283	liv	0.99999106
2	547	544	587	580	round	0.99998796
2	1159	688	1201	724	round	0.9999852
2	1103	676	1149	716	liv	0.9999815
2	94	740	144	799	liv	0.9999765
2	572	433	608	466	round	0.9999651
2	254	331	293	373	round	0.99995756
2	50	516	82	556	round	0.9999566
2	1158	778	1189	810	round	0.9999515
2	568	482	598	512	round	0.9999305
2	942	748	982	784	round	0.9999274
2	330	518	363	550	round	0.9999162
2	582	574	612	603	round	0.9998933
2	568	509	602	540	round	0.9998753
2	1160	716	1193	745	round	0.9998658
2	152	664	211	702	liv	0.9998092
2	801	446	831	474	round	0.99979347
2	762	571	809	607	round	0.9997527
2	153	716	182	758	dead	0.9997384
2	713	883	753	923	round	0.99964416
2	1168	231	1208	282	liv	0.99963033
2	46	518	85	557	round	0.9994615
2	861	180	924	228	liv	0.9993937
2	159	751	205	793	liv	0.99933225
2	1116	732	1150	771	round	0.9991872
2	104	744	146	800	liv	0.9791886
2	1164	189	1198	228	liv	0.90493244
2	885	0	923	23	round	0.8907187
2	1123	119	1157	163	round	0.8650179
2	276	672	312	711	round	0.5786738
2	276	671	314	711	liv	0.54119474
3	652	557	761	613	liv	1.0
3	1180	78	1249	134	liv	1.0
3	865	872	914	953	liv	0.9999999
3	99	553	168	606	liv	0.9999999
3	376	132	450	205	liv	0.9999999
3	218	663	287	725	liv	0.99999976
3	87	733	143	795	liv	0.99999976
3	884	150	938	202	liv	0.99999964
3	1168	226	1212	283	liv	0.9999995
3	166	545	216	597	liv	0.9999995
3	824	806	898	851	liv	0.9999995
3	201	218	263	277	liv	0.9999994
3	1152	99	1188	150	liv	0.9999993
3	407	553	502	596	liv	0.99999917
3	837	851	872	908	liv	0.99999833
3	215	379	251	416	round	0.99999833
3	878	829	945	876	liv	0.9999975
3	580	576	612	606	round	0.9999969
3	817	259	858	299	round	0.99999595
3	255	332	294	373	round	0.9999949
3	548	546	586	580	round	0.9999945
3	830	284	861	319	round	0.9999944
3	804	380	837	414	round	0.9999939
3	761	570	808	606	round	0.99999356
3	943	746	984	784	round	0.99999356
3	184	523	229	564	liv	0.999992
3	222	307	256	340	round	0.999992
3	275	673	312	714	round	0.9999912
3	1157	779	1189	812	round	0.99999046
3	860	181	926	229	liv	0.9999888
3	1104	674	1149	721	liv	0.99998844
3	1161	687	1198	721	round	0.99998367
3	254	721	303	765	liv	0.99998355
3	331	518	363	549	round	0.99997985
3	45	522	85	560	round	0.999974
3	570	433	608	467	round	0.99997354
3	712	883	753	921	round	0.9999682
3	1101	682	1151	723	liv	0.99996626
3	243	558	293	607	liv	0.99993277
3	570	510	601	538	round	0.99987435
3	1125	121	1158	162	round	0.9998456
3	1114	733	1152	772	round	0.9998275
3	562	473	599	504	round	0.9997321
3	159	661	220	698	liv	0.9996604
3	1091	699	1149	733	liv	0.99946266
3	277	521	324	572	liv	0.99937373
3	35	582	87	635	liv	0.99888533
3	1165	187	1200	224	round	0.9987741
3	161	751	202	790	liv	0.995545
3	883	0	923	25	round	0.99509627
3	1161	714	1195	744	round	0.9715497
3	805	447	834	475	dead	0.970103
3	150	717	190	766	liv	0.9113023
4	647	556	762	614	liv	1.0
4	1089	699	1144	738	liv	1.0
4	816	811	901	851	liv	1.0
4	1181	79	1246	132	liv	1.0
4	1148	101	1188	153	liv	1.0
4	1167	230	1212	289	liv	0.9999999
4	377	128	450	206	liv	0.9999999
4	221	667	285	724	liv	0.9999999
4	99	555	161	606	liv	0.9999999
4	863	870	915	949	liv	0.9999999
4	873	827	947	879	liv	0.99999976
4	169	543	215	595	liv	0.99999964
4	884	150	938	202	liv	0.9999995
4	197	218	265	275	liv	0.99999917
4	216	379	253	414	round	0.99999917
4	409	556	506	595	liv	0.99999905
4	254	725	302	766	liv	0.9999981
4	87	730	142	792	liv	0.99999785
4	765	572	811	609	round	0.99999785
4	829	285	861	318	round	0.99999774
4	817	261	858	297	round	0.9999975
4	48	524	84	560	round	0.9999968
4	550	546	586	581	round	0.9999924
4	332	519	364	551	round	0.9999914
4	277	674	308	711	round	0.9999913
4	803	381	835	413	round	0.99999034
4	711	882	755	922	round	0.99998856
4	837	851	872	907	liv	0.99998343
4	1125	116	1155	176	liv	0.99998236
4	567	434	604	471	round	0.9999815
4	1157	779	1189	812	round	0.9999808
4	187	526	229	563	liv	0.99997544
4	950	753	985	786	round	0.99997103
4	581	575	613	604	round	0.9999702
4	283	524	327	578	liv	0.999962
4	224	308	256	340	round	0.9999423
4	35	588	86	638	liv	0.9999403
4	1114	732	1151	771	round	0.9998789
4	1164	687	1195	723	round	0.99987304
4	1105	673	1147	716	liv	0.99967086
4	252	332	292	372	liv	0.99950147
4	807	447	834	476	round	0.99912816
4	567	513	600	542	round	0.9986307
4	1166	185	1196	223	round	0.9971009
4	160	752	198	787	liv	0.99192303
4	157	660	222	696	liv	0.98968923
4	863	181	926	229	liv	0.98892456
4	244	559	291	603	liv	0.98224
4	570	487	600	515	round	0.87627494
4	152	720	185	766	dead	0.7567771
4	882	0	921	24	liv	0.6331211
4	565	472	598	502	round	0.61522406
4	1165	212	1198	242	round	0.5718169
4	151	718	189	766	liv	0.552279
5	651	555	761	614	liv	1.0
5	376	128	450	204	liv	1.0
5	863	872	914	951	liv	1.0
5	818	812	901	855	liv	1.0
5	1092	700	1144	740	liv	1.0
5	877	821	950	879	liv	1.0
5	1179	80	1248	131	liv	1.0
5	221	667	283	726	liv	0.9999999
5	97	556	164	606	liv	0.9999999
5	200	217	261	274	liv	0.99999976
5	1148	102	1189	152	liv	0.99999976
5	37	571	82	635	liv	0.99999976
5	1169	223	1211	282	liv	0.99999917
5	169	544	215	592	liv	0.99999905
5	411	555	507	595	liv	0.99999905
5	85	735	137	793	liv	0.9999987
5	886	151	935	200	liv	0.9999987
5	256	725	303	764	liv	0.9999975
5	836	853	872	910	liv	0.9999975
5	714	882	753	919	round	0.9999975
5	549	546	584	581	round	0.99999607
5	217	379	253	413	round	0.9999956
5	830	283	861	317	round	0.9999949
5	568	512	598	539	round	0.9999949
5	804	381	838	415	round	0.9999906
5	817	260	859	300	round	0.9999893
5	564	433	602	471	round	0.9999887
5	1157	778	1189	811	round	0.99998724
5	1124	116	1157	171	liv	0.9999857
5	948	754	984	787	round	0.99998426
5	50	525	86	560	round	0.9999827
5	222	308	255	341	round	0.99998105
5	187	525	230	563	liv	0.9999788
5	582	575	612	605	round	0.9999784
5	1114	733	1151	770	round	0.99995065
5	1107	676	1148	718	liv	0.9999491
5	332	519	362	551	round	0.99994516
5	1161	689	1195	722	round	0.9999423
5	762	570	809	605	round	0.99986506
5	1165	187	1196	222	round	0.9998528
5	275	671	312	714	round	0.9994299
5	286	530	325	573	round	0.9978399
5	165	661	223	699	liv	0.9964168
5	248	330	293	377	liv	0.99601245
5	564	473	598	505	round	0.9959965
5	863	181	926	227	liv	0.994759
5	1161	713	1195	748	round	0.9943891
5	883	0	921	22	round	0.9827859
5	248	563	290	606	round	0.9678478
5	570	493	598	517	round	0.9487776
5	805	446	833	473	round	0.9461873
5	153	715	183	753	round	0.8834281
5	160	741	191	776	liv	0.7848021
5	152	718	181	751	round	0.69468963
6	878	819	951	882	liv	1.0
6	818	811	903	852	liv	1.0
6	1181	78	1247	133	liv	1.0
6	1151	98	1188	150	liv	1.0
6	863	870	912	952	liv	0.9999999
6	651	556	763	613	liv	0.9999999
6	375	127	449	208	liv	0.9999999
6	201	215	264	275	liv	0.9999999
6	100	555	158	604	liv	0.9999999
6	1120	120	1157	180	liv	0.9999995
6	570	511	599	541	round	0.99999917
6	1090	702	1144	739	liv	0.9999989
6	226	675	284	725	liv	0.9999987
6	410	556	507	595	liv	0.9999987
6	830	285	861	318	round	0.9999987
6	256	725	306	764	liv	0.99999833
6	217	379	252	415	round	0.9999982
6	818	260	859	298	round	0.9999975
6	157	659	222	701	liv	0.9999974
6	583	575	612	605	round	0.9999963
6	548	547	585	582	round	0.99999547
6	82	735	136	786	liv	0.99999523
6	805	381	838	414	round	0.99999464
6	52	527	88	559	round	0.99999416
6	566	435	603	472	round	0.9999933
6	223	309	255	341	round	0.99999285
6	713	884	753	921	round	0.9999924
6	248	563	294	611	liv	0.99998975
6	946	754	982	786	round	0.99998784
6	839	851	874	909	liv	0.999984
6	1169	222	1211	282	liv	0.99997365
6	884	150	933	198	liv	0.9999728
6	33	578	80	632	liv	0.999964
6	1157	779	1190	811	round	0.9999634
6	1163	688	1195	721	round	0.999961
6	1165	186	1196	222	round	0.99995124
6	332	519	363	552	round	0.9999435
6	276	666	312	712	round	0.99987566
6	189	527	230	563	liv	0.999723
6	881	0	925	25	round	0.9990362
6	860	182	924	228	liv	0.9989178
6	287	528	327	575	round	0.9987955
6	170	543	213	594	liv	0.998689
6	1113	731	1150	771	round	0.9972247
6	1106	674	1149	715	liv	0.9958901
6	761	568	809	605	round	0.99579704
6	150	724	180	766	dead	0.94813454
6	806	448	833	475	dead	0.905906
6	568	494	598	518	round	0.8964865
6	1160	714	1193	747	round	0.8748025
6	251	333	294	373	liv	0.68627805
6	251	334	294	375	round	0.58050555
6	148	729	182	767	round	0.5705734
7	378	123	453	209	liv	1.0
7	30	574	82	644	liv	1.0
7	872	819	945	880	liv	1.0
7	1181	78	1246	133	liv	1.0
7	99	557	158	605	liv	1.0
7	861	869	912	951	liv	0.9999999
7	824	808	901	851	liv	0.9999999
7	198	211	259	273	liv	0.9999999
7	648	553	760	615	liv	0.9999999
7	1150	99	1190	147	liv	0.9999999
7	1167	221	1212	279	liv	0.99999976
7	255	723	304	762	liv	0.99999905
7	185	526	231	564	liv	0.9999987
7	571	434	605	471	round	0.9999987
7	217	379	253	415	round	0.99999857
7	838	853	873	916	liv	0.99999845
7	227	675	283	727	liv	0.9999982
7	819	260	859	297	round	0.9999982
7	1104	675	1152	719	liv	0.9999981
7	829	284	861	318	round	0.9999981
7	407	556	505	595	liv	0.9999968
7	714	885	752	919	round	0.99999595
7	1116	123	1158	171	liv	0.99999464
7	548	546	583	582	round	0.99999464
7	804	381	836	414	round	0.9999944
7	48	526	87	563	round	0.9999937
7	173	545	214	590	liv	0.99999297
7	569	511	598	539	round	0.9999907
7	1089	701	1146	739	liv	0.9999875
7	219	308	254	343	round	0.99998677
7	579	576	612	611	round	0.9999796
7	330	520	361	551	round	0.99997914
7	1157	778	1190	811	round	0.9999788
7	253	334	292	370	round	0.99996996
7	171	659	219	696	liv	0.999966
7	762	567	808	605	round	0.99991965
7	277	669	313	713	round	0.9999099
7	1162	188	1194	223	round	0.9998667
7	1162	689	1196	723	round	0.9998467
7	1114	730	1150	770	round	0.99984264
7	81	742	131	790	liv	0.99958056
7	806	446	835	474	round	0.9988568
7	287	531	326	576	round	0.9988398
7	882	0	924	25	round	0.99871135
7	247	562	293	609	liv	0.99509877
7	944	757	978	787	round	0.9891215
7	882	149	931	196	liv	0.91777253
7	862	184	923	225	round	0.8898335
7	563	485	601	517	liv	0.87320983
7	144	726	179	765	round	0.8652759
8	652	556	763	614	liv	1.0
8	1146	101	1189	149	liv	1.0
8	373	125	450	205	liv	1.0
8	1182	80	1247	132	liv	1.0
8	1092	701	1143	742	liv	1.0
8	865	868	913	952	liv	0.9999999
8	201	214	262	275	liv	0.9999999
8	875	818	949	881	liv	0.9999999
8	100	559	155	603	liv	0.9999999
8	821	808	900	852	liv	0.99999976
8	838	853	875	910	liv	0.99999964
8	27	577	82	642	liv	0.99999917
8	1170	220	1217	278	liv	0.9999987
8	219	381	252	415	round	0.9999982
8	767	569	809	606	round	0.9999981
8	569	512	598	539	round	0.9999981
8	1106	677	1149	716	liv	0.999998
8	1115	121	1156	170	liv	0.999998
8	819	260	860	298	round	0.99999774
8	410	555	504	595	liv	0.9999975
8	570	436	604	473	round	0.9999974
8	829	283	861	318	round	0.999997
8	547	547	583	580	round	0.99999654
8	714	885	752	921	round	0.9999963
8	802	381	836	414	round	0.9999957
8	51	528	90	561	round	0.99999154
8	277	670	314	713	round	0.9999896
8	218	308	254	342	round	0.99998844
8	1115	735	1151	770	round	0.9999863
8	1157	777	1189	811	round	0.99997985
8	185	527	228	563	liv	0.999977
8	332	519	363	553	round	0.9999747
8	227	673	283	726	liv	0.9999672
8	583	576	612	606	round	0.99996483
8	256	726	303	762	liv	0.99996114
8	288	530	325	576	round	0.99994516
8	885	151	933	199	liv	0.9999318
8	251	333	293	374	round	0.99990404
8	249	565	293	606	round	0.9998634
8	1162	189	1195	224	round	0.999858
8	806	443	835	473	round	0.9997774
8	1161	709	1193	747	round	0.9997675
8	1161	688	1195	719	round	0.9994649
8	170	661	222	698	liv	0.99901843
8	943	755	978	788	round	0.9985758
8	883	0	923	24	round	0.99583614
8	80	743	123	788	round	0.9771516
8	567	490	600	516	round	0.86315775
8	142	726	180	766	div	0.75866836
8	1161	716	1191	744	round	0.72312367
8	570	496	598	519	round	0.7195165
8	864	184	921	226	round	0.68777317
9	370	122	451	206	liv	1.0
9	28	572	84	643	liv	1.0
9	824	812	902	859	liv	1.0
9	1183	80	1245	132	liv	1.0
9	653	557	763	615	liv	1.0
9	1089	700	1145	742	liv	0.9999999
9	201	217	265	275	liv	0.9999999
9	866	870	912	949	liv	0.9999999
9	1114	120	1160	171	liv	0.99999976
9	99	557	157	602	liv	0.99999976
9	1146	102	1189	152	liv	0.99999964
9	876	818	951	881	liv	0.9999994
9	217	382	252	416	round	0.9999989
9	830	285	861	318	round	0.9999982
9	800	381	834	414	round	0.9999981
9	549	548	584	582	round	0.9999981
9	409	556	506	596	liv	0.99999785
9	217	308	253	342	round	0.9999976
9	818	262	859	299	round	0.9999974
9	229	675	283	725	liv	0.9999968
9	582	577	613	607	round	0.9999933
9	1106	677	1152	719	liv	0.9999932
9	715	886	754	921	round	0.99999297
9	881	151	934	199	liv	0.9999924
9	46	525	88	560	round	0.9999914
9	570	435	605	473	round	0.9999914
9	254	334	294	372	round	0.99999106
9	1156	779	1187	811	round	0.99998176
9	762	569	809	605	round	0.99997973
9	943	753	978	785	round	0.9999764
9	1165	688	1196	721	round	0.9999496
9	333	520	363	553	round	0.99994195
9	1162	189	1194	225	round	0.9999336
9	568	511	598	542	round	0.99991524
9	287	531	331	579	liv	0.99989307
9	861	180	923	227	liv	0.99988234
9	191	527	231	566	liv	0.99984765
9	1160	716	1190	744	round	0.9998323
9	80	745	125	790	round	0.9997105
9	1112	731	1148	771	round	0.9995981
9	145	729	180	764	round	0.9980242
9	258	727	303	762	liv	0.99679595
9	805	444	835	474	round	0.9958131
9	838	850	874	909	liv	0.99516475
9	173	661	222	696	round	0.98664165
9	556	479	590	507	round	0.9669681
9	883	0	923	22	round	0.96494794
9	555	475	591	509	round	0.9434126
9	1175	226	1213	277	liv	0.93669075
9	249	566	290	607	round	0.89884466
9	278	666	313	714	round	0.8729006
10	371	124	454	206	liv	1.0
10	1091	700	1143	744	liv	1.0
10	823	810	901	854	liv	1.0
10	1147	100	1189	151	liv	1.0
10	649	555	763	615	liv	1.0
10	1182	79	1245	134	liv	1.0
10	879	818	950	882	liv	1.0
10	1115	117	1159	184	liv	1.0
10	100	557	154	604	liv	0.9999999
10	860	868	911	952	liv	0.9999999
10	201	217	264	279	liv	0.9999999
10	24	575	81	642	liv	0.9999999
10	1177	231	1216	285	liv	0.99999964
10	216	382	251	415	round	0.9999994
10	408	556	506	594	liv	0.99999917
10	168	539	216	592	liv	0.9999989
10	218	308	255	346	round	0.99999857
10	830	285	860	318	round	0.99999845
10	818	262	859	298	round	0.9999982
10	568	511	598	541	round	0.9999976
10	581	577	613	608	round	0.99999714
10	1105	677	1151	717	liv	0.9999969
10	192	526	234	564	liv	0.9999968
10	48	527	89	562	round	0.9999964
10	1155	782	1186	813	round	0.9999951
10	941	751	978	785	round	0.999995
10	715	889	750	922	round	0.9999943
10	569	436	604	472	round	0.99999213
10	230	677	284	725	liv	0.9999871
10	254	335	293	373	round	0.9999825
10	803	381	836	414	round	0.9999814
10	333	520	364	553	round	0.99997556
10	1116	737	1150	774	round	0.9999745
10	548	548	582	582	round	0.9999627
10	1165	690	1197	723	round	0.99995303
10	765	569	814	607	round	0.99992085
10	840	854	874	908	liv	0.9999037
10	143	726	180	764	round	0.99989355
10	884	153	934	200	liv	0.9998683
10	257	729	304	763	liv	0.99979156
10	287	531	334	580	liv	0.9997793
10	1161	189	1192	227	round	0.99942267
10	806	448	834	477	round	0.9989442
10	883	0	925	26	round	0.9986639
10	550	486	586	511	round	0.9975453
10	251	568	292	609	round	0.99633324
10	1160	715	1189	744	round	0.98965657
10	176	660	225	701	liv	0.9776384
10	82	748	126	792	round	0.9760833
10	277	667	314	715	liv	0.9096532
10	861	184	921	226	round	0.88147074
10	549	483	582	512	round	0.8446869
10	556	477	609	521	liv	0.6459956
11	653	556	762	615	liv	1.0
11	377	125	451	206	liv	1.0
11	1147	99	1188	156	liv	1.0
11	32	570	77	641	liv	0.9999999
11	201	216	262	276	liv	0.9999999
11	822	810	901	850	liv	0.9999999
11	862	867	913	950	liv	0.9999999
11	569	510	597	539	round	0.9999999
11	878	825	942	883	liv	0.99999976
11	1088	700	1144	745	liv	0.99999976
11	1185	79	1241	128	liv	0.99999976
11	1117	121	1156	176	liv	0.99999976
11	100	558	154	604	liv	0.99999976
11	169	538	217	594	liv	0.9999995
11	229	678	284	725	liv	0.9999994
11	217	381	251	415	round	0.9999993
11	47	526	87	562	round	0.9999988
11	194	526	238	564	liv	0.99999857
11	217	309	254	344	round	0.9999981
11	1106	677	1150	716	liv	0.9999968
11	829	285	860	318	round	0.99999654
11	838	853	874	912	liv	0.9999964
11	549	547	584	583	round	0.99999523
11	817	260	860	299	round	0.999995
11	410	556	505	596	liv	0.9999949
11	766	570	810	606	round	0.99999166
11	254	334	294	373	round	0.99999154
11	802	382	837	414	round	0.9999883
11	713	889	747	922	round	0.9999883
11	570	435	603	472	round	0.9999869
11	1165	687	1200	723	round	0.9999846
11	331	520	362	551	round	0.9999832
11	1155	779	1188	812	round	0.9999765
11	863	183	921	226	round	0.9999713
11	582	576	613	607	round	0.99996614
11	1115	736	1148	773	round	0.9999633
11	256	727	304	764	liv	0.99994135
11	253	568	291	613	round	0.99993813
11	1161	710	1189	745	round	0.9999032
11	941	752	978	786	round	0.9998646
11	883	152	934	200	liv	0.9998392
11	87	750	123	789	round	0.9997662
11	558	472	610	516	liv	0.99940836
11	806	443	835	473	round	0.99845827
11	1179	237	1214	280	round	0.9974138
11	174	660	224	703	liv	0.9965521
11	288	536	335	583	liv	0.99532604
11	882	0	922	25	round	0.986574
11	556	495	589	522	round	0.9856706
11	142	728	178	758	round	0.9121563
11	558	489	603	520	round	0.82109094
11	1159	194	1193	248	liv	0.7857944
11	276	667	313	716	liv	0.71417457
11	1162	190	1192	234	round	0.6512975
12	651	556	762	615	liv	1.0
12	374	124	453	204	liv	1.0
12	824	810	900	855	liv	1.0
12	1091	704	1143	745	liv	1.0
12	1115	118	1158	183	liv	0.9999999
12	1150	100	1188	150	liv	0.9999999
12	1184	82	1241	131	liv	0.9999999
12	200	218	264	276	liv	0.9999999
12	164	539	217	593	liv	0.9999999
12	192	525	244	563	liv	0.99999964
12	101	556	153	605	liv	0.9999993
12	34	570	83	640	liv	0.99999917
12	216	382	251	416	round	0.99999905
12	941	749	980	785	round	0.9999989
12	840	853	874	909	liv	0.9999988
12	231	677	281	725	liv	0.9999988
12	410	555	505	596	liv	0.99999857
12	215	311	252	347	round	0.9999982
12	46	527	86	563	round	0.9999982
12	583	575	612	605	round	0.99999654
12	331	518	361	550	round	0.9999958
12	828	286	860	317	round	0.99999356
12	714	889	749	922	round	0.9999931
12	818	262	859	298	round	0.99999297
12	803	382	836	416	round	0.9999908
12	549	547	583	582	round	0.99999
12	1156	782	1187	813	round	0.99998724
12	1179	235	1215	280	round	0.99998283
12	256	728	304	763	liv	0.99997854
12	762	568	807	605	round	0.99997103
12	568	436	603	473	round	0.999964
12	866	185	921	224	round	0.99995744
12	252	333	293	373	round	0.9999026
12	1116	736	1148	773	round	0.9998336
12	1162	191	1192	229	round	0.9998234
12	1159	714	1189	744	round	0.9997892
12	1164	689	1199	722	round	0.9996543
12	570	512	597	540	round	0.9995623
12	866	839	921	960	liv	0.9994937
12	878	823	949	889	liv	0.9994295
12	866	827	927	943	liv	0.99922943
12	886	152	932	200	liv	0.99921083
12	143	728	179	763	round	0.9976566
12	1108	680	1148	718	liv	0.99602413
12	882	0	923	26	round	0.9960115
12	552	483	597	516	liv	0.9956713
12	287	534	334	579	liv	0.9888657
12	809	448	836	476	round	0.98183733
12	172	662	226	705	liv	0.9540993
12	88	750	125	792	round	0.945418
12	868	849	917	957	liv	0.9201536
12	276	663	313	714	liv	0.8733371
12	249	568	291	614	round	0.8535965
12	1164	216	1196	251	round	0.8443341
12	866	825	938	927	liv	0.5510276
13	649	555	761	615	liv	1.0
13	374	126	452	206	liv	1.0
13	824	809	902	852	liv	1.0
13	871	817	947	965	liv	1.0
13	1092	704	1143	743	liv	1.0
13	839	854	879	922	liv	0.9999999
13	1184	79	1241	129	liv	0.9999999
13	1148	100	1188	154	liv	0.99999976
13	1117	116	1159	182	liv	0.99999976
13	101	558	154	605	liv	0.99999976
13	202	218	266	276	liv	0.99999964
13	883	153	936	202	liv	0.9999995
13	169	539	216	593	liv	0.9999994
13	192	523	243	564	liv	0.9999993
13	409	554	504	596	liv	0.9999988
13	215	381	251	416	round	0.99999833
13	212	310	249	345	round	0.99999833
13	944	753	984	787	round	0.99999833
13	549	549	584	584	round	0.99999726
13	232	679	283	725	liv	0.999997
13	581	576	612	607	round	0.99999666
13	256	730	307	762	liv	0.9999945
13	818	261	860	298	round	0.9999926
13	169	663	226	708	liv	0.99999225
13	765	570	813	606	round	0.999992
13	333	519	363	552	round	0.9999918
13	46	532	85	568	round	0.99998796
13	33	571	86	645	liv	0.99998736
13	1179	238	1215	282	round	0.99998426
13	827	285	860	318	round	0.99998355
13	573	436	604	472	round	0.9999813
13	1157	782	1188	812	round	0.9999707
13	802	382	837	417	round	0.99996877
13	246	567	288	607	round	0.9999665
13	547	485	603	517	liv	0.999962
13	550	481	606	518	liv	0.99995947
13	715	892	749	922	round	0.9999486
13	251	334	294	374	round	0.99992454
13	144	729	179	763	round	0.99990535
13	569	514	599	541	round	0.99988425
13	1115	733	1147	773	round	0.99986506
13	1165	688	1198	722	round	0.9995877
13	1160	716	1189	745	round	0.99933165
13	290	538	329	578	round	0.9992329
13	1110	679	1150	719	liv	0.9991273
13	884	0	923	25	round	0.9981493
13	275	664	314	715	liv	0.99670994
13	866	177	920	225	liv	0.9903914
13	1161	189	1191	239	round	0.9800448
13	0	491	22	542	liv	0.97629106
13	807	449	834	476	dead	0.96211857
13	90	755	126	792	round	0.8431999
14	647	555	762	617	liv	1.0
14	873	834	946	963	liv	1.0
14	1146	101	1186	156	liv	1.0
14	828	812	905	853	liv	1.0
14	1087	705	1143	743	liv	0.9999999
14	100	558	155	603	liv	0.9999999
14	373	127	458	202	liv	0.9999999
14	169	535	215	593	liv	0.9999999
14	841	848	882	929	liv	0.99999976
14	202	217	263	278	liv	0.99999976
14	1187	83	1242	130	liv	0.9999993
14	29	575	87	644	liv	0.9999993
14	212	312	249	347	round	0.99999905
14	217	382	251	416	round	0.9999989
14	230	680	283	725	liv	0.99999857
14	882	152	935	201	liv	0.99999833
14	944	751	980	785	round	0.99999785
14	549	549	585	584	round	0.9999976
14	768	569	810	605	round	0.9999975
14	248	569	289	607	round	0.99999726
14	818	262	860	298	round	0.9999964
14	197	524	238	564	liv	0.9999962
14	290	540	327	580	round	0.99999547
14	582	577	613	607	round	0.99999464
14	47	529	87	566	round	0.9999944
14	408	556	505	596	liv	0.99999297
14	1118	120	1158	174	liv	0.99999154
14	826	286	860	319	round	0.9999913
14	1164	688	1200	723	round	0.99998534
14	253	335	293	372	round	0.99998474
14	333	519	364	553	round	0.9999802
14	1179	235	1214	279	round	0.9999788
14	714	890	751	924	round	0.9999778
14	1156	778	1188	814	round	0.99997604
14	1114	737	1148	776	round	0.9999628
14	865	183	921	225	round	0.9999578
14	547	460	615	519	liv	0.99993205
14	143	729	178	763	round	0.99991643
14	257	731	305	763	liv	0.99991584
14	183	665	227	706	liv	0.99987507
14	1160	192	1191	230	round	0.9998565
14	801	383	837	418	round	0.9998149
14	575	437	605	474	round	0.99976164
14	567	513	597	543	round	0.9996598
14	1160	715	1189	746	round	0.999345
14	274	665	311	715	liv	0.998988
14	92	761	128	800	div	0.99731207
14	882	0	923	26	round	0.9890781
14	548	481	609	517	liv	0.98883355
14	808	446	835	475	round	0.9528809
14	1163	216	1196	249	round	0.9470288
14	551	478	614	519	liv	0.9358368
14	1108	682	1150	719	liv	0.8639114
14	1	494	23	545	liv	0.8554387
15	649	555	761	616	liv	1.0
15	876	836	946	957	liv	1.0
15	373	125	453	205	liv	1.0
15	827	813	904	854	liv	1.0
15	32	576	84	640	liv	0.99999976
15	203	216	263	278	liv	0.99999976
15	103	559	153	606	liv	0.99999964
15	1088	704	1146	745	liv	0.9999995
15	1120	128	1158	182	liv	0.9999994
15	1149	101	1187	152	liv	0.9999993
15	213	312	250	348	round	0.99999917
15	843	854	885	932	liv	0.9999989
15	217	383	250	417	round	0.9999989
15	1186	82	1241	130	liv	0.99999845
15	944	754	982	788	round	0.9999982
15	165	537	215	591	liv	0.9999981
15	550	548	586	585	round	0.99999726
15	289	539	327	580	round	0.999997
15	1179	238	1214	281	round	0.9999968
15	194	525	237	565	liv	0.9999957
15	176	663	226	703	liv	0.99999523
15	247	570	287	606	round	0.99999523
15	1156	782	1189	814	round	0.9999951
15	817	262	861	299	round	0.99999475
15	410	557	504	597	liv	0.9999939
15	869	185	923	226	round	0.9999931
15	827	286	860	320	round	0.99999297
15	714	892	747	923	round	0.9999913
15	545	459	598	499	liv	0.9999912
15	233	681	283	723	liv	0.99998736
15	1114	741	1147	774	round	0.99998486
15	50	531	89	563	round	0.9999832
15	802	383	837	418	round	0.9999765
15	882	151	932	201	liv	0.9999713
15	575	438	605	472	round	0.99996066
15	275	662	313	714	liv	0.99995196
15	569	512	599	542	round	0.99993956
15	583	577	613	608	round	0.99993503
15	1161	713	1191	747	round	0.9999131
15	334	517	364	554	round	0.999907
15	1166	690	1200	726	round	0.9999026
15	763	570	811	605	round	0.99969876
15	254	336	294	373	round	0.9996123
15	882	0	922	29	round	0.9995511
15	1160	190	1191	239	round	0.9953317
15	809	444	836	474	round	0.99352443
15	259	731	304	765	liv	0.99289095
15	139	719	165	745	dead	0.99021167
15	145	729	178	761	round	0.9809806
15	0	498	22	548	liv	0.97775525
15	544	486	607	515	liv	0.97261906
15	548	462	601	502	liv	0.9229428
15	1109	681	1149	718	liv	0.877047
15	1158	196	1191	244	round	0.6727326
15	90	762	128	799	round	0.65683997
15	90	762	127	800	div	0.65295315
16	652	556	756	615	liv	1.0
16	881	822	948	959	liv	1.0
16	825	812	900	858	liv	1.0
16	1149	101	1187	155	liv	0.9999999
16	1090	706	1143	742	liv	0.99999976
16	204	218	261	276	liv	0.99999976
16	375	124	454	207	liv	0.99999976
16	29	570	90	636	liv	0.99999964
16	839	852	889	939	liv	0.9999995
16	101	559	153	603	liv	0.9999995
16	194	524	235	566	liv	0.9999993
16	828	286	859	318	round	0.99999905
16	1116	126	1159	174	liv	0.9999989
16	1188	83	1240	128	liv	0.9999989
16	547	548	585	585	round	0.9999989
16	289	541	326	579	round	0.9999988
16	217	381	251	417	round	0.9999988
16	412	557	504	597	liv	0.9999987
16	546	452	594	495	liv	0.99999845
16	818	263	859	297	round	0.99999714
16	217	309	252	344	round	0.99999654
16	713	891	747	924	round	0.99999607
16	247	571	289	607	round	0.9999938
16	48	528	90	565	round	0.9999926
16	233	681	280	724	liv	0.99999106
16	867	185	921	226	round	0.9999907
16	1157	779	1189	814	round	0.99999
16	255	333	294	373	round	0.9999882
16	583	577	612	608	round	0.99998724
16	574	436	604	471	round	0.99998
16	1114	740	1146	775	round	0.99997985
16	1165	688	1199	723	round	0.9999771
16	802	382	837	417	round	0.99997413
16	942	754	981	787	round	0.9999695
16	169	662	228	709	liv	0.9999691
16	1162	713	1190	746	round	0.99994075
16	1181	235	1217	279	round	0.99993503
16	570	513	600	541	round	0.9998989
16	334	519	363	553	round	0.99972576
16	883	0	922	27	round	0.999645
16	888	154	933	201	liv	0.9994642
16	1110	682	1147	717	liv	0.9992348
16	257	730	306	764	liv	0.99902093
16	143	730	179	762	round	0.9986431
16	0	497	24	550	liv	0.9977494
16	1155	194	1192	246	round	0.99548423
16	553	485	609	514	liv	0.9910302
16	91	763	128	798	div	0.98919743
16	762	569	811	603	round	0.9861667
16	138	722	163	748	dead	0.9784565
16	273	662	313	713	liv	0.9686792
16	547	488	611	516	liv	0.8707395
16	807	445	835	474	round	0.78202665
17	651	556	759	614	liv	1.0
17	372	124	452	207	liv	1.0
17	824	812	903	854	liv	1.0
17	881	830	950	955	liv	1.0
17	31	568	85	633	liv	0.9999999
17	1089	709	1144	746	liv	0.99999976
17	101	558	155	602	liv	0.99999976
17	201	219	263	276	liv	0.99999976
17	178	658	225	706	liv	0.99999976
17	1149	101	1188	154	liv	0.99999964
17	544	448	600	505	liv	0.9999994
17	1184	83	1244	129	liv	0.9999994
17	842	852	888	931	liv	0.9999993
17	165	537	216	593	liv	0.9999993
17	334	518	362	552	round	0.9999989
17	548	548	584	585	round	0.9999988
17	943	754	981	787	round	0.9999987
17	232	680	281	722	liv	0.99999845
17	412	555	500	596	liv	0.99999845
17	828	286	859	318	round	0.99999833
17	254	333	294	373	round	0.9999976
17	216	383	251	417	round	0.99999714
17	714	887	749	923	round	0.9999969
17	802	381	835	416	round	0.99999654
17	215	309	251	342	round	0.9999963
17	48	527	88	562	round	0.99999595
17	1118	125	1158	175	liv	0.99999523
17	868	185	920	225	round	0.9999951
17	818	263	858	297	round	0.99999464
17	580	577	611	608	round	0.9999939
17	247	570	288	607	round	0.9999925
17	1157	780	1188	813	round	0.99999166
17	1164	688	1199	722	round	0.9999912
17	571	435	603	472	round	0.99999046
17	809	441	838	473	round	0.9999888
17	289	539	328	580	round	0.99998784
17	1113	739	1146	773	round	0.99998736
17	1180	237	1215	279	round	0.9999857
17	1160	715	1190	747	round	0.99998164
17	196	523	236	564	liv	0.9999784
17	763	568	809	603	round	0.9999279
17	886	152	933	201	liv	0.9999012
17	257	731	301	763	liv	0.9998964
17	145	731	180	763	round	0.99987924
17	569	514	598	541	round	0.9998746
17	882	0	921	26	round	0.9998739
17	1	497	31	548	liv	0.9992661
17	1160	194	1189	237	round	0.99725926
17	274	665	313	713	liv	0.9617418
17	91	762	129	796	div	0.8728841
17	556	483	603	516	liv	0.86670005
17	141	720	163	747	dead	0.8370101
17	1160	209	1195	248	round	0.7863511
17	1110	680	1150	717	round	0.71440816
18	376	124	453	202	liv	1.0
18	28	565	86	632	liv	1.0
18	826	811	901	852	liv	1.0
18	1148	101	1187	156	liv	1.0
18	882	833	951	952	liv	0.9999999
18	651	553	757	613	liv	0.99999976
18	169	653	227	707	liv	0.99999976
18	100	560	151	602	liv	0.9999994
18	199	220	262	277	liv	0.9999993
18	839	852	889	937	liv	0.9999989
18	334	518	361	551	round	0.99999833
18	945	756	982	787	round	0.99999833
18	255	334	293	373	round	0.9999982
18	715	886	750	921	round	0.9999981
18	1178	237	1214	278	round	0.9999981
18	888	152	934	204	liv	0.99999785
18	218	382	251	416	round	0.99999774
18	828	286	859	317	round	0.9999975
18	216	310	251	343	round	0.99999726
18	545	448	594	494	liv	0.9999969
18	195	523	235	564	liv	0.99999607
18	818	262	858	297	round	0.9999956
18	247	570	289	606	round	0.99999547
18	549	550	583	585	round	0.99999547
18	1189	83	1239	128	liv	0.9999949
18	412	556	504	595	liv	0.99999464
18	866	184	922	225	round	0.9999945
18	259	732	306	763	liv	0.9999939
18	763	569	811	605	round	0.9999925
18	800	382	835	416	round	0.99999213
18	290	538	327	579	round	0.9999912
18	573	437	605	473	round	0.9999851
18	1113	740	1144	774	round	0.99998355
18	571	514	599	542	round	0.9999833
18	46	528	88	565	round	0.99998295
18	809	441	837	473	round	0.99998176
18	233	680	280	721	liv	0.99998
18	582	577	612	608	round	0.9999778
18	1165	689	1199	723	round	0.9999716
18	146	730	180	765	round	0.9999701
18	1118	130	1158	176	liv	0.99995077
18	1162	714	1190	746	round	0.999918
18	1092	710	1141	746	liv	0.99987745
18	1111	680	1146	718	round	0.99985635
18	273	665	312	712	liv	0.9998141
18	1158	195	1190	233	round	0.9997341
18	0	496	29	549	liv	0.99947375
18	87	761	127	792	div	0.9991467
18	1157	779	1189	810	round	0.99614596
18	168	537	213	592	liv	0.9910019
18	881	0	923	26	round	0.99091536
18	555	487	607	517	liv	0.9128959
18	1163	218	1197	248	round	0.7962448
19	888	834	950	954	liv	1.0
19	1148	101	1186	154	liv	1.0
19	825	813	906	853	liv	1.0
19	30	566	89	636	liv	0.9999999
19	375	123	459	202	liv	0.9999999
19	202	217	260	276	liv	0.9999999
19	171	663	226	712	liv	0.9999999
19	651	558	758	614	liv	0.9999999
19	543	446	592	492	liv	0.9999995
19	257	733	306	763	liv	0.9999994
19	101	558	152	602	liv	0.99999917
19	1091	710	1141	745	liv	0.99999905
19	549	550	583	584	round	0.9999987
19	828	285	859	317	round	0.99999845
19	819	262	858	297	round	0.9999982
19	1180	234	1217	278	round	0.99999726
19	254	334	293	375	round	0.99999726
19	413	557	503	596	liv	0.999997
19	213	382	249	415	round	0.999997
19	289	540	327	578	round	0.9999964
19	195	525	234	566	liv	0.9999963
19	1188	84	1240	128	liv	0.9999962
19	946	756	982	787	round	0.99999595
19	1117	128	1157	176	liv	0.99999535
19	1112	677	1145	717	round	0.99999535
19	334	518	362	552	round	0.9999951
19	866	184	922	226	round	0.99999464
19	799	384	834	418	round	0.9999939
19	574	437	604	472	round	0.9999932
19	1161	711	1189	745	round	0.9999925
19	145	733	179	762	round	0.99999225
19	245	570	288	606	round	0.99999106
19	887	153	933	203	liv	0.99998975
19	48	526	90	562	round	0.99998856
19	1165	688	1199	722	round	0.9999883
19	843	854	889	934	liv	0.99998784
19	568	514	596	539	round	0.9999865
19	213	310	249	342	round	0.99998426
19	758	570	812	605	round	0.9999832
19	583	577	612	606	round	0.9999831
19	1157	779	1188	813	round	0.99998283
19	810	443	837	474	round	0.9999795
19	231	681	279	720	liv	0.99997497
19	1112	740	1144	772	round	0.99996495
19	712	885	756	923	round	0.99995553
19	1160	197	1190	231	round	0.99990475
19	273	665	311	712	liv	0.9998103
19	86	761	123	791	div	0.99971086
19	0	494	28	551	liv	0.99961025
19	545	490	606	516	liv	0.99849415
19	882	0	924	25	round	0.99779785
19	1166	219	1199	248	round	0.9970873
19	140	722	163	745	dead	0.99273914
19	548	491	603	518	liv	0.954119
20	373	122	455	204	liv	1.0
20	881	826	950	953	liv	1.0
20	197	198	260	279	liv	1.0
20	653	554	757	617	liv	1.0
20	27	571	88	634	liv	1.0
20	825	812	905	851	liv	1.0
20	1149	100	1185	153	liv	1.0
20	888	154	936	204	liv	0.9999999
20	175	663	227	707	liv	0.9999999
20	101	559	154	602	liv	0.99999976
20	542	446	591	492	liv	0.9999994
20	1120	124	1160	179	liv	0.9999994
20	217	313	248	344	round	0.9999994
20	844	853	888	930	liv	0.9999988
20	234	680	280	723	liv	0.99999833
20	413	556	506	597	liv	0.9999981
20	548	549	583	583	round	0.9999981
20	1092	711	1143	748	liv	0.999998
20	289	538	327	578	round	0.9999974
20	828	285	860	316	round	0.99999726
20	258	732	307	762	liv	0.99999666
20	797	384	833	417	round	0.99999607
20	820	261	859	298	round	0.99999535
20	1180	235	1217	278	round	0.99999416
20	946	755	983	788	round	0.99999404
20	1156	783	1185	813	round	0.9999939
20	193	523	234	564	liv	0.9999937
20	1110	678	1145	719	round	0.9999931
20	572	437	605	472	round	0.99999166
20	334	519	362	552	round	0.99998856
20	583	576	612	607	round	0.99998736
20	713	886	755	924	round	0.9999838
20	810	443	837	474	round	0.99997354
20	1163	714	1192	747	round	0.9999701
20	1165	690	1199	723	round	0.99996936
20	217	381	249	418	round	0.9999639
20	763	569	809	603	round	0.99996173
20	1189	84	1239	127	liv	0.9999567
20	273	666	312	712	liv	0.9999548
20	51	529	89	565	round	0.9999491
20	867	185	925	226	round	0.99984574
20	0	492	29	548	liv	0.9998355
20	238	572	290	608	liv	0.9996532
20	253	332	294	375	round	0.9995351
20	568	512	597	540	round	0.9994517
20	145	732	181	763	round	0.9993475
20	883	0	922	25	round	0.998245
20	1158	196	1191	234	round	0.9969208
20	546	489	607	519	liv	0.9949044
20	1115	736	1149	772	round	0.9901765
20	87	761	123	794	div	0.9876096
20	1165	217	1197	248	round	0.9149181
20	141	724	164	748	dead	0.87275857
20	166	538	214	595	liv	0.8485406
21	887	829	952	953	liv	1.0
21	371	124	456	200	liv	1.0
21	26	567	89	633	liv	1.0
21	177	662	226	712	liv	1.0
21	888	153	936	205	liv	1.0
21	200	206	263	277	liv	1.0
21	827	812	905	853	liv	1.0
21	1148	100	1186	156	liv	1.0
21	651	552	760	617	liv	0.9999999
21	1119	124	1158	177	liv	0.9999999
21	194	524	236	567	liv	0.99999976
21	169	535	212	590	liv	0.99999964
21	101	556	152	602	liv	0.9999994
21	550	548	582	582	round	0.99999905
21	844	853	889	932	liv	0.9999988
21	257	733	306	763	liv	0.99999833
21	1159	784	1188	814	round	0.9999976
21	1180	234	1216	278	round	0.9999974
21	217	310	252	343	round	0.99999726
21	334	518	363	552	round	0.99999666
21	828	285	860	317	round	0.99999654
21	215	381	249	418	round	0.99999595
21	1111	678	1147	717	round	0.999995
21	413	555	503	597	liv	0.99999475
21	582	577	613	607	round	0.99999356
21	797	384	833	418	round	0.9999933
21	144	731	179	762	round	0.9999931
21	546	451	594	490	liv	0.9999927
21	944	754	984	790	round	0.9999926
21	232	680	281	721	liv	0.99999094
21	716	889	751	922	round	0.99998915
21	289	538	327	578	round	0.9999881
21	1166	688	1200	722	round	0.999984
21	254	333	293	374	round	0.99998116
21	49	527	89	562	round	0.99998116
21	1164	713	1192	748	round	0.9999622
21	571	436	603	472	round	0.9999609
21	818	261	860	298	round	0.99995995
21	1093	712	1144	747	liv	0.9999598
21	0	494	29	550	liv	0.99992
21	868	184	924	226	round	0.9997801
21	1187	85	1239	125	liv	0.9997304
21	809	443	835	475	round	0.99966276
21	1115	739	1149	771	round	0.99936134
21	883	0	922	25	round	0.99911124
21	569	516	600	543	round	0.9980567
21	547	486	611	517	liv	0.99632144
21	272	668	312	712	liv	0.99383533
21	759	568	813	605	round	0.9920282
21	1161	196	1191	235	round	0.9581185
21	243	572	286	608	round	0.84242123
21	240	568	287	608	liv	0.8198703
21	86	761	123	799	div	0.7480064
21	87	762	124	798	round	0.7455267
21	546	455	599	492	liv	0.70018834
22	886	821	952	955	liv	1.0
22	200	208	264	275	liv	1.0
22	1116	126	1158	183	liv	1.0
22	164	535	212	592	liv	1.0
22	374	124	454	203	liv	1.0
22	821	811	902	859	liv	1.0
22	31	565	87	636	liv	0.9999999
22	889	154	936	205	liv	0.9999999
22	1150	100	1185	158	liv	0.9999999
22	174	662	228	704	liv	0.99999976
22	100	556	153	602	liv	0.9999995
22	547	452	593	495	liv	0.9999994
22	651	552	759	617	liv	0.9999993
22	844	852	889	937	liv	0.99999917
22	413	557	502	596	liv	0.9999988
22	216	311	249	343	round	0.9999988
22	218	383	250	417	round	0.9999988
22	550	548	585	583	round	0.99999833
22	233	679	281	723	liv	0.9999981
22	257	731	304	764	liv	0.9999974
22	1180	236	1216	279	round	0.99999726
22	335	518	363	553	round	0.99999714
22	829	285	861	318	round	0.9999957
22	945	755	981	790	round	0.9999951
22	1157	782	1187	813	round	0.999995
22	289	538	326	578	round	0.9999945
22	1110	677	1145	717	round	0.9999937
22	254	333	293	375	round	0.9999926
22	866	185	922	226	round	0.99999106
22	245	570	287	604	round	0.99999106
22	818	261	859	298	round	0.9999902
22	1091	712	1141	751	liv	0.9999881
22	718	890	753	920	round	0.99998736
22	797	384	833	419	round	0.99998724
22	1165	688	1199	721	round	0.99998534
22	573	435	604	471	round	0.99998367
22	1162	713	1191	749	round	0.99996436
22	585	577	614	609	round	0.9999629
22	760	569	818	605	liv	0.99996257
22	1117	739	1150	770	round	0.99996257
22	192	525	235	564	liv	0.99995077
22	0	495	30	550	liv	0.99994814
22	1188	85	1239	125	liv	0.99983263
22	51	530	89	562	round	0.999749
22	882	0	922	25	round	0.9996228
22	808	443	836	474	round	0.9995734
22	568	510	598	539	round	0.9978472
22	87	759	122	798	div	0.99427986
22	146	727	183	764	round	0.99165183
22	272	669	310	712	liv	0.9793554
22	1160	198	1193	241	round	0.82146513
22	546	491	604	521	liv	0.529004
23	373	124	459	202	liv	1.0
23	880	828	948	950	liv	1.0
23	201	199	264	275	liv	1.0
23	33	566	87	636	liv	1.0
23	827	809	904	853	liv	1.0
23	1149	101	1186	151	liv	1.0
23	652	551	755	620	liv	0.9999999
23	1119	126	1157	183	liv	0.9999999
23	545	454	595	501	liv	0.99999976
23	164	535	215	595	liv	0.99999976
23	890	153	938	207	liv	0.99999976
23	842	856	886	927	liv	0.99999976
23	1091	714	1139	749	liv	0.9999994
23	947	753	981	787	round	0.9999994
23	218	382	251	416	round	0.9999989
23	1179	235	1215	279	round	0.99999845
23	101	558	152	602	liv	0.9999982
23	257	730	305	763	liv	0.999998
23	716	888	752	922	round	0.9999975
23	828	285	860	317	round	0.999997
23	1159	783	1189	812	round	0.9999964
23	193	524	235	564	liv	0.9999962
23	819	263	858	297	round	0.999995
23	868	184	921	225	round	0.99999416
23	49	528	90	563	round	0.99999404
23	548	549	586	583	round	0.9999938
23	1165	688	1199	722	round	0.9999906
23	1110	677	1146	716	round	0.9999875
23	810	441	836	474	round	0.9999869
23	334	518	363	556	round	0.9999821
23	584	576	613	608	round	0.99998176
23	415	556	503	596	liv	0.9999808
23	572	434	603	471	round	0.99997807
23	1115	738	1149	769	round	0.99997795
23	799	385	835	421	round	0.9999751
23	216	312	248	342	round	0.99996126
23	290	536	326	580	round	0.9999566
23	243	571	286	605	round	0.9999566
23	234	679	278	721	liv	0.9999361
23	255	334	293	374	round	0.9998247
23	882	0	923	24	round	0.9998022
23	1164	713	1191	746	round	0.99956673
23	185	663	232	699	liv	0.9994418
23	1188	85	1240	126	liv	0.99895334
23	569	507	600	541	round	0.9949832
23	145	732	180	763	round	0.99128634
23	0	495	33	548	liv	0.98823696
23	91	759	121	799	div	0.97257036
23	1161	199	1193	240	round	0.9331556
23	270	668	311	713	liv	0.8950218
23	760	569	813	604	round	0.6730512
23	759	568	814	604	liv	0.59680617
24	881	818	947	956	liv	1.0
24	371	124	455	202	liv	1.0
24	32	567	87	632	liv	1.0
24	202	200	264	276	liv	1.0
24	653	555	759	615	liv	0.9999999
24	1152	101	1186	151	liv	0.9999999
24	832	814	906	855	liv	0.99999976
24	1122	115	1158	184	liv	0.99999976
24	1091	714	1139	750	liv	0.99999917
24	947	751	984	790	round	0.99999917
24	546	453	595	499	liv	0.9999988
24	217	381	249	416	round	0.9999987
24	842	846	889	934	liv	0.99999845
24	101	557	155	603	liv	0.99999833
24	290	540	326	578	round	0.99999833
24	216	310	249	342	round	0.9999976
24	1113	679	1145	716	round	0.99999714
24	415	555	503	595	liv	0.9999969
24	1178	236	1215	278	round	0.9999969
24	890	153	934	205	liv	0.99999666
24	243	570	288	606	round	0.9999956
24	164	533	212	589	liv	0.99999535
24	550	547	585	581	round	0.99999535
24	869	187	921	226	round	0.99999523
24	1117	736	1149	768	round	0.9999951
24	333	517	364	555	round	0.9999926
24	1159	781	1188	811	round	0.9999926
24	49	527	90	561	round	0.99999166
24	1165	688	1198	722	round	0.99999094
24	810	443	837	475	round	0.9999902
24	191	523	235	563	liv	0.99998605
24	573	436	603	470	round	0.99998236
24	585	576	613	607	round	0.99997985
24	800	383	835	416	round	0.9999739
24	818	261	860	297	round	0.99995863
24	258	732	305	763	liv	0.9999356
24	765	568	812	603	round	0.9998746
24	146	726	180	761	round	0.99984705
24	571	508	599	537	round	0.99981755
24	883	0	922	23	round	0.9997569
24	824	283	861	315	round	0.99963784
24	253	333	294	376	round	0.99949276
24	1164	708	1194	745	round	0.99920887
24	235	679	281	721	liv	0.9987332
24	1189	84	1240	127	liv	0.99845994
24	716	886	754	924	round	0.9914273
24	1	491	39	543	liv	0.9890127
24	183	662	227	701	liv	0.9556586
24	1170	193	1199	228	round	0.91735923
24	1163	204	1198	240	round	0.8479365
24	271	668	312	711	liv	0.8056799
24	274	670	311	711	round	0.7290972
24	93	758	123	800	div	0.69964886
25	654	556	757	613	liv	1.0
25	1151	99	1189	151	liv	1.0
25	832	814	906	856	liv	1.0
25	885	827	949	953	liv	1.0
25	33	568	87	633	liv	1.0
25	201	211	267	277	liv	1.0
25	1116	122	1162	180	liv	1.0
25	374	123	457	202	liv	0.9999999
25	891	152	939	207	liv	0.99999917
25	216	382	248	416	round	0.9999988
25	545	450	595	493	liv	0.9999987
25	102	556	153	603	liv	0.99999845
25	289	540	326	576	round	0.99999833
25	1179	235	1215	278	round	0.9999981
25	413	556	499	596	liv	0.999998
25	213	310	248	343	round	0.999998
25	54	527	89	563	round	0.99999774
25	827	285	861	317	round	0.9999968
25	550	547	585	581	round	0.9999968
25	1113	677	1146	716	round	0.99999595
25	716	886	754	920	round	0.9999958
25	819	263	860	297	round	0.9999958
25	842	846	890	934	liv	0.9999956
25	244	571	288	606	round	0.9999944
25	1119	739	1151	772	round	0.9999913
25	191	524	234	564	liv	0.99999
25	869	187	923	228	round	0.99998903
25	334	517	363	553	round	0.9999883
25	569	509	599	538	round	0.99998736
25	1165	689	1198	722	round	0.999987
25	1160	781	1189	811	round	0.99998546
25	573	437	604	473	round	0.99998355
25	809	442	837	475	round	0.9999832
25	178	662	228	702	liv	0.9999778
25	165	535	215	595	liv	0.99996936
25	801	383	837	416	round	0.99996495
25	1091	715	1138	756	liv	0.9999596
25	585	576	613	607	round	0.99992144
25	1164	710	1191	744	round	0.99990916
25	144	729	178	760	round	0.99988925
25	261	730	303	762	liv	0.9998253
25	254	334	293	374	round	0.9998196
25	946	754	983	791	round	0.99964976
25	0	491	30	547	liv	0.9995297
25	273	669	312	711	round	0.99924976
25	760	568	811	603	round	0.99907327
25	1188	84	1244	126	liv	0.9988192
25	93	758	122	796	div	0.9971349
25	236	677	282	720	liv	0.988755
25	1	489	34	544	liv	0.9881507
25	1169	193	1199	228	round	0.9361831
25	883	0	923	25	round	0.87454265
25	1164	204	1197	241	round	0.780991
26	883	825	948	948	liv	1.0
26	202	212	266	273	liv	1.0
26	31	570	85	633	liv	1.0
26	831	814	910	857	liv	1.0
26	375	121	458	202	liv	0.9999999
26	654	554	761	614	liv	0.9999999
26	543	449	595	495	liv	0.99999976
26	1090	715	1140	754	liv	0.99999917
26	102	558	152	603	liv	0.99999917
26	214	382	249	416	round	0.99999917
26	216	312	248	344	round	0.9999987
26	414	555	500	596	liv	0.99999785
26	1112	678	1146	717	round	0.99999785
26	289	538	326	580	round	0.99999785
26	1151	102	1186	154	liv	0.9999976
26	166	535	215	594	liv	0.99999726
26	1109	125	1165	174	liv	0.9999968
26	889	153	937	204	liv	0.9999963
26	843	849	891	932	liv	0.9999957
26	550	548	583	581	round	0.9999951
26	245	573	289	606	round	0.9999943
26	717	890	752	922	round	0.99999356
26	1159	782	1189	813	round	0.9999933
26	1183	234	1217	278	round	0.99999225
26	580	574	615	607	round	0.99999213
26	1162	689	1199	721	round	0.9999908
26	175	662	233	702	liv	0.9999901
26	871	188	922	228	round	0.9999894
26	573	438	603	471	round	0.9999883
26	1118	735	1152	770	round	0.999985
26	827	284	860	317	round	0.99998474
26	818	262	860	298	round	0.9999825
26	803	383	839	417	round	0.99998033
26	810	444	838	475	round	0.99997663
26	193	525	235	561	liv	0.9999465
26	260	730	304	764	liv	0.99993694
26	334	518	362	553	round	0.99982697
26	146	726	179	759	round	0.9997695
26	568	509	599	538	round	0.9996364
26	273	669	310	711	round	0.99962306
26	883	0	922	23	round	0.9992605
26	1164	712	1191	742	round	0.999241
26	253	333	292	375	round	0.9973047
26	1187	85	1242	124	liv	0.9957617
26	54	532	89	564	round	0.994662
26	757	569	813	604	round	0.98874635
26	87	761	125	793	div	0.9724162
26	1166	193	1197	233	round	0.96136516
26	237	681	283	722	liv	0.9559913
26	946	750	986	792	round	0.9336693
26	1161	197	1196	241	round	0.8898884
26	4	495	42	541	round	0.8209685
26	2	493	43	543	liv	0.5686803
27	374	123	458	204	liv	1.0
27	883	829	949	952	liv	1.0
27	1150	101	1188	152	liv	1.0
27	36	567	87	635	liv	1.0
27	830	814	912	859	liv	1.0
27	205	214	266	273	liv	0.9999999
27	1118	123	1161	183	liv	0.9999999
27	656	555	765	617	liv	0.9999999
27	1181	237	1216	278	round	0.99999917
27	946	755	984	792	round	0.99999905
27	892	152	938	206	liv	0.9999989
27	217	312	249	344	round	0.9999988
27	102	558	152	604	liv	0.9999987
27	245	571	286	604	round	0.9999981
27	552	547	585	580	round	0.9999976
27	415	556	503	597	liv	0.9999974
27	845	853	888	930	liv	0.99999726
27	289	539	326	577	round	0.99999726
27	819	263	860	297	round	0.99999714
27	218	384	250	417	round	0.9999969
27	716	888	751	921	round	0.9999962
27	825	284	861	316	round	0.9999957
27	174	665	232	704	liv	0.9999944
27	191	525	235	565	liv	0.9999926
27	1111	679	1146	719	round	0.9999919
27	1165	689	1199	723	round	0.9999914
27	584	576	613	606	round	0.9999875
27	802	383	837	417	round	0.99998415
27	334	517	366	554	round	0.9999827
27	572	437	603	471	round	0.9999795
27	275	672	310	711	round	0.9999771
27	873	187	925	227	round	0.99997616
27	571	511	600	539	round	0.9999747
27	1163	711	1191	744	round	0.99995196
27	235	682	285	724	liv	0.9998944
27	1117	738	1150	773	round	0.99989045
27	55	529	89	565	round	0.99988556
27	1157	777	1190	810	round	0.99986684
27	811	446	838	476	round	0.99986315
27	763	568	813	604	round	0.99979454
27	145	728	178	761	round	0.99965334
27	884	0	922	24	round	0.9995284
27	543	452	605	504	liv	0.9993624
27	167	535	212	589	liv	0.9990982
27	1191	85	1239	124	round	0.99908257
27	253	334	292	376	round	0.9988526
27	261	729	305	763	liv	0.99882334
27	87	761	126	792	div	0.9968298
27	1092	716	1137	756	round	0.99618214
27	1161	199	1196	239	round	0.96857655
27	1	496	38	542	dead	0.9313282
28	886	835	951	951	liv	1.0
28	832	812	914	858	liv	1.0
28	32	573	86	633	liv	1.0
28	202	213	265	274	liv	1.0
28	374	124	459	203	liv	0.9999999
28	1148	104	1188	153	liv	0.9999999
28	1115	126	1162	179	liv	0.9999999
28	650	551	759	616	liv	0.99999976
28	102	558	151	602	liv	0.99999964
28	890	152	938	206	liv	0.9999995
28	945	753	984	789	round	0.9999994
28	165	532	211	592	liv	0.9999987
28	1181	236	1217	278	round	0.9999987
28	216	314	247	343	round	0.9999982
28	1111	678	1147	716	round	0.99999785
28	289	538	326	579	round	0.99999785
28	551	548	584	581	round	0.999997
28	219	383	251	417	round	0.99999666
28	1088	718	1132	762	liv	0.9999962
28	416	556	501	597	liv	0.99999607
28	716	889	751	921	round	0.99999547
28	819	264	858	296	round	0.99999416
28	810	442	840	475	round	0.99999404
28	843	854	890	933	liv	0.99999344
28	570	436	603	473	round	0.99999344
28	192	525	235	564	liv	0.9999901
28	825	285	860	317	round	0.9999901
28	54	530	89	565	round	0.999987
28	804	383	838	419	round	0.9999825
28	584	576	614	606	round	0.9999809
28	1157	781	1190	811	round	0.9999801
28	245	570	285	605	round	0.9999615
28	1163	690	1195	722	round	0.999961
28	173	660	232	700	liv	0.99995446
28	875	189	924	227	round	0.9999393
28	143	730	175	762	round	0.99993336
28	274	672	310	710	round	0.99992657
28	883	0	921	24	round	0.9999186
28	254	334	292	375	round	0.9998697
28	571	510	600	540	round	0.99981445
28	331	519	365	553	round	0.99977654
28	1192	85	1239	125	round	0.99965775
28	261	731	305	763	liv	0.99955267
28	236	681	284	721	liv	0.9992211
28	88	761	124	795	div	0.9963528
28	546	455	601	509	liv	0.9920202
28	0	496	37	538	round	0.98816407
28	1163	712	1193	742	round	0.98809487
28	757	569	814	604	round	0.9775753
28	1121	719	1151	770	liv	0.9770999
28	1162	201	1195	243	round	0.92748606
29	374	122	459	203	liv	1.0
29	882	829	952	951	liv	1.0
29	834	814	913	862	liv	1.0
29	199	210	265	275	liv	0.9999999
29	31	569	86	634	liv	0.9999999
29	653	553	761	616	liv	0.99999976
29	890	151	940	206	liv	0.9999993
29	190	524	235	564	liv	0.9999989
29	102	559	152	603	liv	0.9999989
29	1180	236	1217	278	round	0.9999987
29	844	851	887	928	liv	0.99999857
29	216	312	249	345	round	0.99999857
29	945	755	984	790	round	0.99999785
29	290	539	326	577	round	0.99999774
29	550	547	584	581	round	0.9999974
29	1111	679	1147	715	round	0.99999726
29	716	885	752	920	round	0.99999726
29	218	382	250	416	round	0.9999969
29	826	287	859	318	round	0.9999968
29	799	384	836	418	round	0.9999957
29	1151	103	1186	155	liv	0.9999951
29	809	444	839	475	round	0.99999475
29	819	264	859	297	round	0.9999919
29	244	571	285	605	round	0.9999919
29	233	676	284	721	liv	0.99998975
29	164	536	216	594	liv	0.9999894
29	274	672	310	712	round	0.9999894
29	1091	713	1135	757	liv	0.99998295
29	1191	86	1237	123	round	0.999982
29	415	556	502	597	liv	0.9999808
29	1160	781	1192	812	round	0.99997914
29	585	576	613	607	round	0.9999759
29	873	187	922	227	round	0.99996924
29	1164	689	1198	723	round	0.9999589
29	1121	128	1170	176	liv	0.9999354
29	566	437	602	474	round	0.9999176
29	142	727	178	764	round	0.9998758
29	261	731	305	764	liv	0.99986887
29	52	531	90	565	round	0.999859
29	569	507	600	538	round	0.99983716
29	333	517	366	556	round	0.9998325
29	171	661	226	703	liv	0.9998209
29	85	766	123	796	round	0.99970907
29	546	459	599	508	liv	0.9980217
29	252	334	292	375	round	0.9976648
29	1115	726	1151	766	liv	0.9935407
29	883	0	923	27	round	0.9925769
29	1162	202	1195	244	round	0.96623737
29	1163	712	1193	740	liv	0.86866134
29	240	363	272	396	round	0.86331505
29	1	492	42	541	liv	0.8454928
29	763	568	813	606	round	0.82828915
29	760	567	816	606	liv	0.7047343
30	886	832	951	949	liv	1.0
30	377	124	458	201	liv	1.0
30	834	814	916	861	liv	1.0
30	32	573	85	634	liv	1.0
30	200	212	271	274	liv	1.0
30	652	553	761	617	liv	0.9999999
30	891	154	938	206	liv	0.99999964
30	188	525	236	565	liv	0.99999964
30	216	312	248	344	round	0.99999964
30	101	558	150	603	liv	0.9999993
30	216	383	250	416	round	0.9999982
30	550	549	583	582	round	0.9999976
30	1113	680	1146	716	round	0.9999969
30	290	539	326	578	round	0.99999666
30	244	572	286	608	round	0.9999956
30	56	532	90	567	round	0.9999956
30	943	754	983	792	round	0.99999523
30	844	855	891	934	liv	0.999995
30	718	888	752	921	round	0.99999464
30	1159	780	1191	811	round	0.99999416
30	1181	237	1218	278	round	0.9999933
30	581	576	611	606	round	0.9999933
30	873	188	924	227	round	0.9999918
30	573	511	600	538	round	0.99998283
30	170	658	225	705	liv	0.999982
30	415	557	500	597	liv	0.9999713
30	572	438	605	473	round	0.9999707
30	140	729	177	765	round	0.99996567
30	824	288	859	318	round	0.9999646
30	1163	692	1196	722	round	0.9999497
30	761	569	813	606	round	0.999931
30	253	333	293	375	round	0.99990475
30	274	672	310	711	round	0.9998667
30	1091	713	1136	758	liv	0.9998443
30	818	263	859	297	round	0.9995664
30	799	385	837	421	round	0.99934953
30	885	0	923	26	round	0.9993048
30	548	455	601	509	liv	0.9992848
30	1162	202	1197	249	round	0.99906987
30	2	494	47	542	liv	0.99850273
30	233	677	282	721	liv	0.99840647
30	262	730	304	765	liv	0.99781907
30	1190	86	1238	124	round	0.9975974
30	1162	710	1191	740	round	0.99757594
30	1119	733	1151	767	round	0.9966445
30	334	519	365	558	round	0.9950439
30	1150	104	1187	152	liv	0.9939182
30	87	764	123	796	round	0.9928334
30	166	539	216	598	liv	0.9845036
30	557	489	609	523	liv	0.85864705
30	554	488	605	520	liv	0.8398693
30	811	446	838	474	round	0.82972765
31	373	123	459	205	liv	1.0
31	882	826	954	951	liv	1.0
31	833	813	921	858	liv	1.0
31	201	212	267	275	liv	1.0
31	30	570	87	632	liv	1.0
31	654	549	752	616	liv	0.9999999
31	189	523	235	564	liv	0.99999976
31	101	558	154	603	liv	0.99999964
31	246	574	287	607	round	0.99999905
31	214	313	249	345	round	0.9999989
31	946	754	984	792	round	0.9999989
31	1181	238	1216	278	round	0.9999988
31	217	383	248	416	round	0.9999981
31	1113	679	1146	716	round	0.9999981
31	582	576	611	606	round	0.999998
31	844	851	889	932	liv	0.99999774
31	716	889	751	923	round	0.9999974
31	550	550	583	584	round	0.9999963
31	1193	85	1237	123	round	0.9999957
31	888	151	942	205	liv	0.9999956
31	810	445	841	476	round	0.99999404
31	163	538	215	595	liv	0.99999285
31	333	519	363	554	round	0.9999895
31	1164	690	1197	722	round	0.99998593
31	291	540	327	581	round	0.9999845
31	1124	129	1172	179	liv	0.9999839
31	141	729	177	765	round	0.99998295
31	874	190	925	229	round	0.9999827
31	271	672	311	712	round	0.99998224
31	549	457	615	516	liv	0.99996305
31	415	557	499	596	liv	0.99994636
31	567	438	603	475	round	0.9999453
31	1161	778	1192	810	round	0.9999331
31	570	511	600	539	round	0.99992526
31	1	496	45	541	liv	0.9998909
31	823	287	859	318	round	0.9998416
31	232	676	281	721	liv	0.99982697
31	57	532	88	566	round	0.9997503
31	883	0	922	27	round	0.9992797
31	557	486	612	520	liv	0.9990791
31	800	386	836	421	round	0.9989957
31	252	334	292	375	round	0.9985702
31	1162	710	1192	741	round	0.9982926
31	262	731	304	765	liv	0.99737155
31	86	764	122	795	round	0.9950557
31	1152	103	1186	154	liv	0.9898811
31	1162	202	1197	246	round	0.9030638
31	174	658	227	704	liv	0.8626786
31	1092	715	1133	761	liv	0.8532215
31	819	264	860	297	round	0.8128191
31	755	564	816	610	liv	0.7543692
31	757	565	816	610	round	0.6885576
31	1114	727	1149	766	liv	0.52120155
32	373	125	460	206	liv	1.0
32	885	831	951	952	liv	1.0
32	835	814	914	858	liv	1.0
32	202	212	268	276	liv	1.0
32	31	570	86	637	liv	0.9999999
32	890	152	945	211	liv	0.99999976
32	1126	126	1177	178	liv	0.99999976
32	654	552	756	614	liv	0.99999964
32	192	520	237	562	liv	0.9999995
32	102	559	153	603	liv	0.9999995
32	843	852	891	933	liv	0.9999993
32	216	383	250	416	round	0.9999989
32	219	315	252	348	round	0.9999988
32	874	188	923	228	round	0.99999845
32	247	575	288	610	round	0.99999845
32	947	752	986	793	round	0.9999982
32	1182	237	1217	277	round	0.999998
32	1113	679	1147	715	round	0.999998
32	60	530	89	564	round	0.999998
32	826	287	859	319	round	0.99999774
32	289	542	326	578	round	0.9999969
32	818	263	859	298	round	0.9999968
32	811	447	845	479	round	0.99999654
32	333	519	365	554	round	0.9999962
32	551	549	584	582	round	0.9999939
32	416	557	500	596	liv	0.9999931
32	253	334	294	373	round	0.9999912
32	83	764	121	797	round	0.99998844
32	270	674	309	711	round	0.9999882
32	1193	86	1235	122	round	0.99998415
32	585	576	613	606	round	0.999984
32	166	534	216	592	liv	0.99998
32	1164	691	1198	724	round	0.999979
32	803	384	836	419	round	0.9999765
32	1153	102	1186	150	liv	0.999969
32	1093	712	1138	752	liv	0.9999504
32	1115	733	1150	766	round	0.9999502
32	182	661	227	701	round	0.99994755
32	1161	778	1192	810	round	0.9999417
32	567	438	604	475	round	0.9999325
32	716	889	754	924	round	0.9998925
32	233	677	278	721	liv	0.99986005
32	142	731	179	765	round	0.999711
32	263	732	304	765	liv	0.9996358
32	759	566	816	610	round	0.998963
32	1162	709	1190	740	round	0.9976999
32	544	457	602	504	liv	0.99511176
32	572	507	601	537	round	0.9941532
32	1	499	50	544	liv	0.9926778
32	1162	201	1197	244	round	0.746495
32	885	0	923	26	round	0.685015
33	371	122	458	204	liv	1.0
33	885	826	949	952	liv	1.0
33	838	814	916	858	liv	1.0
33	101	559	155	605	liv	0.9999999
33	1149	103	1187	155	liv	0.9999999
33	203	218	265	276	liv	0.9999999
33	654	551	761	619	liv	0.99999976
33	26	574	87	636	liv	0.99999964
33	193	513	246	562	liv	0.99999964
33	845	854	893	935	liv	0.9999993
33	1113	679	1147	714	round	0.99999917
33	874	189	923	227	round	0.9999989
33	166	535	214	597	liv	0.9999988
33	216	314	250	348	round	0.99999857
33	826	288	858	319	round	0.99999833
33	1181	236	1217	278	round	0.999998
33	1118	735	1151	766	round	0.99999785
33	230	675	280	721	liv	0.9999969
33	817	264	858	297	round	0.9999962
33	811	446	845	478	round	0.99999475
33	246	574	286	609	round	0.9999944
33	415	557	498	595	liv	0.9999943
33	889	152	942	205	liv	0.9999939
33	948	754	986	794	round	0.99999344
33	585	575	614	605	round	0.9999932
33	143	725	181	762	round	0.9999925
33	551	548	585	581	round	0.9999912
33	270	674	308	712	round	0.9999894
33	1195	88	1235	123	round	0.9999883
33	291	539	329	578	round	0.9999875
33	800	382	836	417	round	0.99998736
33	716	888	752	923	round	0.9999862
33	1164	690	1197	722	round	0.99998534
33	1162	777	1193	811	round	0.9999832
33	251	332	294	374	round	0.99997175
33	758	569	817	608	liv	0.9999715
33	568	440	602	476	round	0.9999684
33	218	383	249	420	round	0.99993014
33	884	0	922	25	round	0.9998356
33	59	532	89	565	round	0.9998167
33	177	663	226	702	round	0.99980086
33	1091	713	1135	753	liv	0.9997149
33	1160	710	1190	738	round	0.99927586
33	573	510	604	538	round	0.99821883
33	328	521	367	557	round	0.99775225
33	262	730	306	764	liv	0.9942865
33	83	759	122	796	div	0.991679
33	1	499	49	543	liv	0.9912918
33	1163	198	1195	244	div	0.75356823
34	884	827	951	953	liv	1.0
34	835	815	930	857	liv	1.0
34	29	573	88	632	liv	1.0
34	203	215	266	277	liv	0.9999999
34	374	123	458	205	liv	0.9999999
34	194	502	248	560	liv	0.9999999
34	1126	129	1172	181	liv	0.99999976
34	101	560	156	603	liv	0.99999976
34	655	550	760	618	liv	0.99999976
34	845	854	893	934	liv	0.99999976
34	892	152	946	211	liv	0.9999995
34	167	533	216	600	liv	0.99999917
34	1113	678	1147	714	round	0.9999988
34	875	190	923	227	round	0.9999988
34	1181	235	1216	278	round	0.9999988
34	950	754	985	792	round	0.99999845
34	825	288	858	320	round	0.999998
34	1151	103	1189	153	liv	0.9999968
34	217	313	250	346	round	0.99999666
34	417	556	499	596	liv	0.99999607
34	59	534	91	567	round	0.99999523
34	1196	85	1234	123	round	0.99999416
34	1162	778	1193	810	round	0.99999213
34	803	382	835	416	round	0.99999213
34	1118	733	1150	766	round	0.99998903
34	819	264	858	297	round	0.9999881
34	569	439	604	475	round	0.99998784
34	810	446	842	476	round	0.9999862
34	1090	711	1133	753	liv	0.99998605
34	583	576	613	607	round	0.9999857
34	217	383	249	419	round	0.9999777
34	274	672	311	710	round	0.9999759
34	552	547	585	582	round	0.9999709
34	717	888	751	921	round	0.9999696
34	261	732	305	764	liv	0.99985075
34	290	540	331	580	round	0.99982774
34	758	567	815	609	liv	0.9997378
34	146	728	183	765	round	0.999348
34	234	572	287	609	liv	0.9990146
34	1165	692	1197	724	round	0.99847203
34	1163	711	1192	740	round	0.99799514
34	886	0	922	26	round	0.99785477
34	253	335	292	374	round	0.9978415
34	572	508	604	537	round	0.99635196
34	543	454	599	505	liv	0.9931844
34	178	659	226	702	liv	0.98091847
34	236	681	278	722	round	0.93140876
34	1164	202	1195	243	round	0.8974527
34	82	761	121	794	div	0.816098
34	1170	193	1198	225	round	0.7633873
34	3	497	44	539	liv	0.65514165
34	326	513	363	552	div	0.6537526
34	3	499	42	539	round	0.51929176
35	890	826	955	952	liv	1.0
35	835	815	924	857	liv	1.0
35	203	215	267	274	liv	1.0
35	373	122	458	205	liv	0.9999999
35	169	532	216	594	liv	0.9999999
35	25	575	84	630	liv	0.9999999
35	197	500	247	557	liv	0.99999976
35	1148	105	1188	151	liv	0.99999964
35	1126	130	1181	184	liv	0.99999964
35	653	551	756	618	liv	0.99999964
35	103	560	154	605	liv	0.99999964
35	891	152	946	211	liv	0.99999917
35	1112	677	1148	714	round	0.99999917
35	846	855	894	937	liv	0.9999989
35	416	556	500	596	liv	0.9999989
35	1181	236	1217	278	round	0.9999988
35	213	310	247	343	round	0.99999857
35	218	383	250	418	round	0.99999833
35	803	381	836	413	round	0.99999785
35	233	573	286	611	liv	0.99999774
35	811	442	844	475	round	0.9999974
35	874	189	923	227	round	0.9999974
35	948	751	985	792	round	0.99999666
35	291	540	332	579	round	0.99999547
35	1162	779	1191	810	round	0.9999939
35	1197	85	1236	121	round	0.9999932
35	718	889	750	920	round	0.9999914
35	552	548	585	583	round	0.9999908
35	826	287	858	318	round	0.9999901
35	567	437	603	475	round	0.99999
35	575	510	607	539	round	0.99998903
35	1120	733	1150	766	round	0.9999876
35	584	575	613	606	round	0.99998665
35	274	671	311	710	round	0.9999856
35	818	263	858	296	round	0.99998355
35	143	731	180	766	round	0.99998283
35	0	493	50	535	liv	0.9999808
35	60	534	90	566	round	0.9999491
35	320	514	363	548	round	0.99992454
35	1157	709	1193	740	round	0.9996451
35	235	678	279	721	liv	0.9987908
35	262	730	303	763	liv	0.9982698
35	1165	695	1196	727	round	0.9826864
35	81	759	121	795	div	0.9797798
35	886	0	927	23	round	0.97769064
35	1091	712	1130	755	liv	0.9741755
35	181	659	224	703	liv	0.9621499
35	759	568	813	605	liv	0.92624885
35	1163	198	1195	241	div	0.9058722
35	252	336	292	375	round	0.902385
36	887	830	955	945	liv	1.0
36	378	124	458	204	liv	1.0
36	23	571	86	631	liv	1.0
36	154	530	220	594	liv	1.0
36	204	214	266	273	liv	1.0
36	831	814	927	859	liv	1.0
36	1145	104	1186	155	liv	1.0
36	655	549	757	622	liv	0.9999999
36	1127	134	1181	193	liv	0.9999999
36	890	154	947	213	liv	0.99999976
36	102	559	154	603	liv	0.99999964
36	826	288	859	320	round	0.9999994
36	195	503	241	553	liv	0.99999917
36	1181	237	1216	276	round	0.99999917
36	218	383	249	416	round	0.99999905
36	1113	679	1147	714	round	0.9999989
36	947	751	985	790	round	0.99999845
36	417	555	498	596	liv	0.9999975
36	873	190	920	228	round	0.9999975
36	844	856	892	933	liv	0.9999974
36	213	310	248	341	round	0.999997
36	806	381	838	414	round	0.99999607
36	818	263	858	297	round	0.99999523
36	813	443	847	477	round	0.9999949
36	274	673	310	711	round	0.9999932
36	290	541	331	579	round	0.9999919
36	717	889	753	922	round	0.9999918
36	1161	780	1190	811	round	0.99999034
36	567	440	602	475	round	0.99998975
36	550	550	586	582	round	0.9999895
36	1195	85	1234	123	round	0.99998724
36	324	513	360	548	round	0.99998116
36	584	574	613	605	round	0.99996495
36	60	534	90	565	round	0.9999144
36	1090	710	1133	754	liv	0.99990773
36	885	0	922	23	round	0.9998419
36	239	570	283	611	round	0.9996711
36	145	731	185	766	round	0.9983772
36	0	490	53	540	liv	0.9982089
36	1117	732	1149	764	round	0.997773
36	84	758	119	795	div	0.9974573
36	236	679	279	722	liv	0.9965491
36	181	661	227	704	liv	0.9961569
36	553	487	612	530	liv	0.99557495
36	1165	189	1200	236	liv	0.9941554
36	577	505	610	539	liv	0.9908309
36	262	729	306	762	liv	0.98802954
36	1160	715	1192	743	round	0.9842211
36	252	335	292	375	round	0.9620343
36	1165	184	1203	225	liv	0.9568335
36	764	570	814	604	round	0.91501004
36	1164	202	1195	243	round	0.7546759
36	1161	698	1197	730	round	0.50917447
37	375	121	457	201	liv	1.0
37	885	835	953	948	liv	1.0
37	203	213	265	275	liv	1.0
37	830	813	934	858	liv	1.0
37	22	572	86	629	liv	0.9999999
37	655	545	755	626	liv	0.9999999
37	170	533	216	595	liv	0.9999999
37	1145	108	1187	151	liv	0.99999976
37	892	155	944	211	liv	0.99999976
37	193	501	249	555	liv	0.99999964
37	103	559	152	604	liv	0.9999995
37	542	454	597	499	liv	0.9999994
37	947	753	983	790	round	0.9999994
37	844	851	892	935	liv	0.99999905
37	217	312	249	343	round	0.99999905
37	1111	679	1148	714	round	0.9999989
37	1182	236	1216	277	round	0.9999987
37	232	560	281	608	liv	0.99999857
37	873	189	921	226	round	0.9999974
37	417	556	497	596	liv	0.9999969
37	555	495	608	540	liv	0.9999969
37	804	381	838	414	round	0.99999654
37	59	534	91	565	round	0.99999607
37	272	674	310	712	round	0.99999535
37	219	383	250	417	round	0.9999949
37	823	288	857	318	round	0.99999464
37	549	548	584	580	round	0.99999416
37	1194	85	1231	122	round	0.99999416
37	574	437	603	473	round	0.9999937
37	1160	778	1192	810	round	0.99999344
37	810	441	846	475	round	0.9999932
37	1126	136	1177	183	liv	0.9999906
37	764	568	809	604	round	0.9999882
37	817	264	858	295	round	0.9999869
37	290	541	331	578	round	0.99998057
37	585	574	613	605	round	0.999961
37	1118	733	1150	765	round	0.9999496
37	331	518	361	549	round	0.9999392
37	0	488	48	535	liv	0.9998976
[truncated: 67,530 more rows]
