# Supplementary material for: CeCILE - An Artificial Intelligence Based Cell-Detection for the Evaluation of Radiation Effects in Eucaryotic Cells
Source: Front Oncol. 2021 Jun 30;11:688333. doi: 10.3389/fonc.2021.688333 (PMC8278143; doi:10.3389/fonc.2021.688333)
Supplement: Supplementary file 4 [file Table_7.xlsx]

## Sheet: irradiated
frame	label	start X	start Y	end X	end Y
1	liv	422	60	468	118
1	liv	305	95	360	142
1	liv	379	250	424	305
1	liv	397	222	464	276
1	liv	425	208	469	258
1	liv	461	174	505	243
1	liv	493	195	547	258
1	liv	448	258	531	335
1	liv	536	311	598	359
1	liv	571	310	614	366
1	liv	976	262	1035	299
1	liv	994	322	1047	374
1	round	367	314	411	352
1	liv	535	462	589	501
1	liv	569	501	619	551
1	liv	520	536	575	580
1	liv	498	571	551	627
1	liv	428	504	487	569
1	liv	412	593	448	696
1	liv	390	697	466	756
1	liv	1300	289	1340	358
1	liv	1333	280	1376	364
1	liv	790	496	850	543
1	liv	797	546	860	578
1	liv	329	913	376	979
1	liv	372	890	473	975
1	liv	369	945	454	992
1	liv	477	897	544	981
1	round	443	994	475	1034
1	round	506	998	546	1033
1	round	461	967	501	995
1	round	528	857	574	905
1	round	167	556	211	595
1	round	483	501	522	539
1	round	859	199	895	246
1	round	908	46	959	92
1	round	612	0	637	16
1	round	649	0	680	18
1	round	1275	666	1321	709
1	round	1313	677	1365	725
1	dead	378	907	396	928
1	round	1332	544	1387	595
1	liv	1362	715	1388	746
1	liv	1359	748	1388	773
1	liv	360	994	442	1038
20	liv	881	54	952	130
20	liv	420	32	460	110
20	liv	469	181	514	239
20	liv	496	193	541	264
20	liv	450	263	541	339
20	liv	401	234	455	295
20	liv	374	255	419	302
20	liv	533	315	598	351
20	liv	556	312	619	365
20	liv	962	266	1027	299
20	liv	997	316	1043	383
20	liv	440	481	486	581
20	liv	482	489	532	575
20	liv	521	525	571	581
20	liv	567	503	609	546
20	liv	495	576	546	632
20	liv	414	612	462	678
20	liv	799	499	853	544
20	liv	801	534	860	578
20	liv	1326	277	1373	360
20	liv	399	692	459	757
20	liv	364	893	468	955
20	liv	470	893	529	989
20	liv	362	943	454	982
20	liv	354	987	458	1034
20	liv	458	985	490	1038
20	liv	1291	665	1336	711
20	liv	1318	686	1366	726
20	dead	376	912	394	928
20	round	467	963	503	994
20	round	512	1001	549	1033
20	round	528	857	564	897
20	round	319	906	362	946
20	round	175	561	205	591
20	round	564	453	601	491
20	round	1298	302	1328	335
20	round	857	212	901	251
20	round	364	304	400	342
20	round	429	210	468	255
20	round	315	85	359	125
20	round	607	0	636	13
20	round	648	0	676	20
20	round	1345	555	1388	594
20	liv	1367	710	1388	760
20	liv	1357	761	1388	812
40	liv	613	0	658	21
40	liv	641	0	684	23
40	liv	892	68	945	135
40	liv	422	52	461	111
40	liv	472	178	516	239
40	liv	489	203	543	261
40	liv	369	220	476	266
40	liv	368	258	427	310
40	liv	439	262	547	347
40	liv	518	318	596	351
40	liv	545	309	621	369
40	liv	999	315	1042	377
40	liv	1328	281	1382	356
40	liv	480	470	539	559
40	liv	518	535	574	575
40	liv	497	593	567	656
40	liv	417	627	468	700
40	liv	1324	693	1371	724
40	liv	375	897	458	962
40	liv	478	896	547	984
40	liv	365	944	447	986
40	liv	342	981	453	1039
40	liv	458	989	509	1039
40	round	461	960	505	996
40	round	513	998	545	1033
40	round	520	865	555	897
40	round	320	913	356	946
40	round	408	710	458	753
40	round	800	541	838	578
40	round	804	501	854	546
40	round	569	506	608	544
40	round	575	443	611	483
40	round	438	516	473	549
40	round	453	530	486	560
40	round	173	561	205	590
40	round	427	216	465	253
40	round	363	295	410	333
40	round	319	93	358	131
40	round	877	213	916	250
40	round	965	271	1028	307
40	round	1300	304	1328	336
40	round	1346	556	1384	592
40	round	1299	672	1338	710
40	liv	1366	715	1388	765
40	liv	1350	770	1388	839
60	liv	613	1	683	36
60	liv	888	51	949	136
60	liv	380	166	465	241
60	liv	463	154	518	242
60	liv	488	198	546	263
60	liv	383	249	446	295
60	liv	443	263	541	356
60	liv	533	314	588	361
60	liv	574	286	656	367
60	liv	498	450	567	523
60	liv	451	480	506	542
60	liv	436	512	498	588
60	liv	484	521	565	576
60	liv	418	618	480	707
60	liv	368	889	451	943
60	liv	370	946	444	985
60	liv	477	897	538	994
60	liv	466	990	498	1038
60	liv	499	597	561	652
60	round	416	60	460	113
60	round	309	97	359	140
60	round	363	300	400	339
60	round	424	218	464	258
60	round	860	228	904	281
60	round	1303	307	1334	344
60	round	1005	317	1037	352
60	round	803	499	855	544
60	round	800	535	833	574
60	round	566	498	601	543
60	round	175	566	205	596
60	round	415	706	452	750
60	round	512	865	555	900
60	round	320	908	355	950
60	round	515	1003	545	1033
60	liv	990	345	1041	381
60	liv	966	266	1026	309
60	liv	579	442	644	480
60	round	460	960	493	999
60	round	1297	661	1334	696
60	liv	1321	681	1369	727
60	liv	1327	265	1388	352
60	round	1350	550	1386	586
60	round	1366	718	1388	755
60	liv	1351	753	1388	820
60	liv	380	983	458	1040
80	liv	870	27	941	139
80	liv	614	1	659	79
80	liv	636	0	669	19
80	liv	367	141	448	230
80	liv	453	169	521	240
80	liv	491	189	568	267
80	liv	372	234	431	308
80	liv	420	256	549	370
80	liv	526	307	596	366
80	liv	590	286	666	370
80	liv	446	442	517	500
80	liv	568	424	616	482
80	liv	499	461	570	534
80	liv	440	507	495	583
80	liv	475	518	561	572
80	liv	423	634	484	699
80	liv	1328	270	1382	356
80	liv	415	722	468	773
80	liv	376	895	445	953
80	liv	374	950	436	995
80	liv	499	903	535	994
80	liv	466	911	509	989
80	liv	506	589	548	639
80	liv	522	609	562	647
80	liv	1328	686	1379	730
80	round	422	219	467	267
80	round	364	303	400	341
80	round	415	59	463	107
80	round	316	98	356	134
80	round	859	225	898	263
80	round	968	270	1028	310
80	round	1013	304	1059	348
80	round	997	334	1037	381
80	round	802	503	855	543
80	round	799	545	835	580
80	round	569	501	613	538
80	round	175	564	210	596
80	round	1296	307	1334	344
80	round	1303	656	1341	700
80	round	519	865	557	898
80	round	319	911	356	948
80	round	462	966	499	999
80	round	1362	549	1388	594
80	round	1370	723	1388	761
80	liv	1352	768	1386	832
80	liv	505	1009	549	1040
80	liv	374	990	450	1037
80	liv	469	999	502	1040
100	dead	1330	276	1383	335
100	round	528	866	553	899
100	round	325	912	357	949
100	round	181	561	210	594
100	round	581	446	619	485
100	round	808	488	856	535
100	round	794	541	838	585
100	round	1311	668	1340	701
100	round	1322	686	1370	729
100	round	1303	309	1332	345
100	round	858	211	903	258
100	round	316	101	355	138
100	round	421	220	464	258
100	round	354	301	398	340
100	round	997	344	1044	386
100	liv	874	28	937	128
100	liv	601	9	644	57
100	liv	627	0	666	22
100	liv	407	77	461	188
100	liv	319	139	405	212
100	liv	454	171	539	264
100	liv	511	188	632	243
100	liv	375	224	459	316
100	liv	430	255	537	361
100	liv	599	274	675	347
100	liv	542	323	618	371
100	liv	971	273	1030	313
100	liv	961	310	1046	368
100	liv	448	433	529	501
100	liv	506	466	577	526
100	liv	583	501	641	560
100	liv	498	531	571	583
100	liv	450	513	495	590
100	liv	514	579	570	632
100	liv	519	623	586	678
100	liv	424	647	499	715
100	liv	420	716	479	759
100	liv	380	896	457	941
100	liv	380	941	439	1003
100	liv	484	915	540	998
100	liv	443	918	502	999
100	round	1361	550	1388	588
100	liv	1370	717	1388	757
100	liv	1337	787	1388	827
100	liv	521	1009	586	1040
100	liv	464	996	502	1039
100	liv	414	996	453	1040
120	liv	875	0	915	27
120	liv	884	42	930	116
120	liv	413	71	453	163
120	liv	362	128	424	201
120	liv	385	241	443	316
120	liv	465	168	550	264
120	liv	510	169	639	243
120	liv	424	254	537	357
120	liv	608	266	694	339
120	liv	545	308	613	371
120	liv	949	299	1072	354
120	liv	951	356	1019	430
120	liv	793	474	844	536
120	liv	586	443	660	493
120	liv	448	420	534	494
120	liv	480	469	575	534
120	liv	450	531	482	602
120	liv	508	536	571	582
120	liv	507	568	561	627
120	liv	519	621	593	681
120	liv	444	654	518	707
120	liv	429	696	467	748
120	liv	378	873	432	938
120	liv	285	915	359	958
120	liv	505	920	565	1002
120	liv	433	936	507	1012
120	dead	410	1011	430	1033
120	liv	376	959	427	1002
120	dead	1333	271	1381	332
120	liv	967	274	1023	310
120	round	1296	310	1327	341
120	round	852	219	898	259
120	round	589	15	627	50
120	round	627	0	670	20
120	round	320	100	360	143
120	round	429	220	462	258
120	round	352	291	396	341
120	round	179	564	208	593
120	round	582	505	622	541
120	round	790	548	827	578
120	round	1308	658	1345	695
120	round	1326	688	1373	733
120	round	520	863	560	902
120	round	1354	558	1388	596
120	liv	1368	711	1388	755
120	liv	1348	793	1388	846
120	liv	425	1003	453	1037
120	round	460	1005	503	1040
120	round	526	1012	564	1040
140	liv	882	31	929	98
140	liv	882	0	944	20
140	liv	409	71	454	166
140	liv	377	144	454	204
140	liv	520	164	632	247
140	liv	466	174	548	259
140	liv	374	206	441	264
140	liv	428	220	474	279
140	liv	367	255	444	314
140	liv	317	267	402	330
140	liv	442	263	537	369
140	liv	608	269	696	342
140	liv	540	316	614	368
140	liv	452	422	538	484
140	liv	573	420	661	481
140	liv	504	472	571	527
140	liv	594	483	654	535
140	liv	439	519	481	603
140	liv	508	536	569	592
140	liv	472	568	550	627
140	liv	527	617	610	671
140	liv	448	651	510	701
140	liv	393	691	456	752
140	liv	968	318	1074	387
140	liv	957	367	1013	450
140	liv	785	465	837	519
140	liv	316	920	370	972
140	liv	369	911	431	957
140	liv	397	873	464	913
140	liv	512	926	588	994
140	liv	433	934	499	1010
140	div	387	949	425	988
140	dead	408	993	430	1021
140	dead	1328	267	1381	334
140	round	806	511	849	544
140	round	792	541	827	579
140	round	519	867	554	900
140	round	532	999	570	1038
140	round	178	563	207	593
140	round	326	95	376	137
140	round	852	210	897	248
140	round	597	17	628	47
140	round	971	269	1016	300
140	round	631	0	667	16
140	round	1300	311	1330	342
140	round	1304	656	1340	695
140	round	1334	691	1371	731
140	round	1352	553	1388	590
140	liv	1366	709	1388	751
140	liv	468	1021	504	1040
140	liv	438	990	460	1039
140	liv	410	1003	439	1036
160	liv	805	0	904	28
160	liv	883	25	933	79
160	liv	413	73	465	168
160	liv	371	135	457	206
160	liv	503	161	633	251
160	liv	468	175	538	257
160	liv	417	212	485	282
160	liv	372	217	453	298
160	liv	375	288	448	363
160	liv	409	272	543	418
160	liv	611	270	686	336
160	liv	540	326	610	379
160	liv	463	421	562	474
160	liv	982	314	1059	385
160	liv	950	387	1033	475
160	liv	738	461	822	515
160	liv	815	506	874	568
160	liv	737	545	811	596
160	liv	587	424	660	479
160	liv	588	472	647	525
160	liv	499	484	584	544
160	liv	444	520	481	602
160	liv	510	541	637	607
160	liv	463	572	545	632
160	liv	536	633	617	723
160	liv	447	662	516	718
160	liv	378	884	433	953
160	liv	308	929	383	1006
160	liv	389	930	432	1008
160	liv	422	934	505	1005
160	liv	500	930	580	1001
160	dead	443	1012	464	1032
160	dead	1334	276	1380	331
160	liv	1330	658	1385	708
160	liv	1325	692	1386	732
160	round	521	857	552	899
160	round	305	915	356	958
160	round	408	709	455	753
160	round	174	561	212	598
160	round	334	85	371	122
160	round	598	15	635	43
160	round	858	209	893	253
160	round	971	270	1008	313
160	round	1307	310	1334	341
160	round	1311	644	1354	691
160	round	627	0	675	19
160	div	341	287	374	331
160	round	1352	558	1388	601
160	round	532	1011	574	1040
160	liv	1371	730	1388	753
160	liv	443	1010	497	1040
160	liv	393	985	430	1040
160	liv	422	998	470	1040
180	liv	308	20	352	94
180	liv	297	51	347	131
180	liv	421	68	461	146
180	liv	813	0	918	42
180	liv	839	166	895	233
180	liv	882	221	985	273
180	liv	978	314	1055	388
180	liv	964	391	1039	468
180	liv	365	141	473	208
180	liv	515	164	633	240
180	liv	461	174	544	257
180	liv	417	211	497	294
180	liv	369	201	429	298
180	liv	330	277	380	329
180	liv	338	300	408	339
180	liv	394	310	454	415
180	liv	410	251	546	412
180	liv	604	250	697	326
180	liv	538	311	607	370
180	liv	447	406	562	467
180	liv	579	421	653	474
180	liv	748	422	816	511
180	liv	814	483	897	534
180	liv	599	466	677	520
180	liv	500	482	570	536
180	liv	514	543	660	626
180	liv	478	571	538	633
180	liv	519	631	577	737
180	liv	438	642	513	711
180	liv	480	819	548	889
180	liv	299	902	368	963
180	liv	377	870	450	948
180	liv	319	910	396	993
180	liv	344	934	425	1001
180	liv	465	881	541	961
180	liv	412	919	508	1001
180	liv	475	943	573	1011
180	dead	438	980	473	1005
180	liv	1317	639	1373	700
180	dead	1333	274	1385	328
180	round	1300	297	1335	336
180	round	964	269	1008	305
180	round	885	30	927	73
180	round	626	1	666	17
180	round	595	12	626	49
180	round	750	527	804	575
180	round	439	528	478	586
180	round	175	561	208	592
180	round	417	710	453	754
180	liv	1327	548	1387	603
180	liv	1366	720	1388	762
180	liv	1326	690	1388	722
180	liv	1325	660	1388	707
180	liv	332	990	401	1040
180	liv	444	1003	515	1040
180	round	528	1010	570	1040
200	liv	249	40	337	130
200	liv	318	15	361	90
200	liv	420	62	465	127
200	liv	447	80	557	163
200	liv	367	135	460	198
200	liv	369	182	430	293
200	liv	416	186	482	286
200	liv	473	167	550	265
200	liv	533	150	637	234
200	liv	813	131	881	230
200	liv	883	208	982	263
200	liv	597	247	697	327
200	liv	473	263	531	323
200	liv	326	281	392	339
200	liv	383	291	460	336
200	liv	385	322	455	395
200	liv	526	318	610	378
200	liv	982	310	1051	394
200	liv	960	393	1052	475
200	liv	730	386	816	501
200	liv	837	497	940	557
200	liv	575	421	638	474
200	liv	603	459	692	517
200	liv	495	477	585	537
200	liv	505	536	680	612
200	liv	476	566	546	626
200	liv	507	643	580	742
200	liv	689	543	759	603
200	liv	1311	640	1371	706
200	liv	486	839	538	892
200	liv	380	821	487	892
200	liv	467	889	565	959
200	liv	401	883	486	986
200	liv	284	837	375	956
200	liv	312	912	405	995
200	liv	467	949	547	1012
200	liv	510	983	580	1031
200	liv	370	319	483	463
200	dead	1330	271	1383	330
200	round	1303	299	1332	331
200	round	965	267	1002	305
200	round	887	28	929	78
200	round	632	1	661	32
200	round	587	2	624	44
200	round	179	566	212	597
200	round	500	427	535	463
200	round	431	535	469	585
200	round	459	648	494	692
200	round	406	709	457	755
200	liv	1324	561	1388	641
200	liv	1348	660	1388	726
200	round	1370	730	1388	775
200	liv	248	990	315	1040
200	liv	333	980	399	1040
200	liv	449	988	508	1039
288	round	620	0	677	20
288	liv	302	0	344	42
288	liv	548	0	600	79
288	liv	520	39	567	100
288	liv	431	37	512	106
288	liv	266	59	375	160
288	liv	494	82	655	192
288	liv	430	117	506	165
288	liv	379	137	447	197
288	liv	365	154	421	246
288	liv	533	150	615	199
288	liv	416	198	476	286
288	liv	461	201	516	246
288	liv	502	203	555	291
288	liv	550	213	625	320
288	liv	597	217	681	276
288	liv	623	258	706	307
288	liv	350	240	437	331
288	liv	426	275	471	351
288	liv	451	259	518	342
288	liv	292	325	359	400
288	liv	347	316	417	417
288	liv	412	337	494	413
288	liv	483	324	567	364
288	liv	560	318	636	391
288	liv	463	365	541	466
288	liv	292	421	441	499
288	liv	377	460	453	522
288	liv	580	403	651	470
288	liv	536	405	596	513
288	liv	477	438	542	554
288	liv	347	510	483	591
288	liv	433	541	497	616
288	liv	388	549	451	637
288	liv	521	515	603	579
288	liv	585	471	650	556
288	liv	647	418	712	502
288	liv	491	566	598	651
288	liv	568	574	672	658
288	liv	381	632	480	712
288	liv	326	641	399	740
288	liv	461	622	537	710
288	liv	509	656	579	749
288	liv	470	696	542	771
288	liv	405	704	474	754
288	liv	438	760	500	825
288	liv	384	772	454	875
288	liv	341	812	417	905
288	liv	288	858	412	966
288	liv	423	830	479	880
288	liv	446	846	500	894
288	liv	497	847	554	903
288	liv	421	875	491	975
288	liv	474	885	532	956
288	liv	426	936	514	1025
288	liv	557	821	628	892
288	liv	653	761	750	863
288	liv	612	910	722	976
288	liv	564	961	667	1021
288	liv	309	981	396	1040
288	liv	529	1014	571	1040
288	liv	446	1021	483	1038
288	round	301	941	340	978
288	round	179	564	205	597
288	liv	885	3	930	73
288	liv	770	14	878	92
288	liv	868	94	945	141
288	liv	860	141	911	207
288	div	895	195	933	237
288	liv	1005	284	1063	386
288	liv	967	288	1012	355
288	dead	952	283	983	315
288	liv	961	393	1060	466
288	liv	890	430	996	526
288	liv	758	478	820	537
288	liv	681	506	746	607
288	liv	892	561	987	687
288	liv	1207	537	1305	606
288	liv	1269	599	1316	657
432	liv	188	1	283	93
432	liv	308	1	351	60
432	liv	384	0	445	37
432	liv	428	0	538	95
432	liv	482	1	538	48
432	liv	520	16	601	70
432	liv	516	41	630	105
432	liv	622	0	690	65
432	liv	712	0	755	56
432	liv	1003	0	1059	58
432	liv	969	19	1070	76
432	liv	986	67	1069	119
432	dead	1013	89	1046	119
432	liv	908	70	974	131
432	liv	862	38	911	129
432	liv	773	55	861	96
432	liv	803	95	907	165
432	liv	892	125	948	227
432	liv	852	194	893	246
432	liv	865	240	902	301
432	liv	894	195	931	307
432	round	953	221	999	256
432	round	966	250	1002	284
432	liv	387	48	436	86
432	liv	381	89	457	182
432	round	338	63	379	98
432	round	348	117	385	154
432	liv	273	121	375	185
432	liv	280	166	352	233
432	liv	447	102	529	258
432	liv	526	121	577	224
432	liv	352	171	477	232
432	liv	414	182	512	276
432	liv	378	233	430	322
432	liv	278	216	354	273
432	liv	420	273	489	313
432	liv	204	194	258	264
432	dead	241	235	271	268
432	liv	196	297	256	377
432	liv	247	287	283	343
432	liv	264	283	329	326
432	liv	323	269	390	321
432	liv	295	327	378	379
432	liv	296	375	358	429
432	liv	382	311	457	403
432	liv	443	312	509	386
432	liv	430	367	513	419
432	liv	491	299	561	388
432	liv	506	258	621	301
432	liv	520	286	655	396
432	liv	568	174	628	217
432	liv	548	225	648	268
432	liv	615	169	658	225
432	liv	651	157	705	233
432	liv	701	193	754	255
432	liv	659	272	713	315
432	liv	705	282	764	327
432	liv	927	277	1043	346
432	dead	976	300	993	321
432	dead	1299	280	1330	311
432	liv	1270	292	1317	320
432	liv	504	391	613	448
432	liv	541	408	626	483
432	liv	383	411	488	437
432	liv	405	437	439	476
432	liv	426	451	450	478
432	round	434	436	467	465
432	dead	451	437	517	476
432	liv	467	426	529	488
432	liv	340	429	411	524
432	liv	186	383	314	488
432	liv	165	497	236	573
432	liv	137	520	187	577
432	liv	263	514	361	593
432	liv	381	484	463	566
432	liv	352	514	439	586
432	liv	473	475	541	607
432	liv	417	552	487	625
432	liv	29	616	143	699
432	liv	214	601	307	677
432	liv	516	542	618	617
432	liv	483	577	527	644
432	liv	386	583	456	640
432	liv	319	583	390	641
432	liv	304	605	426	712
432	liv	410	619	512	692
432	liv	493	623	569	694
432	liv	512	602	609	658
432	liv	387	667	453	726
432	liv	447	686	512	748
432	liv	433	701	481	795
432	liv	391	721	444	780
432	liv	321	711	384	755
432	liv	328	748	386	797
432	liv	293	764	342	867
432	liv	317	804	380	919
432	liv	384	793	429	842
432	liv	469	786	533	850
432	liv	504	739	584	808
432	liv	580	742	654	799
432	liv	416	814	476	894
432	liv	365	843	457	924
432	liv	293	877	370	924
432	liv	248	914	343	942
432	liv	182	844	284	984
432	liv	139	773	239	872
432	liv	128	843	172	962
432	liv	148	966	204	1038
432	liv	241	938	303	1008
432	liv	215	978	333	1014
432	liv	409	936	490	1022
432	liv	495	852	591	952
432	liv	483	915	585	982
432	liv	475	959	552	1025
432	liv	422	1017	481	1040
432	liv	578	801	671	850
432	liv	568	844	645	902
432	liv	622	867	753	916
432	liv	593	913	703	969
432	liv	701	935	790	1038
432	liv	608	977	701	1040
432	liv	556	969	606	1032
432	liv	599	602	671	687
432	liv	673	578	728	693
432	liv	617	679	687	758
432	liv	694	646	811	816
432	liv	609	490	696	573
432	liv	688	523	764	580
432	liv	767	464	850	534
432	liv	879	433	966	490
432	liv	872	487	934	533
432	liv	919	525	975	630
432	liv	964	590	1044	656
432	div	674	457	722	494
432	round	975	398	1015	434
432	liv	1111	433	1213	531
432	liv	1205	522	1268	629
432	liv	1195	629	1306	722
432	liv	1305	597	1353	683
432	round	1319	536	1356	576
432	liv	1319	676	1387	749
432	liv	1330	755	1384	910
432	round	1295	791	1331	833
432	liv	1360	219	1388	275
576	liv	1211	7	1305	73
576	dead	1023	49	1062	85
576	dead	1015	90	1048	119
576	round	1010	74	1051	103
576	liv	884	9	956	49
576	liv	844	24	997	80
576	liv	832	42	894	85
576	liv	918	77	974	113
576	liv	860	81	925	130
576	liv	760	0	855	84
576	liv	787	89	963	145
576	liv	764	109	841	165
576	liv	700	1	777	49
576	liv	675	16	757	78
576	liv	691	76	773	152
576	liv	559	126	708	156
576	liv	657	135	741	192
576	liv	731	127	781	230
576	liv	604	147	681	215
576	liv	482	1	531	63
576	liv	524	4	580	62
576	liv	556	16	639	112
576	liv	618	40	678	102
576	dead	602	19	633	57
576	liv	176	1	231	48
576	liv	280	0	318	107
576	liv	302	0	356	41
576	liv	325	10	372	68
576	liv	342	6	398	71
576	liv	301	36	350	92
576	liv	313	51	396	106
576	liv	386	33	447	98
576	liv	345	85	434	146
576	liv	433	51	495	108
576	dead	291	21	323	44
576	dead	324	6	345	23
576	round	442	118	476	148
576	liv	329	142	396	195
576	liv	284	105	319	200
576	liv	287	160	336	214
576	liv	203	129	277	170
576	liv	225	172	283	206
576	liv	259	171	285	226
576	liv	182	205	246	284
576	liv	257	221	344	258
576	liv	258	239	319	299
576	liv	199	239	265	289
576	liv	164	292	243	340
576	liv	230	302	314	341
576	liv	309	274	384	338
576	round	339	208	421	310
576	liv	389	190	472	270
576	liv	403	208	486	281
576	liv	419	270	493	331
576	liv	480	214	533	274
576	liv	501	139	553	213
576	liv	540	152	586	218
576	liv	516	208	567	295
576	liv	493	263	550	321
576	round	570	199	605	231
576	liv	543	229	606	284
576	liv	542	282	585	334
576	liv	594	223	641	288
576	liv	628	215	682	280
576	liv	649	246	683	281
576	liv	635	270	680	317
576	liv	681	242	726	302
576	liv	601	314	715	349
576	round	726	285	762	327
576	dead	573	265	603	287
576	liv	206	339	251	375
576	liv	202	363	237	381
576	liv	205	372	236	390
576	liv	140	342	209	419
576	round	204	385	231	416
576	liv	225	374	270	405
576	liv	251	353	357	388
576	liv	219	378	314	427
576	liv	249	408	328	455
576	liv	380	320	472	367
576	liv	323	358	418	411
576	liv	480	311	598	360
576	liv	414	334	513	386
576	liv	515	348	607	377
576	liv	590	343	683	390
576	liv	505	365	586	417
576	liv	475	363	527	449
576	liv	417	353	498	427
576	liv	361	397	470	434
576	liv	512	396	573	468
576	liv	570	378	653	445
576	liv	680	376	802	415
576	liv	648	387	718	480
576	liv	602	438	670	522
576	liv	159	413	255	506
576	liv	220	427	308	507
576	liv	296	440	403	516
576	round	461	453	512	490
576	round	400	444	435	491
576	liv	426	437	474	495
576	liv	448	487	497	530
576	liv	345	476	409	548
576	liv	382	499	455	563
576	liv	492	477	631	531
576	liv	267	510	345	553
576	liv	221	499	278	564
576	liv	233	535	299	572
576	liv	103	474	218	567
576	liv	76	515	149	607
576	liv	143	559	221	603
576	liv	205	564	277	611
576	liv	95	611	192	703
576	liv	199	597	270	671
576	liv	276	559	370	641
576	liv	359	564	434	646
576	liv	427	568	463	598
576	liv	433	575	478	611
576	liv	436	602	483	649
576	liv	480	521	535	620
576	dead	496	597	523	624
576	liv	545	523	613	560
576	liv	530	531	582	687
576	liv	595	555	692	588
576	liv	573	577	644	638
576	liv	578	627	649	678
576	liv	640	595	754	657
576	liv	669	623	745	726
576	liv	468	619	548	660
576	liv	326	630	422	740
576	liv	272	639	340	724
576	liv	194	668	307	787
576	liv	127	676	223	753
576	liv	289	722	379	802
576	liv	397	670	487	753
576	liv	462	651	552	757
576	liv	443	701	546	779
576	liv	536	686	594	780
576	liv	601	669	670	736
576	liv	577	688	654	779
576	liv	512	757	581	796
576	liv	412	753	444	803
576	liv	340	736	415	805
576	liv	107	734	204	860
576	liv	18	835	108	886
576	liv	139	868	200	971
576	liv	211	835	287	899
576	liv	258	803	313	894
576	liv	304	823	363	889
576	liv	300	793	371	857
576	round	365	810	393	837
576	liv	369	803	432	862
576	liv	415	797	469	878
576	liv	444	776	547	879
576	liv	488	830	566	889
576	liv	543	773	639	844
576	liv	617	768	648	817
576	liv	629	760	672	812
576	round	637	780	663	810
576	liv	1	889	133	999
576	liv	73	971	125	1040
576	liv	219	910	326	974
576	liv	333	867	445	949
576	liv	276	969	360	1037
576	liv	347	950	435	1021
576	dead	399	995	429	1018
576	liv	392	993	473	1040
576	liv	494	882	569	926
576	liv	571	832	634	883
576	liv	542	878	612	949
576	liv	458	909	540	988
576	liv	600	872	662	926
576	liv	647	849	699	905
576	liv	543	952	631	1034
576	liv	636	911	705	966
576	liv	627	965	718	1029
576	liv	621	1014	687	1040
576	liv	711	931	760	989
576	liv	472	997	559	1040
576	liv	719	907	813	997
576	liv	741	721	792	800
576	liv	778	748	838	802
576	liv	659	472	760	565
576	liv	735	515	825	583
576	liv	730	418	826	529
576	liv	879	144	1000	191
576	liv	865	166	918	266
576	dead	864	208	888	236
576	round	851	248	885	281
576	liv	847	284	926	388
576	liv	890	266	969	363
576	liv	929	248	1019	322
576	liv	998	235	1141	299
576	liv	954	311	1038	392
576	liv	830	384	944	468
576	liv	889	387	984	453
576	liv	972	413	1071	471
576	liv	895	423	957	499
576	dead	928	432	962	474
576	liv	879	484	974	627
576	liv	981	555	1014	636
576	liv	981	546	1062	630
576	liv	891	493	933	530
576	liv	1090	351	1161	472
576	liv	1092	476	1202	544
576	liv	1094	558	1183	637
576	liv	1184	548	1282	638
576	liv	1194	641	1287	764
576	liv	1246	807	1290	846
576	liv	1330	112	1386	179
576	round	1289	235	1326	274
576	round	1284	281	1321	322
576	liv	1349	391	1388	499
576	dead	1368	522	1386	541
576	dead	1378	534	1388	558
576	liv	1321	529	1361	570
576	liv	1296	562	1349	668
576	liv	1339	618	1387	736
576	liv	1286	650	1348	737
576	liv	1320	720	1386	801
576	liv	1276	783	1343	848
576	liv	1329	904	1387	1033
576	liv	1377	822	1387	846
