# Supplementary material for: CeCILE - An Artificial Intelligence Based Cell-Detection for the Evaluation of Radiation Effects in Eucaryotic Cells
Source: Front Oncol. 2021 Jun 30;11:688333. doi: 10.3389/fonc.2021.688333 (PMC8278143; doi:10.3389/fonc.2021.688333)
Supplement: Supplementary file 5 [file Table_8.xlsx]

## Sheet: sham
frame	label	start X	start Y	end X	end Y
1	liv	880	0	926	25
1	liv	1178	75	1250	135
1	liv	1151	103	1193	155
1	liv	1128	116	1158	158
1	liv	1162	185	1196	221
1	liv	1155	215	1204	245
1	liv	1167	241	1209	286
1	liv	886	152	942	204
1	liv	852	171	929	229
1	liv	375	135	446	209
1	liv	202	218	265	281
1	round	225	307	267	351
1	round	257	331	293	373
1	round	241	361	275	390
1	round	212	377	251	414
1	round	811	256	861	308
1	round	831	282	864	322
1	round	802	380	838	414
1	round	805	440	835	471
1	round	570	433	616	473
1	round	566	480	597	513
1	round	45	519	83	558
1	round	328	518	365	549
1	round	564	507	609	545
1	round	581	574	615	605
1	round	766	569	811	606
1	round	543	538	585	582
1	liv	411	554	511	599
1	liv	651	551	761	619
1	liv	264	513	321	571
1	liv	248	559	294	602
1	liv	186	523	229	562
1	liv	158	545	215	598
1	liv	101	556	170	604
1	liv	45	574	95	632
1	liv	157	651	217	699
1	liv	267	667	315	719
1	liv	215	661	282	726
1	liv	81	737	141	788
1	liv	109	753	150	800
1	dead	150	722	185	759
1	liv	161	753	208	799
1	liv	250	723	306	764
1	liv	704	878	770	927
1	liv	824	810	895	852
1	liv	874	829	941	879
1	liv	837	846	872	906
1	liv	861	870	910	948
1	liv	1162	673	1216	722
1	liv	1097	673	1152	712
1	liv	1091	687	1154	738
1	liv	1105	720	1154	783
1	liv	928	737	991	792
1	round	1160	718	1195	745
1	round	1157	779	1191	813
1	round	1001	1026	1043	1038
20	liv	370	123	461	203
20	liv	201	215	261	275
20	liv	1191	85	1240	127
20	liv	1149	100	1186	155
20	liv	1118	128	1159	177
20	liv	888	154	934	203
20	round	867	185	923	227
20	round	1161	197	1191	231
20	round	1167	219	1198	248
20	round	1180	234	1217	278
20	round	820	263	857	297
20	round	828	285	860	317
20	round	216	310	250	342
20	round	255	335	294	375
20	round	241	364	273	391
20	round	215	382	249	415
20	round	881	0	923	21
20	round	800	383	835	418
20	round	811	444	838	475
20	round	574	437	605	473
20	round	569	514	597	539
20	round	550	550	583	584
20	round	584	578	612	607
20	round	335	519	363	552
20	round	289	540	327	578
20	round	49	527	91	562
20	round	246	571	288	606
20	round	1166	688	1200	722
20	round	1162	712	1190	746
20	round	1113	740	1145	773
20	round	1158	780	1189	814
20	round	947	757	983	788
20	round	1112	679	1146	717
20	liv	1092	710	1142	745
20	liv	650	559	760	615
20	round	758	571	815	606
20	liv	544	446	593	491
20	liv	545	490	605	517
20	liv	414	559	503	597
20	liv	196	526	233	565
20	liv	170	541	214	593
20	liv	103	560	152	603
20	liv	31	567	90	637
20	liv	275	665	312	713
20	liv	170	663	226	712
20	liv	231	681	280	721
20	liv	258	733	305	764
20	round	145	733	179	762
20	dead	140	724	164	746
20	div	86	762	124	791
20	round	714	886	757	924
20	liv	828	814	910	854
20	liv	887	835	951	956
20	liv	843	853	890	933
20	liv	0	495	19	553
40	round	887	0	921	20
40	round	1195	88	1233	123
40	round	1177	196	1208	223
40	round	1167	204	1197	243
40	round	1179	238	1215	280
40	round	874	187	919	224
40	round	816	266	858	296
40	round	821	290	858	318
40	round	807	382	839	416
40	round	812	447	846	479
40	round	574	438	605	470
40	round	577	512	610	539
40	round	552	550	583	581
40	round	586	578	613	609
40	round	327	520	361	548
40	round	61	534	94	563
40	round	220	383	250	415
40	round	244	365	274	393
40	round	254	336	292	373
40	round	217	312	250	344
40	div	85	758	117	797
40	round	144	726	186	763
40	round	274	675	311	713
40	round	264	729	302	764
40	round	943	751	984	793
40	round	718	891	752	919
40	round	1165	695	1197	727
40	round	1167	717	1194	746
40	round	1119	735	1151	766
40	round	1160	780	1191	812
40	round	1113	679	1148	715
40	liv	0	489	50	535
40	liv	22	573	84	633
40	liv	102	565	152	606
40	liv	194	501	246	549
40	liv	168	533	217	598
40	liv	226	570	278	608
40	liv	292	543	346	588
40	liv	420	554	492	596
40	liv	182	664	224	704
40	liv	233	676	282	721
40	liv	658	544	757	625
40	liv	756	564	814	604
40	liv	835	816	924	866
40	liv	846	851	894	936
40	liv	892	841	964	933
40	liv	542	458	599	506
40	liv	552	494	608	528
40	liv	202	218	265	276
40	liv	378	125	455	203
40	liv	895	152	947	215
40	liv	1145	110	1189	153
40	liv	1126	135	1175	193
40	liv	1088	711	1132	755
60	liv	371	118	464	204
60	liv	196	216	264	272
60	liv	883	0	925	25
60	liv	885	145	953	216
60	liv	1142	101	1198	158
60	liv	1138	149	1188	205
60	liv	1170	201	1210	243
60	liv	527	457	590	509
60	liv	561	506	605	544
60	liv	655	566	757	649
60	liv	422	545	495	601
60	liv	299	537	343	582
60	liv	204	481	251	537
60	liv	168	527	228	592
60	liv	104	556	153	601
60	liv	31	571	94	622
60	liv	182	661	227	710
60	liv	234	674	283	726
60	liv	266	730	304	770
60	liv	1085	711	1128	764
60	liv	754	566	817	603
60	liv	836	817	912	876
60	liv	844	852	888	923
60	liv	885	816	985	944
60	liv	2	487	51	522
60	round	1197	86	1234	125
60	round	1206	183	1241	221
60	round	1182	238	1213	280
60	round	874	190	918	229
60	round	820	265	861	294
60	round	826	288	855	317
60	round	802	378	838	416
60	round	809	458	843	489
60	round	578	441	623	478
60	round	217	309	254	340
60	round	252	338	290	374
60	round	242	363	271	394
60	round	220	379	250	416
60	round	58	527	94	564
60	round	332	516	365	552
60	round	227	570	267	608
60	round	581	491	607	525
60	round	549	546	591	580
60	round	583	574	621	609
60	round	274	679	308	712
60	round	65	761	93	788
60	round	88	762	118	792
60	round	149	733	193	771
60	round	1109	677	1148	714
60	round	1162	695	1196	726
60	round	1159	718	1190	746
60	round	1157	785	1189	813
60	round	963	759	987	792
60	round	937	751	970	788
60	round	719	892	750	923
60	dead	169	746	193	770
60	round	1112	731	1145	765
80	round	886	0	925	21
80	round	1200	84	1236	120
80	round	1180	239	1217	278
80	round	876	191	911	227
80	round	819	266	857	297
80	round	823	291	859	321
80	round	222	306	255	341
80	round	255	341	287	371
80	round	241	365	270	393
80	round	216	380	249	416
80	round	800	448	832	480
80	round	565	435	591	466
80	round	580	444	608	471
80	round	578	490	609	520
80	round	556	546	600	577
80	round	579	577	614	608
80	round	232	574	269	609
80	round	1159	691	1199	723
80	round	1156	717	1187	744
80	round	1161	789	1188	816
80	round	937	751	971	789
80	round	1113	727	1151	768
80	round	716	888	758	926
80	round	80	758	110	790
80	round	147	727	182	765
80	dead	171	738	191	767
80	dead	92	763	112	780
80	liv	1147	89	1196	156
80	liv	1138	142	1201	201
80	liv	1203	179	1263	218
80	liv	1132	202	1211	241
80	liv	379	121	457	192
80	liv	893	151	949	209
80	liv	191	219	258	284
80	liv	803	371	860	416
80	liv	2	487	53	523
80	liv	223	461	306	524
80	liv	519	429	575	530
80	liv	563	501	608	543
80	liv	656	577	752	644
80	liv	332	509	381	556
80	liv	425	553	489	597
80	liv	765	574	816	606
80	liv	296	541	346	590
80	liv	168	524	236	590
80	liv	52	534	101	575
80	liv	28	568	84	617
80	liv	99	560	156	606
80	liv	270	640	303	671
80	liv	277	661	310	711
80	liv	232	679	284	721
80	liv	193	668	234	718
80	liv	262	729	304	771
80	liv	1110	664	1148	714
80	liv	1087	715	1124	758
80	liv	961	748	995	791
80	liv	828	817	906	858
80	liv	847	851	888	915
80	liv	888	824	991	933
100	liv	371	124	463	199
100	liv	194	213	261	288
100	liv	899	155	970	241
100	liv	831	150	899	222
100	liv	881	191	935	248
100	liv	1146	66	1206	146
100	liv	1133	129	1200	196
100	dead	1159	108	1202	139
100	liv	1120	204	1197	250
100	liv	828	250	895	285
100	liv	823	277	854	319
100	liv	798	380	874	420
100	liv	515	390	564	562
100	liv	559	497	611	547
100	liv	657	558	766	639
100	liv	316	548	408	611
100	liv	227	468	305	527
100	liv	168	511	231	577
100	liv	2	490	50	528
100	liv	58	515	108	565
100	liv	100	557	157	602
100	liv	2	562	102	609
100	liv	249	621	296	672
100	liv	203	664	235	718
100	liv	223	670	282	717
100	liv	273	671	314	709
100	liv	1111	675	1156	715
100	liv	1066	718	1119	758
100	liv	964	734	1003	802
100	liv	917	755	962	792
100	liv	812	809	927	848
100	liv	845	849	888	918
100	liv	888	827	963	937
100	div	140	727	180	764
100	dead	141	750	174	776
100	dead	78	764	116	791
100	round	882	0	925	18
100	round	1208	76	1246	121
100	round	1212	178	1259	223
100	round	1173	226	1219	273
100	round	225	296	263	328
100	round	252	336	290	371
100	round	244	367	274	399
100	round	212	383	249	415
100	round	799	440	835	475
100	round	569	433	597	466
100	round	583	447	614	476
100	round	589	487	620	517
100	round	773	569	814	604
100	round	559	548	594	597
100	round	592	575	625	624
100	round	426	547	478	594
100	round	336	516	370	544
100	round	246	573	284	609
100	round	257	733	307	773
100	round	1163	691	1197	729
100	round	1169	727	1200	761
100	round	1110	728	1156	772
100	round	1160	782	1193	812
100	round	726	888	757	924
120	round	885	0	927	23
120	round	1205	76	1255	122
120	round	1207	179	1252	222
120	round	1130	200	1189	239
120	round	1175	228	1217	267
120	round	816	270	848	308
120	round	228	299	259	330
120	round	244	338	286	375
120	round	241	365	275	399
120	round	215	382	251	416
120	round	344	497	381	527
120	round	335	521	371	545
120	round	7	496	56	530
120	round	57	530	95	575
120	round	239	566	277	607
120	round	433	553	478	594
120	round	159	724	190	753
120	round	132	739	161	766
120	round	575	443	607	477
120	round	588	482	618	513
120	round	552	552	594	592
120	round	590	575	636	607
120	round	726	889	757	923
120	round	1158	695	1197	729
120	round	1165	725	1193	756
120	round	1160	781	1194	811
120	round	1117	732	1147	761
120	round	1104	750	1129	781
120	round	1107	679	1152	717
120	dead	1154	92	1182	141
120	liv	1163	67	1208	129
120	liv	1138	125	1196	176
120	liv	899	154	984	256
120	liv	844	177	914	244
120	liv	798	161	846	258
120	liv	845	235	900	281
120	liv	384	125	458	202
120	liv	198	219	260	277
120	liv	798	357	870	413
120	liv	802	446	855	491
120	liv	762	572	818	611
120	liv	515	401	560	566
120	liv	514	400	594	452
120	liv	546	499	621	562
120	liv	676	553	763	636
120	liv	5	566	105	605
120	liv	101	566	151	604
120	liv	168	510	231	579
120	liv	228	476	313	536
120	liv	311	547	402	611
120	liv	259	629	314	672
120	liv	173	668	220	709
120	liv	214	674	288	727
120	liv	269	668	321	720
120	liv	262	725	310	781
120	liv	78	764	116	802
120	liv	1069	713	1125	758
120	liv	967	737	1030	804
120	liv	926	753	971	800
120	liv	831	819	897	883
120	liv	883	809	972	935
120	liv	820	877	880	929
120	dead	81	773	97	797
140	liv	186	213	267	276
140	liv	380	123	464	212
140	liv	766	156	840	256
140	liv	840	128	908	243
140	liv	912	176	1044	272
140	liv	809	217	892	272
140	round	881	0	926	29
140	liv	1204	78	1280	123
140	liv	1164	76	1214	146
140	dead	1160	81	1191	125
140	liv	1143	115	1194	181
140	liv	1130	195	1187	255
140	liv	1159	226	1197	275
140	liv	1185	210	1219	266
140	liv	1208	170	1253	213
140	liv	773	356	909	426
140	liv	552	382	606	468
140	liv	479	371	579	458
140	liv	5	483	54	522
140	liv	39	505	78	557
140	liv	224	454	328	521
140	liv	176	512	236	584
140	liv	0	537	130	604
140	liv	103	560	155	602
140	liv	502	457	554	569
140	liv	560	504	616	561
140	liv	671	549	767	638
140	liv	349	540	419	579
140	liv	371	564	433	609
140	liv	251	627	323	674
140	liv	265	664	316	732
140	liv	216	668	284	725
140	liv	255	729	318	776
140	liv	882	739	959	786
140	liv	831	813	895	868
140	liv	817	877	873	928
140	liv	871	829	987	939
140	liv	967	749	1050	841
140	liv	1062	716	1114	764
140	liv	1071	766	1117	797
140	liv	1106	727	1142	821
140	dead	79	776	107	800
140	round	78	763	113	790
140	round	724	892	758	923
140	round	183	680	213	710
140	round	141	725	183	752
140	round	163	736	191	761
140	round	1110	686	1154	718
140	round	1169	730	1191	755
140	round	1159	697	1196	728
140	round	1160	781	1189	812
140	round	765	569	809	602
140	round	226	574	267	610
140	round	346	500	390	535
140	round	331	531	365	562
140	round	434	538	481	592
140	round	552	551	591	600
140	round	585	566	624	606
140	round	596	468	634	511
140	round	798	436	849	481
140	round	230	296	262	336
140	round	248	330	294	372
140	round	237	370	272	401
140	round	216	380	251	416
140	round	819	275	854	311
160	dead	106	748	130	769
160	dead	1180	723	1204	746
160	dead	1154	77	1171	123
160	dead	1162	784	1190	811
160	round	1164	84	1196	124
160	round	1219	167	1257	220
160	round	816	272	854	315
160	round	873	0	925	19
160	round	221	301	258	330
160	round	261	363	298	394
160	round	212	379	255	418
160	round	182	525	218	564
160	round	219	561	263	599
160	round	345	497	384	534
160	round	329	523	369	563
160	round	606	462	643	501
160	round	586	564	628	606
160	round	546	551	593	606
160	round	764	567	806	603
160	round	1164	693	1201	732
160	round	912	863	940	891
160	round	724	889	760	924
160	round	153	749	182	778
160	round	153	721	178	742
160	round	91	760	118	790
160	round	14	488	46	525
160	round	32	490	69	533
160	liv	141	670	216	744
160	liv	161	627	205	677
160	liv	35	541	133	601
160	liv	104	559	162	605
160	liv	219	452	309	525
160	liv	252	619	335	659
160	liv	270	657	350	732
160	liv	219	659	295	730
160	liv	258	725	323	781
160	liv	1123	678	1158	723
160	liv	1103	682	1130	719
160	liv	1073	710	1124	764
160	liv	1116	725	1160	845
160	liv	1062	765	1107	832
160	liv	953	742	1033	819
160	liv	891	700	965	786
160	liv	854	810	897	854
160	liv	836	825	875	867
160	liv	832	866	875	922
160	liv	873	833	934	948
160	liv	902	817	993	898
160	liv	420	618	479	689
160	liv	357	550	431	608
160	liv	428	531	494	587
160	liv	499	454	559	573
160	liv	551	520	613	566
160	liv	572	492	615	532
160	liv	738	415	844	488
160	liv	666	548	767	632
160	liv	204	210	270	277
160	liv	457	323	588	460
160	liv	540	332	615	469
160	liv	375	127	464	227
160	liv	790	331	917	417
160	liv	749	160	837	256
160	liv	777	206	933	292
160	liv	851	145	927	244
160	liv	925	188	1048	269
160	liv	1172	47	1301	132
160	liv	1139	114	1195	183
160	liv	1139	181	1193	251
160	liv	1172	201	1212	253
160	liv	1163	222	1218	277
180	liv	871	0	933	32
180	liv	1236	76	1302	119
180	liv	1195	68	1242	129
180	liv	1136	75	1207	120
180	liv	1185	95	1236	156
180	dead	1153	76	1195	108
180	liv	1132	115	1195	183
180	liv	1122	173	1191	241
180	liv	1162	202	1218	265
180	liv	1107	233	1178	298
180	liv	885	136	969	235
180	liv	928	205	1044	280
180	liv	757	167	826	250
180	liv	767	216	919	291
180	liv	786	286	920	417
180	liv	379	122	468	215
180	liv	181	219	264	280
180	liv	169	385	260	448
180	liv	264	379	307	459
180	liv	220	462	317	527
180	liv	186	514	247	568
180	liv	156	525	204	580
180	liv	7	531	152	594
180	liv	96	561	157	603
180	liv	212	553	270	611
180	liv	178	613	240	650
180	liv	248	614	332	669
180	liv	167	648	220	724
180	liv	727	428	839	498
180	liv	525	301	618	468
180	liv	410	286	588	455
180	liv	512	428	549	498
180	liv	508	499	544	594
180	liv	611	465	664	519
180	liv	564	475	604	519
180	liv	564	512	618	565
180	liv	526	530	581	583
180	liv	568	556	618	603
180	liv	543	571	583	610
180	liv	687	542	754	609
180	liv	673	591	729	636
180	liv	330	525	372	571
180	liv	376	561	444	616
180	liv	346	623	434	692
180	liv	204	639	297	742
180	liv	262	656	346	737
180	liv	239	730	329	807
180	liv	918	722	980	825
180	liv	970	741	1041	825
180	liv	860	791	914	836
180	liv	836	822	890	867
180	liv	914	815	997	891
180	liv	865	862	932	918
180	liv	1066	770	1126	865
180	liv	1076	717	1134	765
180	liv	1106	677	1153	716
180	liv	1145	647	1196	701
180	liv	1133	744	1196	854
180	liv	1224	175	1268	227
180	liv	206	376	256	415
180	dead	1144	776	1167	804
180	dead	1174	677	1195	701
180	dead	167	729	188	758
180	round	1160	695	1198	732
180	round	858	883	880	915
180	round	830	885	865	918
180	round	724	891	755	921
180	round	768	569	800	601
180	round	437	546	474	582
180	round	84	763	113	790
180	round	152	750	180	779
180	round	148	709	176	740
180	round	5	480	59	527
180	round	345	496	382	535
180	round	241	349	278	386
180	round	220	309	251	339
180	round	204	332	242	362
180	round	816	261	851	306
200	liv	872	0	931	42
200	liv	1192	33	1257	124
200	liv	1246	52	1309	112
200	liv	1192	103	1240	157
200	liv	1125	104	1193	190
200	liv	1191	151	1258	220
200	dead	1152	70	1199	118
200	liv	1164	216	1223	304
200	liv	1092	250	1173	345
200	liv	945	188	1066	265
200	liv	950	240	998	343
200	liv	855	144	962	237
200	liv	745	151	853	251
200	liv	767	218	916	289
200	liv	794	300	925	415
200	liv	749	422	835	493
200	liv	180	212	266	292
200	liv	519	265	605	471
200	liv	408	294	592	454
200	liv	497	391	549	503
200	liv	544	450	612	511
200	liv	553	500	628	552
200	liv	500	470	540	600
200	liv	229	346	277	391
200	liv	202	375	248	440
200	liv	113	370	249	454
200	liv	232	380	292	449
200	liv	259	443	333	482
200	liv	229	462	324	522
200	liv	1	497	128	595
200	liv	103	565	147	602
200	liv	129	512	190	573
200	liv	178	515	247	577
200	liv	319	514	375	574
200	liv	164	613	307	650
200	liv	387	504	458	569
200	liv	450	531	516	631
200	liv	372	555	486	622
200	liv	348	613	428	686
200	liv	511	538	566	649
200	liv	550	579	590	682
200	liv	296	646	346	734
200	liv	210	639	303	730
200	liv	179	636	224	719
200	liv	161	649	199	723
200	liv	205	726	326	812
200	liv	676	530	781	610
200	liv	673	591	749	677
200	liv	860	710	953	778
200	liv	950	740	1061	826
200	liv	835	754	909	825
200	liv	915	808	1019	898
200	liv	847	814	907	867
200	liv	830	842	866	910
200	liv	798	848	864	900
200	liv	873	859	938	940
200	liv	1065	765	1146	860
200	liv	1132	744	1171	879
200	liv	1156	627	1216	688
200	dead	1138	778	1160	801
200	round	150	736	182	769
200	dead	158	718	185	743
200	div	14	468	60	522
200	round	86	763	115	792
200	round	726	892	756	923
200	round	1163	693	1198	730
200	round	1110	676	1155	720
200	round	1093	718	1140	761
200	round	576	564	626	614
200	round	765	568	798	603
200	round	611	468	653	510
200	round	337	488	379	531
200	round	209	558	257	610
200	round	213	305	255	342
200	round	174	332	219	367
200	round	403	145	447	190
200	round	1139	189	1179	231
200	round	813	263	860	306
288	liv	483	93	565	170
288	liv	378	89	464	181
288	round	200	212	232	239
288	liv	194	219	257	292
288	liv	170	280	262	341
288	liv	145	304	182	356
288	liv	281	306	364	379
288	liv	205	331	290	422
288	liv	540	310	596	415
288	round	147	386	198	434
288	liv	279	386	353	449
288	liv	791	123	834	189
288	liv	715	204	807	246
288	liv	936	127	1011	188
288	liv	872	162	935	238
288	liv	914	199	1037	257
288	dead	880	225	949	274
288	round	829	228	868	265
288	round	799	236	838	280
288	liv	817	268	862	310
288	liv	851	251	900	295
288	liv	1098	231	1158	298
288	liv	940	270	1134	389
288	liv	1025	356	1179	420
288	liv	1168	250	1230	318
288	liv	1131	139	1188	219
288	liv	1153	194	1227	264
288	liv	1130	79	1200	155
288	liv	1191	75	1260	158
288	liv	1203	146	1279	214
288	liv	1255	100	1316	160
288	liv	1284	133	1367	198
288	dead	1210	96	1247	135
288	round	1270	64	1311	100
288	liv	784	334	891	413
288	liv	863	365	942	433
288	liv	605	404	706	467
288	liv	723	428	836	514
288	liv	796	470	887	557
288	liv	577	403	613	471
288	liv	541	411	588	475
288	liv	525	427	578	488
288	liv	481	403	544	480
288	liv	466	408	535	579
288	round	500	469	539	506
288	liv	527	467	652	551
288	liv	568	488	634	542
288	liv	38	388	128	468
288	liv	13	442	84	510
288	liv	51	472	125	561
288	liv	31	550	106	664
288	liv	125	433	233	520
288	liv	207	441	332	522
288	liv	168	496	251	569
288	liv	114	520	178	593
288	liv	241	512	320	568
288	liv	291	542	356	591
288	liv	323	509	396	558
288	liv	379	504	430	568
288	round	105	572	141	605
288	liv	63	605	135	665
288	liv	25	684	124	783
288	liv	121	585	227	685
288	liv	142	594	325	677
288	liv	228	612	307	677
288	liv	278	635	334	697
288	liv	281	581	367	635
288	liv	361	562	428	643
288	liv	419	498	486	571
288	dead	442	524	484	569
288	liv	423	562	474	618
288	liv	465	551	517	625
288	liv	509	542	609	628
288	liv	606	576	704	676
288	liv	539	615	661	670
288	liv	643	510	780	605
288	liv	670	606	810	680
288	liv	326	632	382	700
288	liv	329	698	412	758
288	round	214	671	243	700
288	liv	181	666	220	700
288	liv	210	693	254	719
288	div	122	720	160	754
288	round	87	760	122	786
288	liv	218	684	328	800
288	round	770	565	802	598
288	round	785	724	824	760
288	round	1214	716	1258	764
288	liv	652	824	723	902
288	liv	720	816	823	882
288	liv	817	712	923	805
288	liv	825	801	908	870
288	liv	904	793	999	879
288	liv	840	878	969	973
288	liv	933	745	1008	820
288	liv	989	744	1075	825
288	liv	1036	680	1103	748
288	liv	1072	654	1168	715
288	liv	1088	712	1163	782
288	liv	1062	780	1135	848
288	liv	1106	767	1184	882
288	round	1133	745	1200	870
288	round	722	886	758	921
288	liv	1169	797	1205	837
288	round	1199	647	1231	676
288	liv	1164	657	1228	694
432	liv	95	134	306	266
432	liv	72	209	137	278
432	dead	175	185	199	211
432	liv	426	181	550	261
432	liv	298	242	407	317
432	liv	42	277	133	343
432	liv	139	282	214	338
432	liv	204	274	279	332
432	liv	191	319	259	351
432	liv	220	344	269	375
432	liv	119	316	175	360
432	liv	154	338	216	391
432	liv	72	335	155	380
432	liv	1	377	47	412
432	liv	3	340	181	442
432	liv	143	390	209	424
432	liv	180	369	245	417
432	liv	339	332	417	397
432	liv	214	394	276	456
432	div	294	356	342	389
432	dead	313	397	336	422
432	round	271	404	310	437
432	round	271	433	303	461
432	liv	300	418	341	480
432	liv	327	395	397	464
432	liv	382	347	505	401
432	liv	350	397	463	477
432	liv	396	412	467	470
432	liv	422	442	470	500
432	liv	148	422	228	526
432	liv	84	431	173	508
432	liv	42	438	103	496
432	liv	2	451	51	518
432	liv	36	490	101	546
432	liv	172	465	298	525
432	liv	274	484	346	560
432	dead	58	540	108	576
432	liv	77	543	166	610
432	liv	113	573	169	606
432	liv	152	559	206	616
432	liv	106	597	171	641
432	round	0	526	13	561
432	div	0	612	50	661
432	liv	4	660	56	722
432	liv	27	660	63	780
432	liv	65	643	102	675
432	liv	85	658	117	711
432	round	69	744	103	773
432	liv	82	621	185	682
432	liv	160	607	216	660
432	liv	131	664	195	753
432	liv	185	658	243	753
432	liv	233	536	299	587
432	liv	211	599	260	648
432	liv	205	626	258	683
432	liv	231	667	267	722
432	liv	278	563	348	622
432	liv	301	579	354	637
432	liv	250	604	325	664
432	liv	257	640	337	710
432	liv	229	696	329	805
432	liv	105	753	240	855
432	liv	335	473	378	537
432	liv	368	466	432	539
432	liv	389	495	452	550
432	liv	444	497	488	550
432	liv	453	442	490	493
432	liv	462	342	514	432
432	liv	476	405	502	453
432	liv	504	407	564	467
432	liv	484	430	547	493
432	liv	475	482	549	524
432	liv	486	519	537	559
432	liv	526	514	571	560
432	liv	335	534	390	612
432	liv	369	533	411	597
432	liv	400	563	446	611
432	liv	408	540	481	567
432	liv	421	560	512	587
432	liv	496	550	549	598
432	round	380	613	420	651
432	liv	394	637	464	687
432	liv	430	605	481	672
432	liv	471	594	534	674
432	liv	342	641	453	724
432	liv	320	696	392	773
432	liv	346	729	385	794
432	liv	374	718	458	781
432	liv	484	664	584	721
432	round	546	55	589	95
432	liv	615	100	692	172
432	liv	843	0	906	32
432	liv	1000	0	1050	27
432	liv	1075	0	1116	59
432	liv	754	66	840	153
432	liv	755	127	813	163
432	liv	746	161	803	213
432	liv	672	159	766	225
432	liv	618	203	780	306
432	liv	525	269	573	412
432	liv	555	283	592	383
432	liv	1027	7	1107	93
432	liv	1107	1	1190	49
432	liv	1204	2	1286	50
432	liv	1151	9	1218	69
432	liv	1233	19	1297	91
432	liv	1215	55	1289	116
432	liv	1150	54	1210	104
432	liv	1128	72	1192	136
432	liv	1177	71	1238	132
432	liv	1089	98	1164	160
432	liv	1025	88	1109	169
432	liv	922	41	998	135
432	liv	963	93	1029	171
432	liv	864	105	976	185
432	liv	817	117	950	214
432	liv	825	187	876	230
432	liv	790	205	848	251
432	liv	778	245	844	282
432	liv	782	271	852	326
432	liv	830	230	920	331
432	liv	947	190	1025	289
432	liv	953	167	1051	233
432	liv	1062	156	1148	225
432	liv	1052	200	1133	258
432	liv	1050	240	1165	312
432	liv	1012	294	1147	372
432	liv	1140	259	1228	317
432	liv	1149	207	1235	266
432	liv	1131	180	1168	225
432	liv	1174	126	1220	198
432	liv	1228	142	1283	223
432	liv	1257	153	1318	208
432	liv	1282	126	1366	189
432	liv	1299	179	1381	250
432	liv	1318	58	1388	101
432	liv	1051	355	1160	436
432	liv	1036	426	1127	475
432	liv	689	259	782	356
432	liv	597	324	660	374
432	liv	577	357	643	435
432	liv	547	371	593	457
432	liv	574	435	618	491
432	liv	548	471	586	531
432	liv	576	485	623	531
432	liv	605	343	683	454
432	liv	639	391	687	483
432	liv	672	337	761	397
432	liv	670	373	756	453
432	liv	747	322	813	433
432	liv	795	307	998	410
432	liv	730	414	858	498
432	liv	900	375	1001	487
432	liv	631	481	748	579
432	liv	730	499	856	556
432	liv	513	545	613	624
432	liv	572	535	641	621
432	round	611	597	652	633
432	liv	553	616	588	696
432	liv	563	679	601	749
432	liv	596	676	639	750
432	liv	672	569	744	644
432	liv	740	551	818	627
432	liv	773	549	920	644
432	liv	641	641	688	713
432	liv	661	642	709	707
432	liv	688	631	829	734
432	liv	682	738	766	771
432	liv	761	728	815	772
432	liv	825	642	893	728
432	liv	836	686	926	784
432	dead	896	817	940	866
432	liv	673	769	740	835
432	liv	521	830	638	922
432	liv	633	862	712	944
432	round	703	864	730	901
432	liv	718	819	812	897
432	liv	847	795	924	859
432	liv	913	723	966	787
432	liv	923	778	999	841
432	liv	1082	538	1132	587
432	liv	944	622	1004	700
432	liv	1083	577	1135	638
432	liv	1150	585	1216	626
432	liv	1212	612	1273	677
432	liv	1071	653	1141	720
432	liv	1133	664	1176	716
432	liv	1158	687	1195	732
432	liv	1232	702	1360	783
432	liv	1158	709	1242	788
432	liv	958	699	1074	818
432	liv	1066	711	1170	796
432	liv	1025	744	1090	829
432	liv	1073	777	1222	834
432	liv	961	813	1033	893
432	liv	1022	811	1138	858
432	liv	1213	785	1327	891
432	liv	1178	811	1256	891
432	liv	1101	825	1220	893
432	liv	1035	849	1145	907
432	liv	994	848	1078	949
432	liv	893	877	1022	920
432	liv	824	874	943	958
432	liv	946	945	1061	1040
432	liv	341	0	468	71
576	liv	198	0	303	42
576	liv	304	0	379	57
576	liv	439	0	483	61
576	liv	427	52	547	118
576	liv	128	43	298	110
576	liv	326	67	418	147
576	dead	67	129	124	206
576	round	62	199	88	227
576	dead	185	169	207	191
576	liv	130	119	245	244
576	liv	187	110	344	193
576	liv	25	139	93	208
576	liv	1	162	47	220
576	liv	18	203	71	264
576	round	60	216	99	253
576	liv	3	253	69	352
576	round	105	269	135	301
576	round	89	315	124	346
576	liv	127	211	186	328
576	liv	175	238	235	336
576	liv	230	196	309	285
576	liv	210	265	271	332
576	liv	258	250	318	314
576	liv	222	292	282	352
576	liv	325	149	391	247
576	liv	395	117	470	192
576	liv	458	120	554	195
576	liv	374	194	423	248
576	liv	418	183	465	286
576	liv	334	239	381	300
576	liv	331	266	370	324
576	liv	369	254	416	314
576	liv	359	282	419	382
576	liv	267	258	331	354
576	liv	299	299	349	339
576	liv	278	325	330	375
576	liv	321	331	363	393
576	liv	294	360	336	412
576	liv	253	354	302	425
576	liv	270	398	314	448
576	liv	284	405	343	454
576	liv	345	389	391	465
576	liv	520	184	548	266
576	liv	451	211	524	281
576	liv	466	273	536	330
576	liv	417	292	461	376
576	liv	463	292	509	358
576	liv	447	335	504	413
576	liv	423	372	495	446
576	liv	492	323	552	386
576	liv	514	277	574	368
576	liv	524	259	593	344
576	liv	379	382	436	449
576	liv	2	355	76	434
576	liv	67	356	150	413
576	liv	138	340	224	399
576	liv	219	348	266	401
576	liv	189	394	257	477
576	liv	88	400	154	478
576	round	200	371	226	400
576	round	189	397	216	422
576	liv	165	399	200	434
576	liv	116	425	198	495
576	round	52	439	89	474
576	liv	0	430	56	480
576	liv	32	479	102	539
576	liv	1	522	41	659
576	liv	30	526	138	577
576	liv	83	496	141	547
576	liv	128	486	174	557
576	liv	161	486	222	547
576	liv	208	464	278	522
576	liv	263	443	325	483
576	liv	314	424	362	472
576	liv	386	443	430	510
576	liv	331	454	390	514
576	liv	287	470	357	515
576	liv	264	475	306	525
576	liv	398	498	474	553
576	liv	385	520	446	585
576	liv	346	508	399	574
576	liv	310	503	348	558
576	liv	287	509	321	573
576	liv	253	513	299	583
576	liv	218	513	266	600
576	liv	191	520	226	590
576	liv	216	567	250	614
576	liv	197	571	244	641
576	liv	168	560	206	626
576	liv	149	610	202	656
576	liv	104	565	178	640
576	liv	40	564	106	633
576	dead	130	565	151	592
576	dead	147	568	176	598
576	dead	213	609	245	641
576	dead	213	665	242	684
576	liv	97	632	144	679
576	liv	54	634	114	695
576	liv	0	653	40	722
576	liv	42	673	85	728
576	liv	52	692	127	727
576	liv	130	684	196	743
576	liv	26	724	91	770
576	liv	21	757	81	802
576	liv	123	763	180	810
576	liv	164	741	226	798
576	liv	244	585	300	654
576	liv	295	558	342	622
576	liv	327	568	390	627
576	liv	375	565	442	634
576	liv	337	604	385	676
576	liv	295	621	342	668
576	liv	229	662	314	703
576	liv	198	673	240	725
576	liv	241	701	308	733
576	liv	230	724	312	780
576	liv	290	707	339	769
576	liv	306	667	356	717
576	liv	339	661	411	727
576	liv	385	605	454	657
576	liv	15	797	57	864
576	liv	50	837	158	898
576	liv	199	820	273	921
576	liv	227	774	284	817
576	liv	263	766	331	807
576	liv	252	808	319	882
576	liv	345	724	405	808
576	liv	331	771	424	835
576	liv	316	797	374	837
576	liv	370	759	421	884
576	dead	340	762	368	787
576	round	0	850	9	880
576	liv	529	101	578	192
576	liv	545	167	564	236
576	liv	572	48	612	141
576	liv	563	120	593	185
576	liv	579	139	625	191
576	liv	570	166	625	223
576	liv	545	205	619	281
576	liv	612	26	679	114
576	liv	606	82	646	161
576	liv	637	99	676	157
576	liv	618	160	706	253
576	liv	590	243	648	358
576	liv	629	255	689	349
576	liv	673	0	767	65
576	liv	684	30	764	127
576	liv	665	109	716	185
576	liv	715	94	785	158
576	liv	704	142	764	194
576	liv	767	1	816	56
576	dead	826	21	853	47
576	dead	802	13	828	37
576	liv	790	2	861	60
576	liv	854	0	924	45
576	liv	896	1	951	23
576	liv	797	45	847	111
576	liv	777	87	822	184
576	liv	748	162	805	209
576	liv	774	156	855	220
576	liv	705	188	816	271
576	liv	950	2	1011	57
576	liv	907	16	986	83
576	liv	827	37	913	195
576	liv	899	75	966	150
576	liv	933	60	1027	140
576	liv	998	0	1038	49
576	liv	1027	0	1093	73
576	liv	1071	7	1110	69
576	liv	1019	0	1083	41
576	round	1032	24	1081	60
576	liv	1009	50	1085	119
576	dead	1141	22	1176	55
576	liv	1096	23	1169	85
576	liv	1161	1	1203	64
576	liv	1189	0	1232	71
576	liv	1211	1	1271	44
576	liv	1204	12	1282	105
576	liv	1279	4	1346	78
576	liv	1323	4	1388	45
576	liv	1290	35	1381	109
576	liv	1302	68	1365	136
576	liv	1216	77	1279	124
576	liv	1203	98	1252	170
576	liv	1245	80	1318	164
576	liv	1271	131	1372	190
576	liv	1200	142	1300	204
576	liv	1139	63	1207	116
576	liv	1098	67	1149	122
576	liv	1073	80	1125	128
576	liv	1137	104	1220	145
576	round	1076	112	1112	151
576	liv	1152	135	1213	195
576	liv	1105	121	1158	218
576	liv	1021	119	1084	188
576	liv	1057	151	1123	226
576	liv	968	131	1030	209
576	liv	901	140	971	212
576	liv	837	177	895	220
576	liv	879	192	956	236
576	liv	867	215	927	248
576	liv	788	209	886	259
576	liv	896	235	991	284
576	liv	808	238	880	291
576	liv	760	251	826	287
576	liv	690	259	805	311
576	liv	949	201	1057	244
576	liv	837	276	895	337
576	dead	853	281	878	305
576	liv	806	289	859	381
576	liv	693	297	802	349
576	liv	651	300	720	370
576	liv	697	330	782	393
576	liv	791	335	830	409
576	liv	813	371	850	427
576	liv	733	379	812	457
576	liv	673	382	754	469
576	liv	618	369	726	412
576	liv	577	335	653	404
576	liv	570	354	608	426
576	liv	531	374	595	434
576	liv	496	374	539	415
576	liv	478	411	527	466
576	liv	452	420	495	485
576	liv	433	419	459	486
576	liv	432	478	495	539
576	liv	544	387	591	434
576	liv	605	413	674	443
576	liv	535	421	568	461
576	liv	507	435	554	481
576	liv	484	465	546	525
576	liv	549	457	603	511
576	round	588	441	618	463
576	round	565	438	594	465
576	liv	610	454	694	519
576	liv	496	499	550	569
576	liv	552	499	627	549
576	liv	540	524	582	555
576	liv	520	541	552	576
576	liv	543	551	618	580
576	liv	612	523	661	591
576	liv	648	533	714	604
576	liv	658	514	787	581
576	liv	699	489	818	572
576	liv	721	571	801	642
576	liv	657	571	719	640
576	liv	719	610	809	677
576	liv	665	628	771	721
576	dead	610	631	640	662
576	liv	436	549	478	624
576	liv	466	555	540	593
576	liv	470	586	526	639
576	liv	514	574	561	636
576	liv	547	568	594	622
576	liv	590	569	639	618
576	liv	457	625	514	681
576	liv	515	624	581	654
576	liv	492	643	576	698
576	liv	580	647	658	691
576	liv	506	670	631	713
576	liv	416	656	491	728
576	liv	478	692	523	717
576	liv	472	709	545	746
576	liv	532	710	582	757
576	liv	572	708	624	761
576	liv	622	700	736	739
576	liv	402	716	477	783
576	liv	415	772	467	845
576	liv	459	734	497	829
576	liv	486	726	541	804
576	liv	449	787	521	873
576	liv	504	769	565	830
576	liv	558	752	625	809
576	liv	627	742	709	776
576	liv	633	774	705	815
576	liv	532	811	598	895
576	liv	513	827	559	888
576	liv	512	884	561	945
576	liv	456	877	523	947
576	liv	599	820	675	904
576	liv	596	916	658	1009
576	liv	667	871	748	929
576	liv	687	892	788	981
576	liv	668	980	758	1038
576	liv	764	705	810	762
576	liv	719	730	767	777
576	liv	672	799	769	868
576	liv	752	758	806	816
576	liv	760	797	832	842
576	round	566	795	601	824
576	dead	1263	240	1282	254
576	dead	1263	219	1287	241
576	liv	1140	191	1181	227
576	liv	1167	194	1211	252
576	liv	1215	192	1272	296
576	liv	1283	224	1359	299
576	liv	1286	230	1387	318
576	liv	1097	212	1149	267
576	liv	1141	230	1190	302
576	liv	1039	225	1097	319
576	liv	1087	269	1157	366
576	liv	1166	267	1250	364
576	liv	943	306	1024	429
576	liv	1017	297	1077	437
576	liv	1068	347	1173	436
576	liv	1134	331	1263	456
576	liv	849	346	914	443
576	liv	809	408	907	506
576	liv	894	393	972	522
576	round	1170	441	1195	474
576	round	1146	452	1174	479
576	liv	1112	406	1220	490
576	liv	1171	481	1232	583
576	liv	1001	405	1080	490
576	liv	1001	436	1082	545
576	round	979	497	1015	541
576	liv	816	501	903	562
576	liv	862	525	946	605
576	liv	876	563	969	648
576	liv	790	569	864	659
576	liv	854	615	928	724
576	liv	783	633	874	728
576	liv	785	698	882	781
576	liv	805	723	880	806
576	liv	915	631	981	724
576	liv	899	710	982	760
576	round	886	727	913	756
576	round	878	751	901	780
576	liv	958	516	1053	630
576	liv	1014	560	1087	612
576	liv	1068	492	1177	584
576	liv	1150	548	1207	627
576	liv	1082	576	1162	640
576	liv	1058	613	1136	648
576	liv	1043	638	1159	664
576	liv	967	633	1037	737
576	div	1056	657	1120	687
576	liv	1212	601	1275	676
576	liv	1265	622	1345	685
576	liv	1274	670	1357	756
576	liv	1111	668	1174	737
576	liv	1152	703	1187	764
576	liv	1006	677	1092	772
576	liv	1321	754	1387	826
576	liv	1180	746	1306	843
576	liv	833	791	909	844
576	liv	900	750	1049	893
576	liv	908	808	951	861
576	liv	896	844	940	883
576	liv	1056	752	1145	808
576	liv	1065	791	1156	838
576	liv	1151	800	1191	849
576	liv	1042	803	1115	852
576	liv	1087	833	1175	872
576	liv	1040	834	1097	870
576	liv	1062	856	1119	928
576	liv	1012	845	1077	896
576	liv	1057	876	1123	958
576	liv	1112	867	1180	924
576	liv	1172	843	1285	882
576	liv	1178	845	1264	982
576	liv	1240	884	1292	949
576	liv	1287	851	1368	963
576	liv	1000	881	1064	952
576	liv	972	885	1035	940
576	liv	948	881	997	938
576	liv	892	875	956	916
576	liv	820	874	893	936
576	liv	890	902	960	945
576	liv	926	932	1031	987
576	liv	923	990	948	1040
576	dead	1339	927	1388	968
